# Supplementary material for: Synthesis of quinazoin-4-ones through an acid ion exchange resin mediated cascade reaction
Source: Royal Society of Chemistry journal article supplement (doi:10.1039/d0ob00881h), 2020-01-01

## Synthesis of quinazoin-4-ones through acid ion exchange resin mediated cascade reaction

Huiyong Yang,<sup>‡</sup> Jun Xu,<sup>‡</sup> Yilan Zhang, Lei He, Pengfei Zhang, and Wanmei Li\*

College of Material, Chemistry and Chemical Engineering, Hangzhou Normal University, Hangzhou 310036, China.

E-mail: [liwanmei@hznu.edu.cn](mailto:liwanmei@hznu.edu.cn)

<sup>‡</sup> These authors contributed equally to this work.

## Supporting Information

### Table of contents

|                                                                              |    |
|------------------------------------------------------------------------------|----|
| 1. Procedures to synthesize starting materials <b>1</b>                      | 2  |
| 2. Characterization of starting materials <b>1</b>                           | 2  |
| 3. Optimization of reaction conditions                                       | 10 |
| 4. X-ray Crystal Data for <b>2a</b>                                          | 12 |
| 5. Copies of <sup>1</sup> H, <sup>13</sup> C and <sup>19</sup> F NMR Spectra | 13 |

## 1. Procedures to synthesize starting materials 1

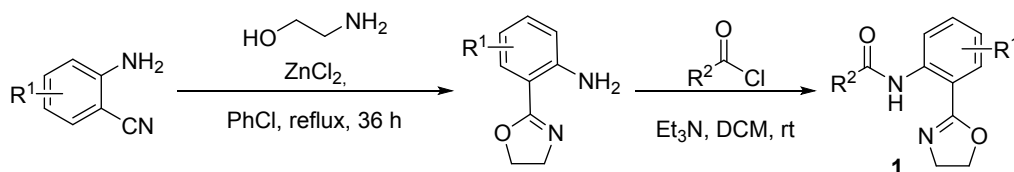

2-aminobenzonitrile (19.00 g, 250 mmol) and  $\text{ZnCl}_2$  (3.34 g, 25 mmol) was added to a 500 mL three-necked flask, and then suspended in chlorobenzene (350 mL) under nitrogen. 2-aminoethanol (45 mL, 750 mmol) was added to the suspension via a syringe. The mixture was slowly heated to reflux until no gas was produced. After refluxing for 36 hours, the reaction mixture was cooled down to room temperature and the solvent was removed in a rotary evaporator.  $\text{CH}_2\text{Cl}_2$  (250 mL) was added to the residue and washed with saturated  $\text{NaHCO}_3$  (150 mL) and  $\text{H}_2\text{O}$  (150 mL). The aqueous fraction was extracted with  $\text{CH}_2\text{Cl}_2$  (250 mL  $\times$  3). The combined organic phase was dried over  $\text{Na}_2\text{SO}_4$ , filtered and the solvent was removed in a rotary evaporator. The crude product was recrystallized from EA/PE to give the substituted 2-(4,5-dihydrooxazol-2-yl)anilines.

Substituted 2-(4,5-dihydrooxazol-2-yl)anilines (5 mmol) and acid chloride (5.5 mmol) were added to a 100 mL flask and then dissolved with DCM (20 mL).  $\text{Et}_3\text{N}$  (7.5 mmol) was taken to the vigorously stirred solution via a syringe. The reaction was stirred at room temperature for 10 h and quenched with saturated  $\text{NaHCO}_3$ . And then the mixture was extracted with EtOAc. Combined organic phase was washed with brine, dried over anhydrous  $\text{Na}_2\text{SO}_4$ , and concentrated under reduced pressure. The crude product was further recrystallized from EA/PE to give the starting materials 1.

## 2. Characterization of starting materials 1

### *N*-(2-(4,5-dihydrooxazol-2-yl)phenyl)benzamide (1a)

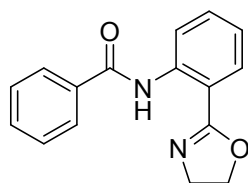

$^1\text{H}$  NMR (500 MHz,  $\text{CDCl}_3$ )  $\delta$  13.02 (s, 1H), 8.97 (d,  $J = 8.5$  Hz, 1H), 8.11 – 8.06 (m, 2H), 7.89 (dd,  $J = 7.9, 1.5$  Hz, 1H), 7.57 – 7.46 (m, 4H), 7.10 (td,  $J = 7.9, 1.1$  Hz, 1H), 4.40 (t,  $J = 9.3$  Hz, 2H), 4.18 (t,  $J = 9.6$  Hz, 2H).

### *N*-(2-(4,5-dihydrooxazol-2-yl)phenyl)-2-methylbenzamide (1b)

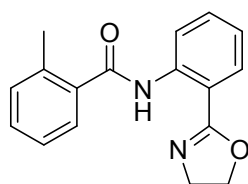

$^1\text{H}$  NMR (500 MHz,  $\text{CDCl}_3$ )  $\delta$  12.58 (s, 1H), 8.95 (d,  $J = 8.5$  Hz, 1H), 7.89 (d,  $J = 7.9$  Hz, 1H), 7.63 (d,  $J = 7.8$  Hz, 1H), 7.52 (t,  $J = 7.9$  Hz, 1H), 7.36 (t,  $J = 7.5$  Hz, 1H), 7.29 – 7.26 (m, 2H), 7.12 (t,  $J = 7.6$  Hz, 1H), 4.36 (t,  $J = 9.5$  Hz, 2H), 4.05 (t,  $J = 9.5$  Hz, 2H), 2.57 (s, 3H).

**2-Chloro-*N*-(2-(4,5-dihydrooxazol-2-yl)phenyl)benzamide (1c)**

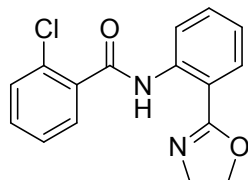

$^1\text{H}$  NMR (500 MHz,  $\text{CDCl}_3$ )  $\delta$  12.70 (s, 1H), 8.93 (d,  $J = 8.4$  Hz, 1H), 7.89 (dd,  $J = 7.9$ , 1.4 Hz, 1H), 7.65 (dd,  $J = 7.4$ , 1.8 Hz, 1H), 7.55 – 7.50 (m, 1H), 7.46 (dd,  $J = 7.8$ , 1.0 Hz, 1H), 7.41 – 7.33 (m, 2H), 7.14 (t,  $J = 7.6$  Hz, 1H), 4.35 (dd,  $J = 12.8$ , 6.4 Hz, 2H), 4.03 (t,  $J = 9.5$  Hz, 2H).

***N*-(2-(4,5-dihydrooxazol-2-yl)phenyl)-2-fluorobenzamide (1d)**

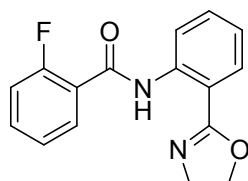

$^1\text{H}$  NMR (500 MHz,  $\text{CDCl}_3$ )  $\delta$  12.81 (s, 1H), 8.91 (d,  $J = 8.4$  Hz, 1H), 7.93 (td,  $J = 7.6$ , 1.6 Hz, 1H), 7.86 (dd,  $J = 7.9$ , 1.3 Hz, 1H), 7.52 – 7.43 (m, 2H), 7.24 (t,  $J = 7.5$  Hz, 1H), 4.33 (t,  $J = 9.5$  Hz, 2H), 4.07 (t,  $J = 9.5$  Hz, 2H).

***N*-(2-(4,5-dihydrooxazol-2-yl)phenyl)-3-methylbenzamide (1e)**

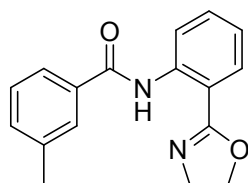

$^1\text{H}$  NMR (500 MHz,  $\text{CDCl}_3$ )  $\delta$  12.98 (s, 1H), 8.96 (d,  $J = 8.5$  Hz, 1H), 7.93 (s, 1H), 7.91 – 7.84 (m, 2H), 7.55 – 7.47 (m, 1H), 7.41 – 7.32 (m, 2H), 7.14 – 7.07 (m, 1H), 4.41 (t,  $J = 9.5$  Hz, 2H), 4.20 (t,  $J = 9.4$  Hz, 2H), 2.44 (s, 3H).

***N*-(2-(4,5-dihydrooxazol-2-yl)phenyl)-3-(trifluoromethyl)benzamide (1f)**

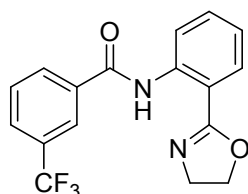

$^1\text{H}$  NMR (500 MHz,  $\text{CDCl}_3$ )  $\delta$  13.30 (s, 1H), 8.45 (s, 1H), 8.31 (d,  $J = 7.8$  Hz, 1H), 7.92 (dd,  $J = 7.9, 1.5$  Hz, 1H), 7.80 (d,  $J = 7.7$  Hz, 1H), 7.65 (t,  $J = 7.8$  Hz, 1H), 7.57 – 7.52 (m, 1H), 7.15 (t,  $J = 7.6$  Hz, 1H), 4.45 (t,  $J = 9.4$  Hz, 2H), 4.23 (t,  $J = 9.6$  Hz, 2H).

***N*-(2-(4,5-dihydrooxazol-2-yl)phenyl)-4-methylbenzamide (1g)**

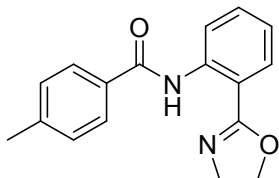

$^1\text{H}$  NMR (500 MHz,  $\text{CDCl}_3$ )  $\delta$  12.96 (s, 1H), 8.96 (d,  $J = 8.5$  Hz, 1H), 7.99 (d,  $J = 8.2$  Hz, 2H), 7.89 (d,  $J = 7.1$  Hz, 1H), 7.56 – 7.48 (m, 1H), 7.29 (d,  $J = 8.0$  Hz, 2H), 7.10 (t,  $J = 7.6$  Hz, 1H), 4.40 (t,  $J = 9.3$  Hz, 2H), 4.19 (t,  $J = 9.5$  Hz, 2H), 2.42 (s, 3H).

***N*-(2-(4,5-dihydrooxazol-2-yl)phenyl)-4-methoxybenzamide (1h)**

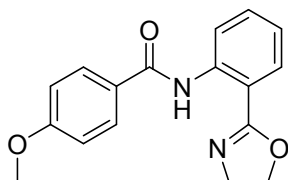

$^1\text{H}$  NMR (500 MHz,  $\text{CDCl}_3$ )  $\delta$  12.90 (s, 1H), 8.95 (d,  $J = 8.5$  Hz, 1H), 8.06 (d,  $J = 8.8$  Hz, 2H), 7.93 – 7.84 (m, 1H), 7.54 – 7.45 (m, 1H), 7.09 (t,  $J = 7.6$  Hz, 1H), 6.98 (d,  $J = 8.8$  Hz, 2H), 4.40 (t,  $J = 9.5$  Hz, 2H), 4.20 (t,  $J = 9.5$  Hz, 2H), 3.87 (s, 3H).

**4-Chloro-*N*-(2-(4,5-dihydrooxazol-2-yl)phenyl)benzamide (1i)**

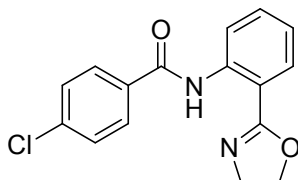

$^1\text{H}$  NMR (500 MHz,  $\text{CDCl}_3$ )  $\delta$  13.03 (s, 1H), 8.92 (d,  $J = 8.4$  Hz, 1H), 8.07 – 8.00 (m, 2H), 7.90 (dd,  $J = 7.9, 1.6$  Hz, 1H), 7.55 – 7.50 (m, 1H), 7.48 – 7.42 (m, 2H), 7.15 – 7.09 (m, 1H), 4.43 (dd,  $J = 14.4, 4.9$  Hz, 2H), 4.19 (t,  $J = 9.6$  Hz, 2H).

**4-Bromo-*N*-(2-(4,5-dihydrooxazol-2-yl)phenyl)benzamide (1j)**

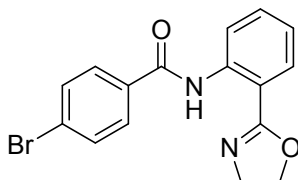

$^1\text{H}$  NMR (500 MHz,  $\text{CDCl}_3$ )  $\delta$  13.03 (s, 1H), 8.92 (d,  $J = 8.4$  Hz, 1H), 7.95 (d,  $J = 8.4$  Hz, 2H), 7.89 (d,  $J = 7.7$  Hz, 1H), 7.63 (d,  $J = 8.4$  Hz, 2H), 7.52 (t,  $J = 7.5$  Hz, 1H), 7.12 (t,  $J = 7.6$  Hz, 1H), 4.42 (t,  $J = 9.5$  Hz, 2H), 4.18 (t,  $J = 9.5$  Hz, 2H).

***N*-(2-(4,5-dihydrooxazol-2-yl)phenyl)-4-fluorobenzamide (1k)**

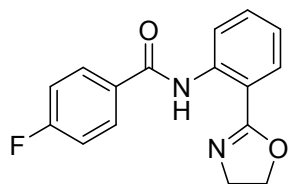

$^1\text{H NMR}$  (500 MHz,  $\text{CDCl}_3$ )  $\delta$  13.01 (s, 1H), 10.70 – 10.68 (m, 1H), 8.93 (d,  $J = 8.4$  Hz, 1H), 8.15 – 8.05 (m, 2H), 7.90 (dd,  $J = 7.9, 1.3$  Hz, 1H), 7.55 – 7.46 (m, 1H), 7.16 (t,  $J = 8.6$  Hz, 2H), 7.11 (t,  $J = 7.3$  Hz, 1H), 4.41 (t,  $J = 9.5$  Hz, 2H), 4.19 (t,  $J = 9.5$  Hz, 2H).

***N*-(2-(4,5-dihydrooxazol-2-yl)phenyl)-4-(trifluoromethyl)benzamide (1l)**

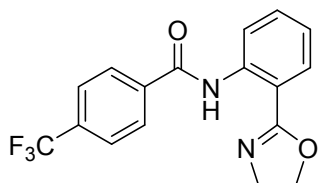

$^1\text{H NMR}$  (500 MHz,  $\text{CDCl}_3$ )  $\delta$  13.15 (s, 1H), 8.93 (d,  $J = 8.4$  Hz, 1H), 8.17 (d,  $J = 8.0$  Hz, 2H), 7.86 (d,  $J = 7.8$  Hz, 1H), 7.73 (d,  $J = 8.0$  Hz, 2H), 7.50 (t,  $J = 7.8$  Hz, 1H), 7.11 (t,  $J = 7.6$  Hz, 1H), 4.38 (t,  $J = 9.4$  Hz, 2H), 4.15 (t,  $J = 9.5$  Hz, 2H).

**2,4-Dichloro-*N*-(2-(4,5-dihydrooxazol-2-yl)phenyl)benzamide (1m)**

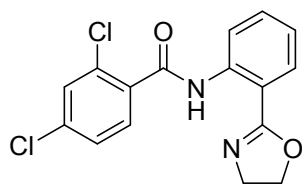

$^1\text{H NMR}$  (500 MHz,  $\text{CDCl}_3$ )  $\delta$  12.75 (s, 1H), 8.88 (d,  $J = 8.4$  Hz, 1H), 7.90 (dd,  $J = 7.9, 1.5$  Hz, 1H), 7.60 (d,  $J = 8.3$  Hz, 1H), 7.55 – 7.51 (m, 1H), 7.49 (d,  $J = 2.0$  Hz, 1H), 7.35 (dd,  $J = 8.3, 2.0$  Hz, 1H), 7.15 (td,  $J = 7.9, 1.1$  Hz, 1H), 4.38 (t,  $J = 9.6$  Hz, 2H), 4.05 (t,  $J = 9.5$  Hz, 2H).

***N*-(2-(4,5-dihydrooxazol-2-yl)phenyl)-2-naphthamide (1n)**

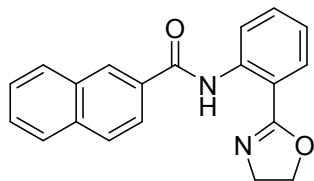

$^1\text{H NMR}$  (500 MHz,  $\text{CDCl}_3$ )  $\delta$  13.17 (s, 1H), 9.00 (d,  $J = 8.4$  Hz, 1H), 8.64 (s, 1H), 8.16 (dd,  $J = 8.6, 1.8$  Hz, 1H), 7.98 – 7.88 (m, 4H), 7.60 – 7.53 (m, 3H), 7.13 (td,  $J = 7.9, 1.1$  Hz, 1H), 4.49 – 4.40 (m, 2H), 4.24 (dd,  $J = 14.3, 5.1$  Hz, 2H).

***N*-(2-(4,5-dihydrooxazol-2-yl)phenyl)furan-2-carboxamide (1o)**

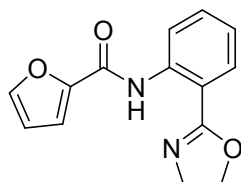

$^1\text{H NMR}$  (500 MHz,  $\text{CDCl}_3$ )  $\delta$  13.05 (s, 1H), 8.85 (dd,  $J = 8.3, 3.8$  Hz, 1H), 7.80 (ddd,  $J = 19.5, 16.8, 5.8$  Hz, 2H), 7.58 – 7.40 (m, 2H), 7.15 – 6.95 (m, 2H), 4.37 (dd,  $J = 20.4, 10.3$  Hz, 2H), 4.23 – 4.09 (m, 2H).

***N*-(2-(4,5-dihydrooxazol-2-yl)phenyl)thiophene-2-carboxamide (1p)**

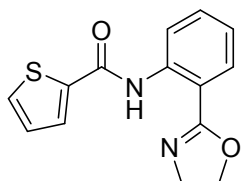

$^1\text{H NMR}$  (500 MHz,  $\text{CDCl}_3$ )  $\delta$  13.08 (s, 1H), 8.86 (d,  $J = 8.5$  Hz, 1H), 7.92 – 7.86 (m, 1H), 7.82 – 7.77 (m, 1H), 7.55 (d,  $J = 4.9$  Hz, 1H), 7.52 – 7.47 (m, 1H), 7.15 (dd,  $J = 4.8, 3.9$  Hz, 1H), 7.10 (t,  $J = 7.6$  Hz, 1H), 4.43 (t,  $J = 9.4$  Hz, 2H), 4.23 (t,  $J = 9.6$  Hz, 2H).

***N*-(2-(4,5-dihydrooxazol-2-yl)phenyl)cyclohexanecarboxamide (1r)**

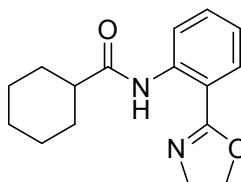

$^1\text{H NMR}$  (500 MHz,  $\text{CDCl}_3$ )  $\delta$  12.11 (s, 1H), 8.78 (dd,  $J = 8.5, 0.8$  Hz, 1H), 7.85 (dd,  $J = 7.9, 1.5$  Hz, 1H), 7.50 – 7.40 (m, 1H), 7.10 – 7.00 (m, 1H), 4.39 (t,  $J = 9.4$  Hz, 2H), 4.17 (t,  $J = 9.6$  Hz, 2H), 2.32 (ddd,  $J = 11.7, 7.6, 3.5$  Hz, 1H), 2.01 (dd,  $J = 13.7, 1.9$  Hz, 2H), 1.82 (d,  $J = 2.5$  Hz, 2H), 1.74 – 1.68 (m, 1H), 1.58 (ddd,  $J = 24.7, 12.4, 3.1$  Hz, 2H), 1.37 – 1.24 (m, 3H).

***N*-(2-(4,5-dihydrooxazol-2-yl)phenyl)cyclobutanecarboxamide (1s)**

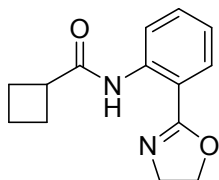

$^1\text{H NMR}$  (500 MHz,  $\text{CDCl}_3$ )  $\delta$  12.10 (s, 1H), 8.78 (d,  $J = 8.5$  Hz, 1H), 7.84 (dd,  $J = 7.9, 1.3$  Hz, 1H), 7.45 (dd,  $J = 11.5, 4.3$  Hz, 1H), 7.10 – 7.00 (m, 1H), 4.38 (t,  $J = 9.4$  Hz, 2H), 4.13 (dd,  $J = 20.0, 10.3$  Hz, 2H), 3.26 (p,  $J = 8.6$  Hz, 1H), 2.43 (dtd,  $J = 18.2, 9.2, 2.3$  Hz, 2H), 2.33 – 2.20 (m, 2H), 2.07 – 1.85 (m, 2H).

***N*-(2-(4,5-dihydrooxazol-2-yl)phenyl)cyclopropanecarboxamide (1t)**

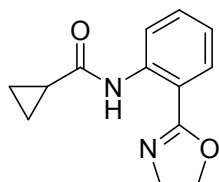

$^1\text{H}$  NMR (500 MHz,  $\text{CDCl}_3$ )  $\delta$  12.41 (s, 1H), 8.73 (dd,  $J = 8.5, 0.7$  Hz, 1H), 7.86 (dd,  $J = 7.9, 1.6$  Hz, 1H), 7.48 – 7.41 (m, 1H), 7.05 (td,  $J = 8.0, 1.1$  Hz, 1H), 4.40 (dd,  $J = 14.4, 5.0$  Hz, 2H), 4.17 (t,  $J = 9.6$  Hz, 2H), 1.66 (tt,  $J = 7.9, 4.6$  Hz, 1H), 1.15 – 1.06 (m, 2H), 0.90 – 0.82 (m, 2H).

***N*-(2-(4,5-dihydrooxazol-2-yl)phenyl)-2-phenylacetamide (1u)**

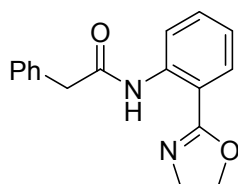

$^1\text{H}$  NMR (500 MHz,  $\text{CDCl}_3$ )  $\delta$  12.11 (s, 1H), 8.76 (d,  $J = 8.5$  Hz, 1H), 7.79 (dd,  $J = 7.9, 1.5$  Hz, 1H), 7.45 – 7.40 (m, 1H), 7.39 – 7.33 (m, 4H), 7.30 – 7.26 (m, 1H), 7.06 – 7.01 (m, 1H), 4.28 (td,  $J = 9.5, 2.1$  Hz, 2H), 3.88 (td,  $J = 9.5, 1.6$  Hz, 2H), 3.77 (s, 2H).

***N*-(2-(4,5-dihydrooxazol-2-yl)phenyl)propionamide (1w)**

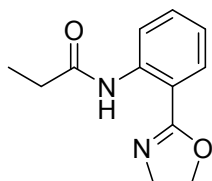

$^1\text{H}$  NMR (500 MHz,  $\text{CDCl}_3$ )  $\delta$  12.15 (s, 1H), 8.76 (d,  $J = 8.4$  Hz, 1H), 7.85 (d,  $J = 7.5$  Hz, 1H), 7.45 (t,  $J = 7.6$  Hz, 1H), 7.06 (t,  $J = 7.6$  Hz, 1H), 4.38 (t,  $J = 9.5$  Hz, 2H), 4.15 (t,  $J = 9.5$  Hz, 2H), 2.47 (q,  $J = 7.6$  Hz, 2H), 1.27 (t,  $J = 7.6$  Hz, 3H).

***N*-(2-(4,5-dihydrooxazol-2-yl)phenyl)octanamide (1x)**

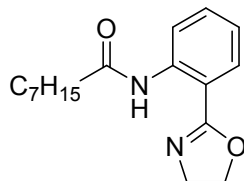

$^1\text{H}$  NMR (500 MHz,  $\text{CDCl}_3$ )  $\delta$  12.15 (s, 1H), 8.76 (d,  $J = 8.4$  Hz, 1H), 7.85 (dd,  $J = 7.9, 1.1$  Hz, 1H), 7.51 – 7.40 (m, 1H), 7.05 (t,  $J = 7.6$  Hz, 1H), 4.37 (t,  $J = 9.5$  Hz, 2H), 4.14 (t,  $J = 9.5$  Hz, 2H), 2.42 (t,  $J = 7.6$  Hz, 2H), 1.80 – 1.70 (m, 2H), 1.39 – 1.26 (m, 8H), 0.88 (t,  $J = 6.7$  Hz, 3H).

***N*-(2-(4,5-dihydrooxazol-2-yl)phenyl)tetradecanamide (1y)**

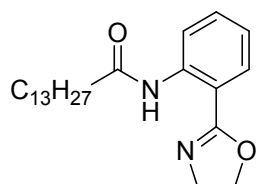

$^1\text{H}$  NMR (500 MHz,  $\text{CDCl}_3$ )  $\delta$  12.15 (s, 1H), 8.76 (d,  $J = 8.3$  Hz, 1H), 7.84 (d,  $J = 7.5$  Hz, 1H), 7.44 (t,  $J = 7.4$  Hz, 1H), 7.05 (t,  $J = 7.2$  Hz, 1H), 4.37 (t,  $J = 9.2$  Hz, 2H), 4.14 (t,  $J = 9.2$  Hz, 2H), 2.42 (t,  $J = 7.3$  Hz, 2H), 1.83 – 1.71 (m, 2H), 1.37 (s, 2H), 1.25 (s, 17H), 0.88 (t,  $J = 6.1$  Hz, 4H).

**(3r,5r,7r)-*N*-(2-(4,5-dihydrooxazol-2-yl)phenyl)adamantane-1-carboxamide (1z)**

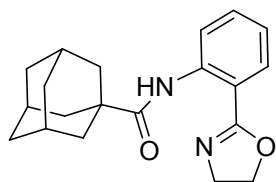

$^1\text{H}$  NMR (500 MHz,  $\text{CDCl}_3$ )  $\delta$  12.12 (s, 1H), 8.81 (dd,  $J = 8.5, 0.7$  Hz, 1H), 7.85 (dd,  $J = 7.9, 1.5$  Hz, 1H), 7.48 – 7.40 (m, 1H), 7.09 – 7.00 (m, 1H), 4.40 (t,  $J = 9.4$  Hz, 2H), 4.18 (t,  $J = 9.5$  Hz, 2H), 2.09 (s, 3H), 2.02 (d,  $J = 2.6$  Hz, 6H), 1.75 (d,  $J = 13.8$  Hz, 6H).

***N*-(2-(4,5-dihydrooxazol-2-yl)-3-fluorophenyl)benzamide (1aa)**

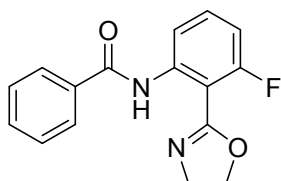

$^1\text{H}$  NMR (500 MHz,  $\text{CDCl}_3$ )  $\delta$  13.01 (s, 1H), 8.74 (d,  $J = 8.5$  Hz, 1H), 8.11 – 7.99 (m, 2H), 7.59 – 7.42 (m, 4H), 6.91 – 6.82 (m, 1H), 4.48 (t,  $J = 9.7$  Hz, 2H), 4.14 (t,  $J = 9.7$  Hz, 2H).

***N*-(2-(4,5-dihydrooxazol-2-yl)-4-methoxyphenyl)benzamide (1ab)**

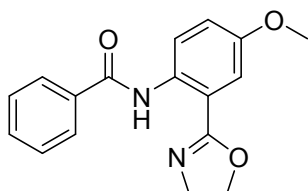

$^1\text{H}$  NMR (500 MHz,  $\text{CDCl}_3$ )  $\delta$  12.79 (s, 1H), 8.91 (d,  $J = 9.2$  Hz, 1H), 8.10 – 8.02 (m, 2H), 7.53 – 7.46 (m, 3H), 7.42 (d,  $J = 3.0$  Hz, 1H), 7.09 (dd,  $J = 9.2, 3.0$  Hz, 1H), 4.41 (t,  $J = 9.6$  Hz, 2H), 4.20 (t,  $J = 9.4$  Hz, 2H), 3.83 (s, 3H).



***N*-(2-(4,5-dihydrooxazol-2-yl)-5-methylphenyl)benzamide (1ac)**

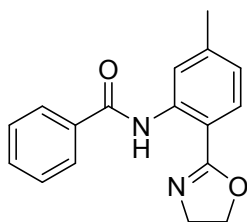

$^1\text{H}$  NMR (500 MHz,  $\text{CDCl}_3$ )  $\delta$  13.00 (s, 1H), 8.82 (s, 1H), 8.10 (d,  $J = 7.9$  Hz, 2H), 7.76 (d,  $J = 8.0$  Hz, 1H), 7.49 (dd,  $J = 14.3, 6.7$  Hz, 3H), 6.91 (d,  $J = 7.9$  Hz, 1H), 4.36 (t,  $J = 9.4$  Hz, 2H), 4.15 (t,  $J = 9.4$  Hz, 2H), 2.42 (s, 3H).

***N*-(5-chloro-2-(4,5-dihydrooxazol-2-yl)phenyl)benzamide (1ad)**

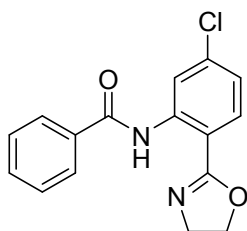

$^1\text{H}$  NMR (500 MHz,  $\text{CDCl}_3$ )  $\delta$  13.07 (s, 1H), 9.07 (d,  $J = 1.9$  Hz, 1H), 8.08 (d,  $J = 7.3$  Hz, 2H), 7.81 (d,  $J = 8.5$  Hz, 1H), 7.57 – 7.46 (m, 3H), 7.08 (dd,  $J = 8.5, 1.9$  Hz, 1H), 4.42 (t,  $J = 9.5$  Hz, 2H), 4.20 (t,  $J = 9.5$  Hz, 2H).

***N*-(2-(4,5-dihydrooxazol-2-yl)-5-fluorophenyl)benzamide (1ae)**

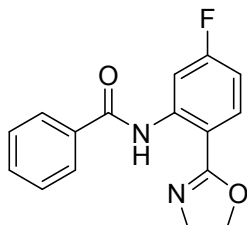

$^1\text{H}$  NMR (500 MHz,  $\text{CDCl}_3$ )  $\delta$  13.01 (s, 1H), 8.75 (d,  $J = 8.5$  Hz, 1H), 8.08 – 7.99 (m, 2H), 7.58 – 7.44 (m, 4H), 6.86 (ddd,  $J = 11.5, 8.3, 0.9$  Hz, 1H), 4.49 (t,  $J = 9.8$  Hz, 2H), 4.15 (t,  $J = 9.7$  Hz, 2H), 3.75 (t,  $J = 5.7$  Hz, 1H).

***N*-(2-(4,5-dihydrooxazol-2-yl)-5-methylphenyl)cyclohexanecarboxamide (1ag)**

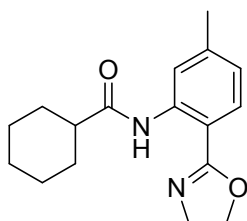

$^1\text{H}$  NMR (500 MHz,  $\text{CDCl}_3$ )  $\delta$  12.08 (s, 1H), 8.64 (s, 1H), 7.72 (d,  $J = 8.0$  Hz, 1H), 6.90 – 6.81 (m, 1H), 4.36 (t,  $J = 9.5$  Hz, 2H), 4.14 (t,  $J = 9.5$  Hz, 2H), 2.37 (s, 3H), 2.31 (ddd,  $J = 11.6, 7.6, 3.5$  Hz, 1H), 2.00 (dd,  $J = 13.5, 2.0$  Hz, 2H), 1.87 – 1.79 (m, 2H), 1.74 – 1.67 (m, 1H), 1.58 (qd,  $J = 12.4, 3.1$  Hz, 2H), 1.39 – 1.25 (m, 3H).

### *N*-(5-chloro-2-(4,5-dihydrooxazol-2-yl)phenyl)furan-2-carboxamide (**1ah**)

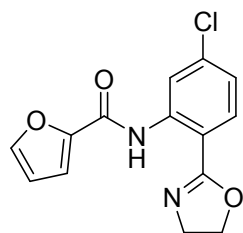

<sup>1</sup>H NMR (500 MHz, CDCl<sub>3</sub>) δ 13.05 (s, 1H), 8.96 (d, *J* = 2.1 Hz, 1H), 7.78 (d, *J* = 8.5 Hz, 1H), 7.57 (d, *J* = 0.8 Hz, 1H), 7.22 (d, *J* = 3.4 Hz, 1H), 7.06 (dd, *J* = 8.5, 2.1 Hz, 1H), 6.54 (dd, *J* = 3.5, 1.7 Hz, 1H), 4.41 (dd, *J* = 14.4, 4.9 Hz, 2H), 4.21 (t, *J* = 9.4 Hz, 2H).

### *N*-(2-(4,5-dihydrooxazol-2-yl)phenyl)acetamide (**1aj**)

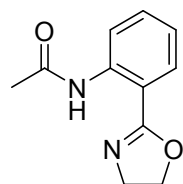

<sup>1</sup>H NMR (500 MHz, CDCl<sub>3</sub>) δ 12.17 (s, 1H), 8.72 (d, *J* = 8.4 Hz, 1H), 7.84 (d, *J* = 7.7 Hz, 1H), 7.45 (t, *J* = 7.7 Hz, 1H), 7.05 (t, *J* = 7.5 Hz, 1H), 4.36 (t, *J* = 9.4 Hz, 2H), 4.13 (t, *J* = 9.4 Hz, 2H), 3.60 – 3.58 (m, 1H), 2.21 (s, 3H).

## 3. Optimization of reaction conditions

### The effect of ratios of mixed solvents on the reaction<sup>a,b</sup>

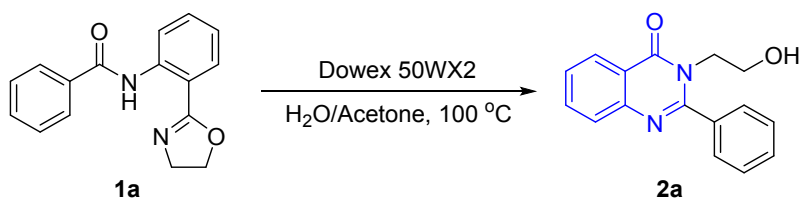

| Entry | H <sub>2</sub> O/Acetone (v/v) | Yield [%] <sup>b</sup> |
|-------|--------------------------------|------------------------|
| 1     | 19:1                           | 45                     |
| 2     | 14:1                           | 72                     |
| 3     | 9:1                            | 83                     |
| 4     | 4:1                            | 82                     |
| 5     | 1:1                            | 85                     |

<sup>a</sup> Reaction conditions: **1a** (0.3 mmol), dowex 50WX2 (150 mg), H<sub>2</sub>O/Acetone (5.0 mL), 100 °C, 6 h, air. <sup>b</sup> Isolated yields.

### The effect of strong acids on the reaction<sup>a,b</sup>

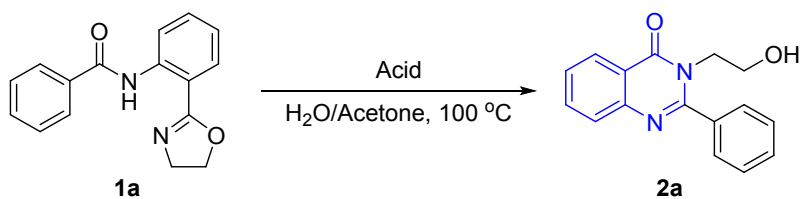

| Entry          | Deviation from initial conditions                            | Yield [%] <sup>b</sup> |
|----------------|--------------------------------------------------------------|------------------------|
| 1              | none                                                         | 83                     |
| 2 <sup>c</sup> | dowex 50WX2 was replaced with HCl                            | 57                     |
| 3 <sup>d</sup> | dowex 50WX2 was replaced with H <sub>2</sub> SO <sub>4</sub> | 45                     |

<sup>a</sup> Reaction conditions: **1a** (0.3 mmol), dowex 50WX2 (150 mg), H<sub>2</sub>O/Acetone (5.0 mL, v/v = 9:1), 100 °C, 6 h, air. <sup>b</sup> Isolated yields. <sup>c</sup> HCl (12 M) (0.3 mmol). <sup>d</sup> H<sub>2</sub>SO<sub>4</sub> (18.4 M) (0.3 mmol).

## 4. X-ray Crystal Data for 2a

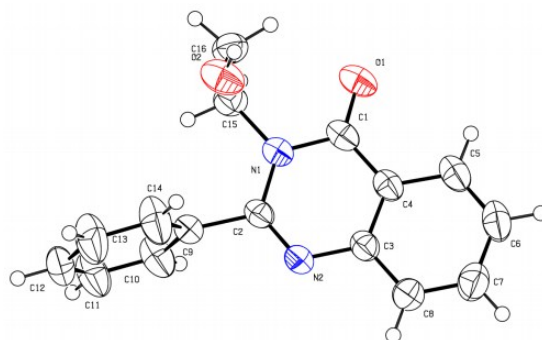

**Figure 1** Single-crystal X-ray structure of **2a**. Ellipsoids are represented at 30% probability.

**Table S1.** Crystallographic data and structure refinement for **2a**

|                                       |                                                            |
|---------------------------------------|------------------------------------------------------------|
| CCDC                                  | 1959603                                                    |
| Empirical formula                     | $C_{16}H_{14}N_2O_2$                                       |
| Formula weight                        | 266.29                                                     |
| Temperature K                         | 296.15                                                     |
| Wavelength Å                          | 0.71073                                                    |
| Crystal system                        | Triclinic                                                  |
| Space group                           | P-1                                                        |
| $a, b, c$ Å                           | 4.9529 (7), 11.1696 (16), 13.2334 (19)                     |
| $\alpha, \beta, \gamma$ °             | 112.6230 (10), 99.490 (2), 94.354 (2)                      |
| Volume Å <sup>3</sup>                 | 658.67 (16)                                                |
| $Z$                                   | 2                                                          |
| Calculated density, Mg/m <sup>3</sup> | 1.343                                                      |
| $F(000)$                              | 280                                                        |
| Theta range for data collection °     | 1.705 to 27.744                                            |
| Limiting indices                      | $-6 \leq h \leq 6, -14 \leq k \leq 13, -16 \leq l \leq 16$ |
| Reflections collected / unique        | 5331 / 2834 [R(int) = 0.0150]                              |
| Absorption correction                 | Semi-empirical from equivalents                            |
| Refinement method                     | Full-matrix least-squares on $F^2$                         |
| Data / restraints / parameters        | 2834 / 0 / 181                                             |
| Goodness of fit on $F^2$              | 1.064                                                      |

## 5. Copies of <sup>1</sup>H, <sup>13</sup>C and <sup>19</sup>F NMR Spectra

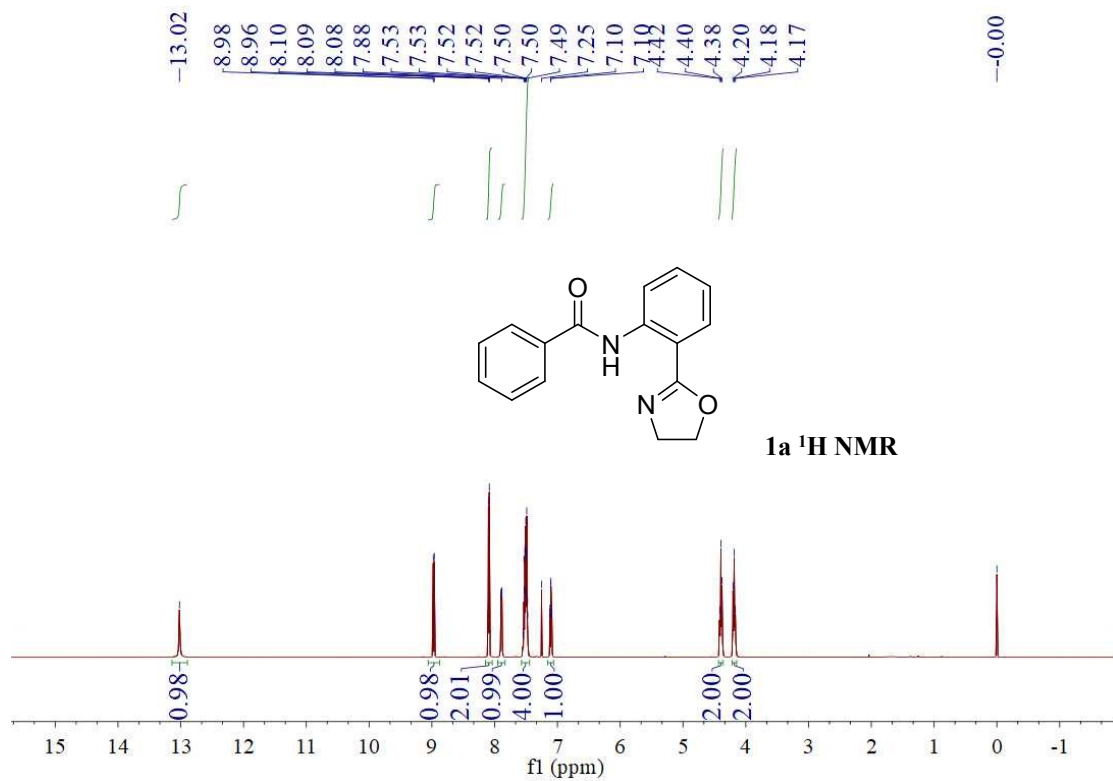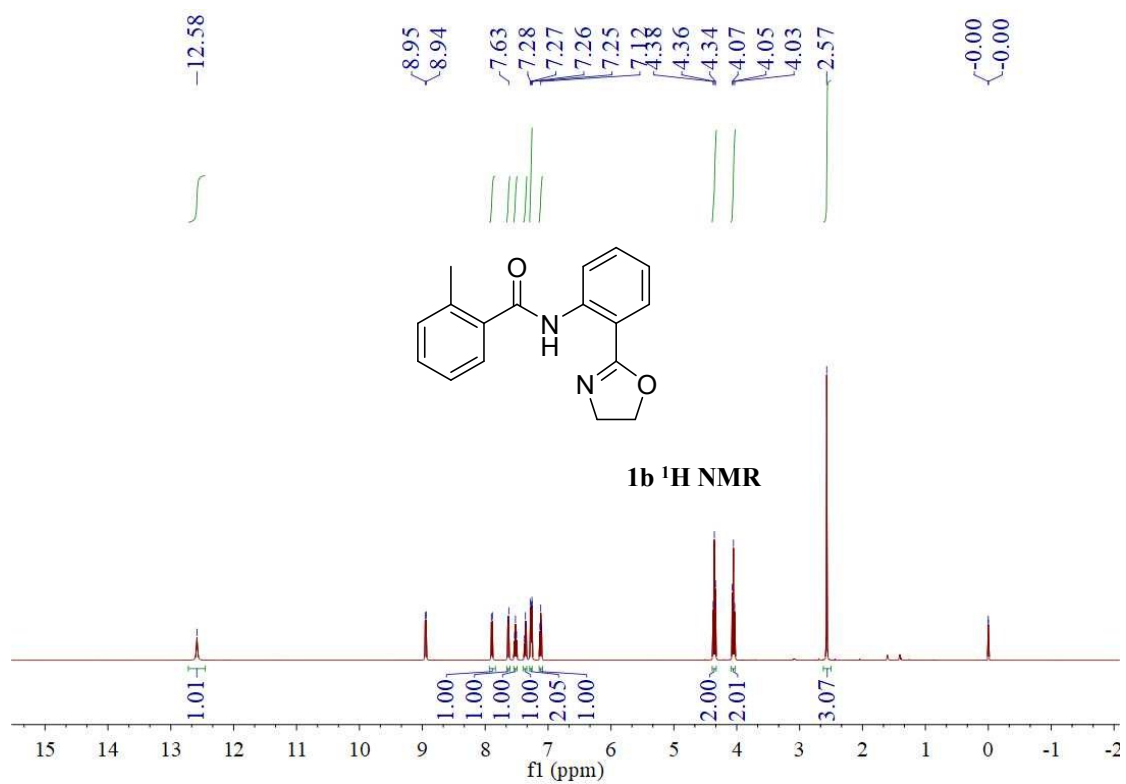

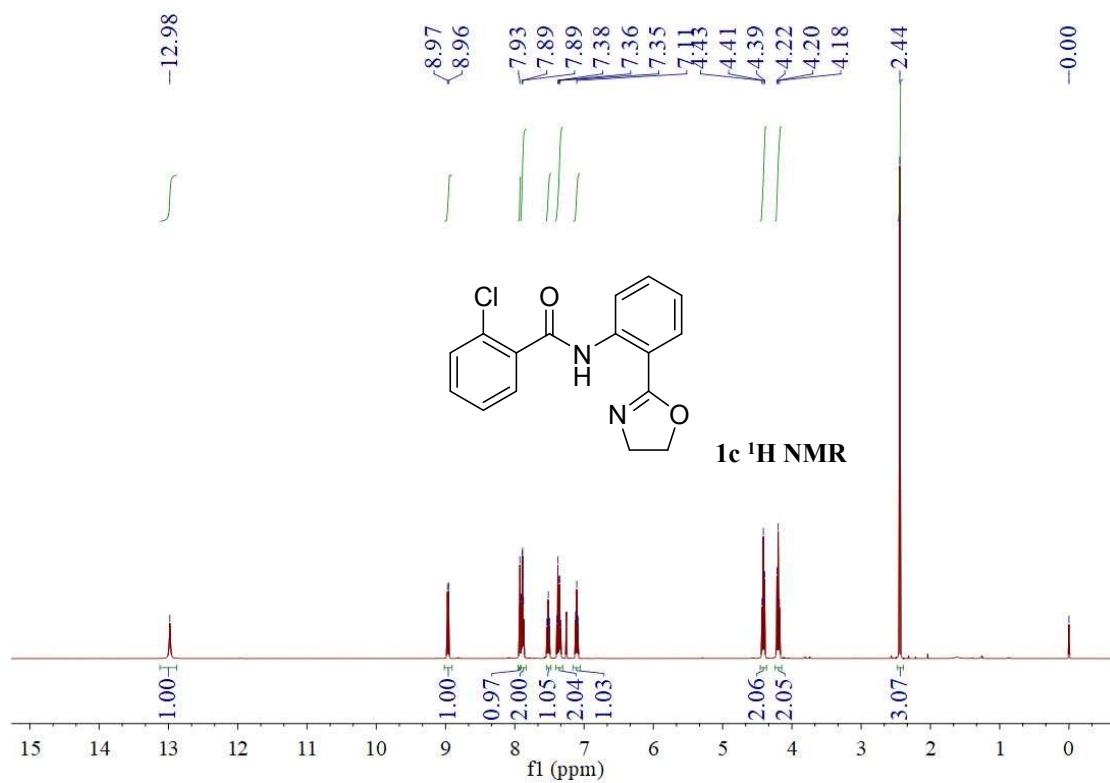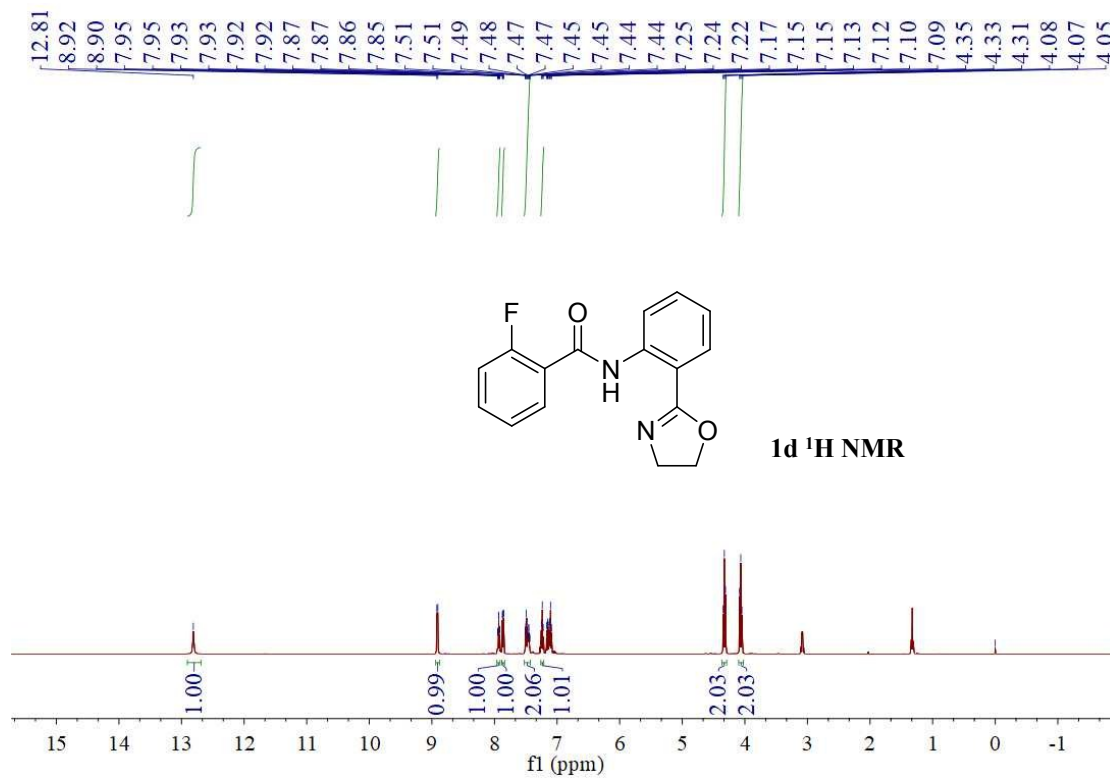

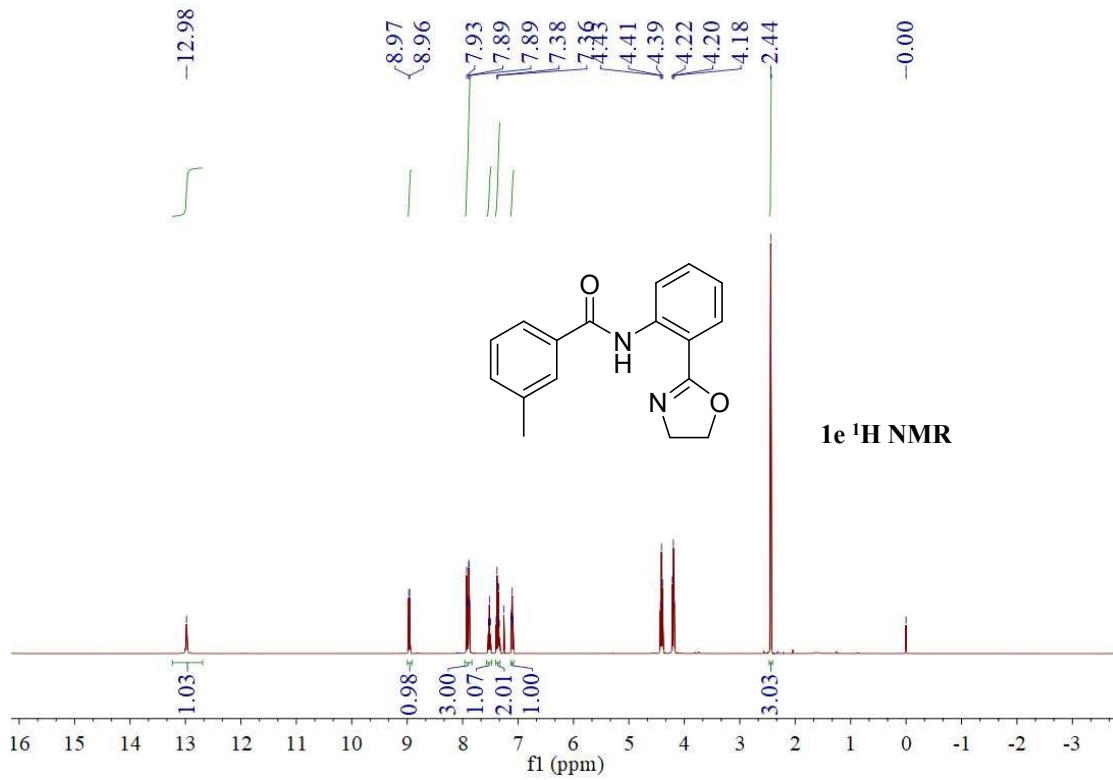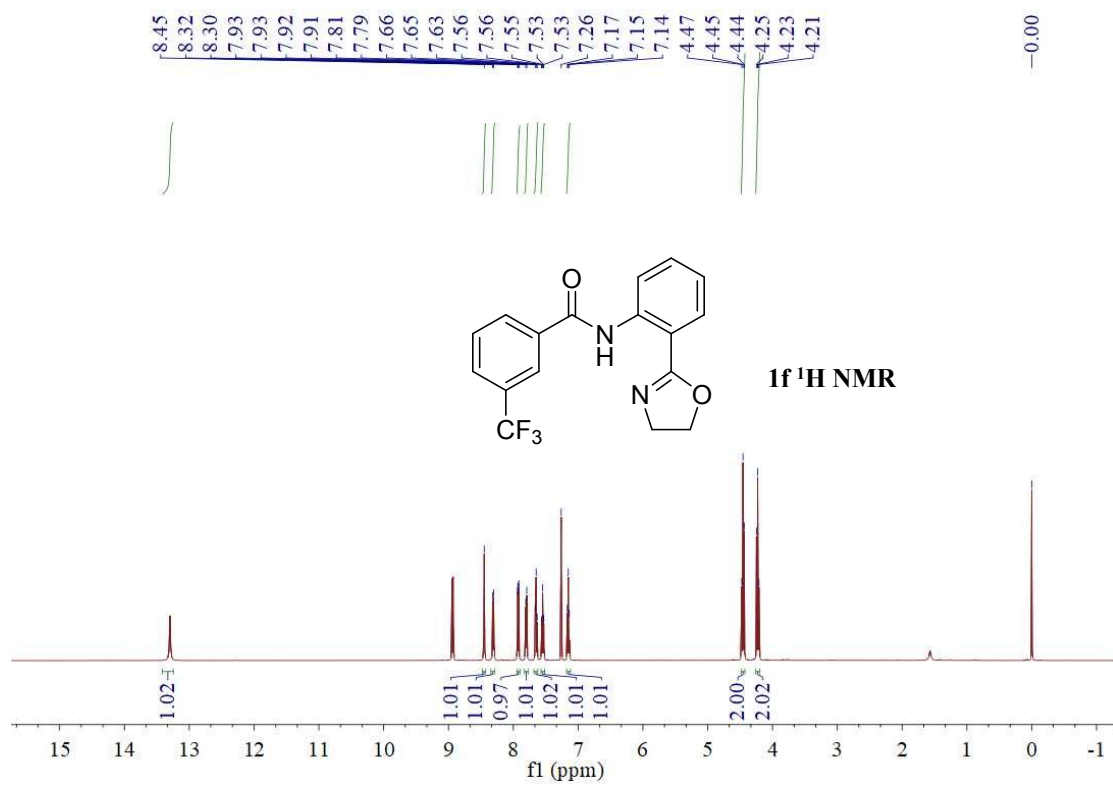

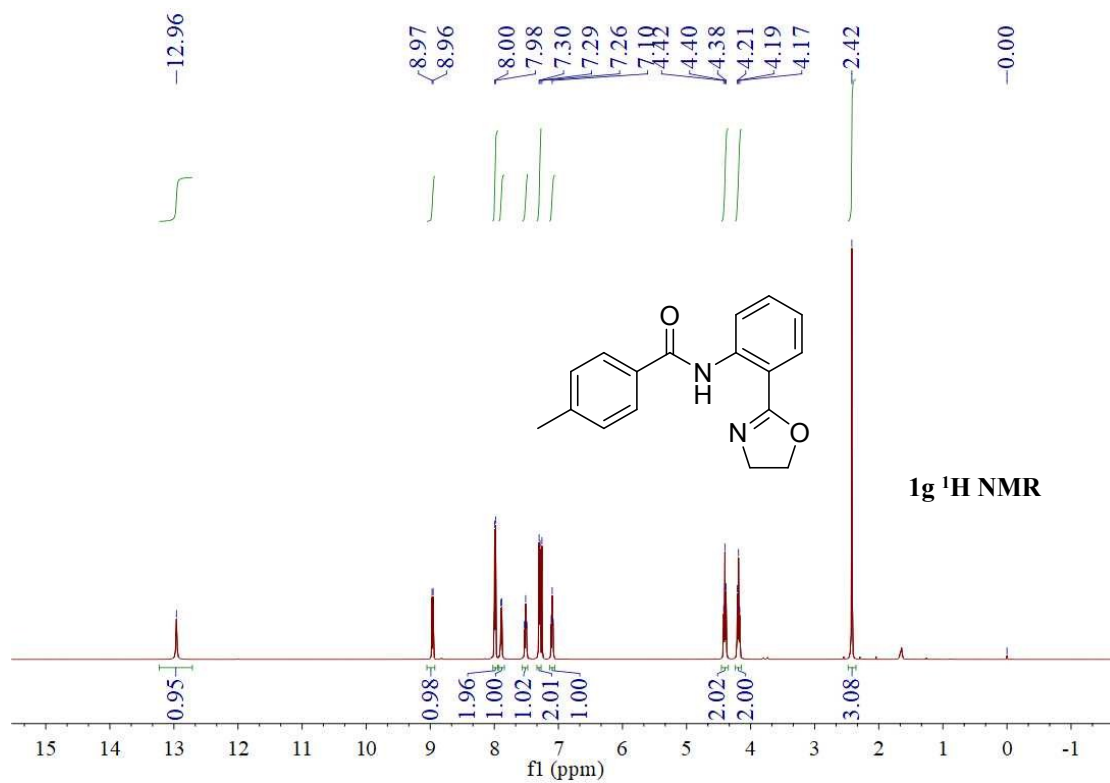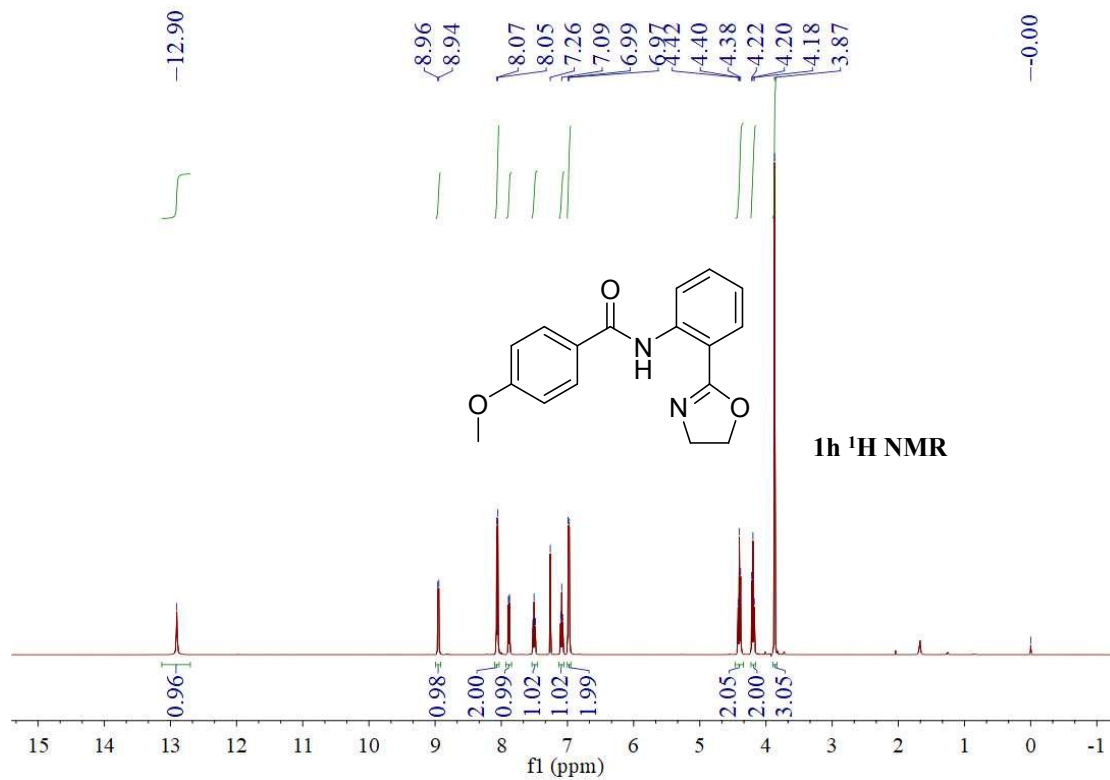



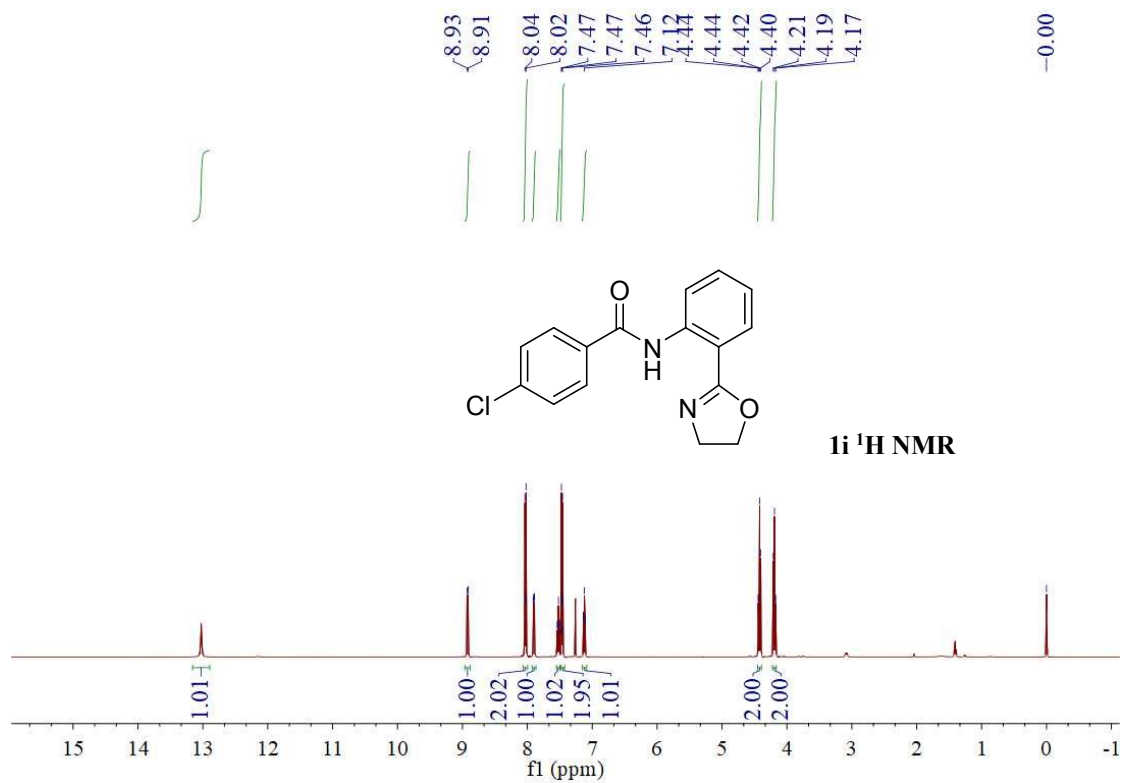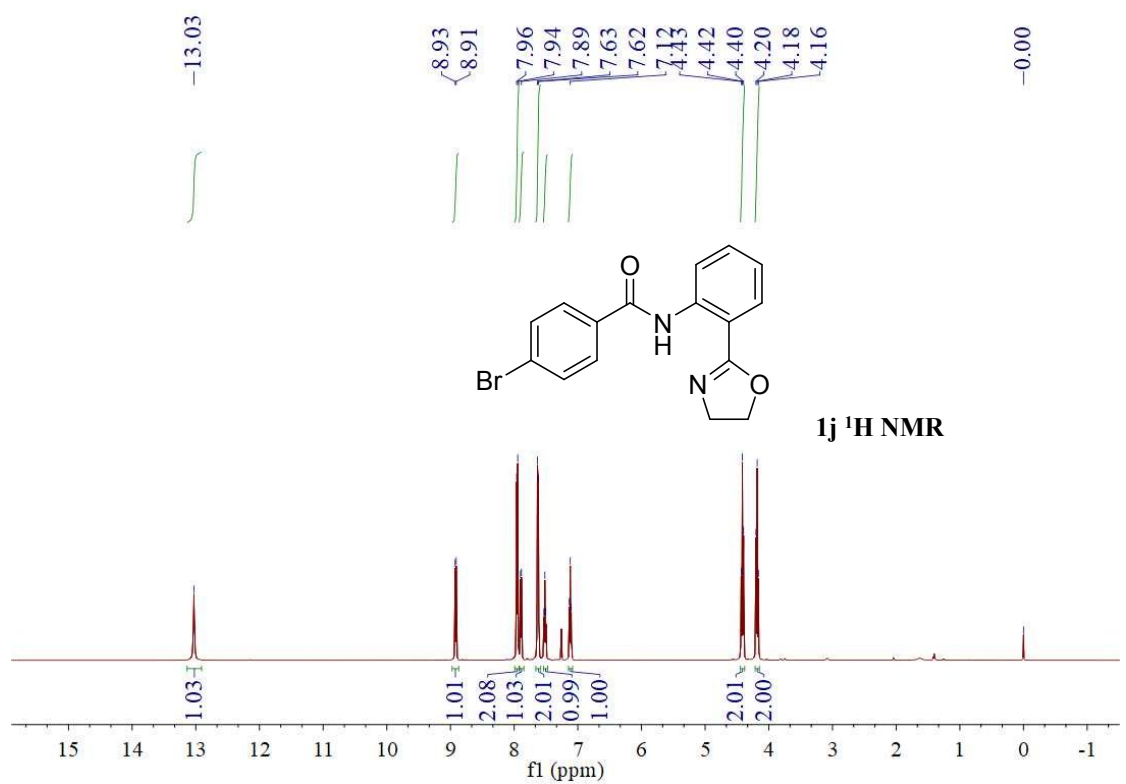

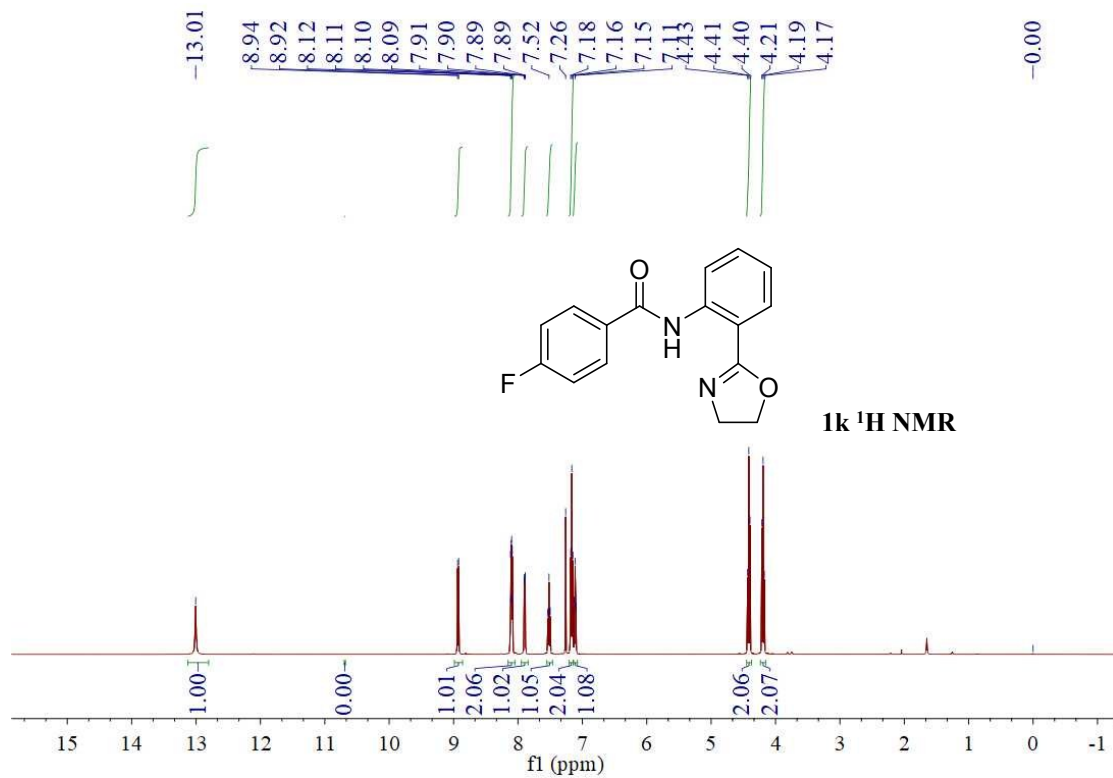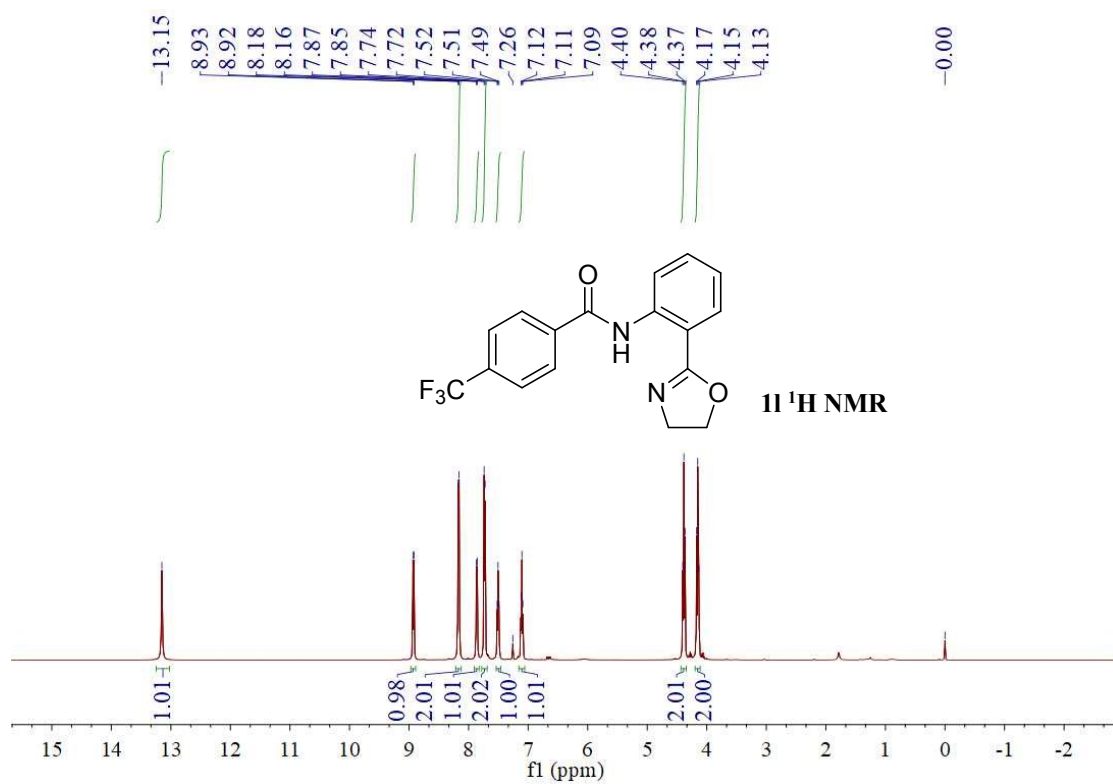

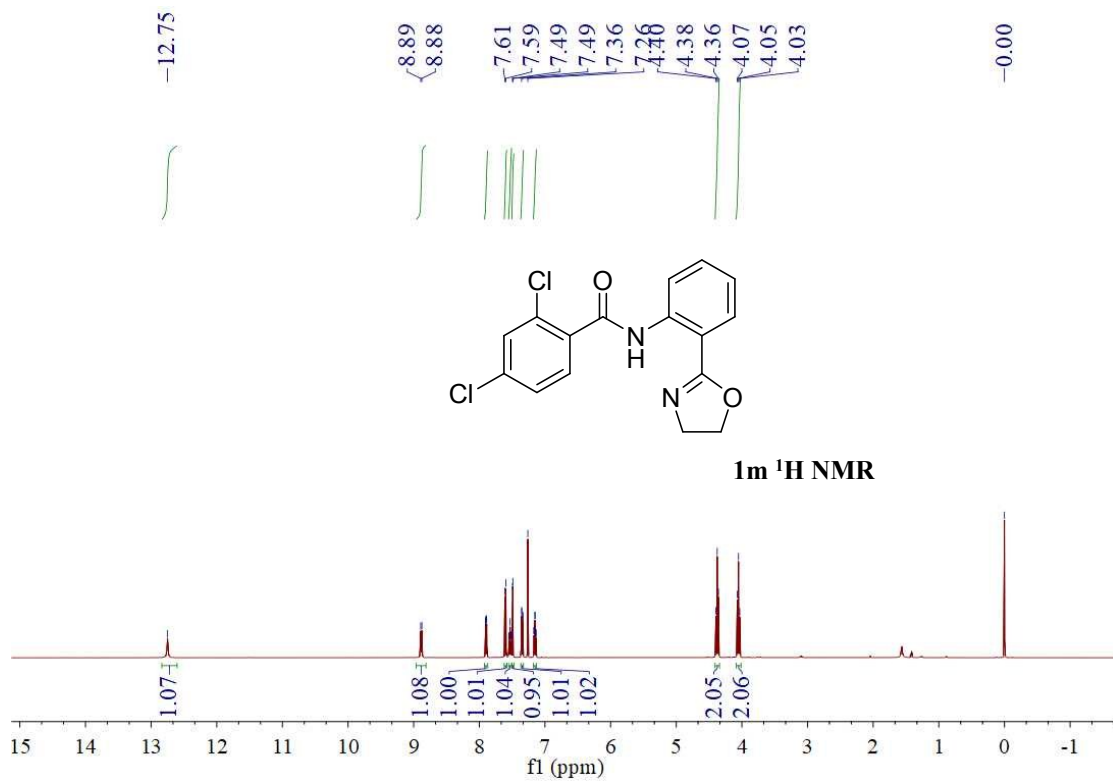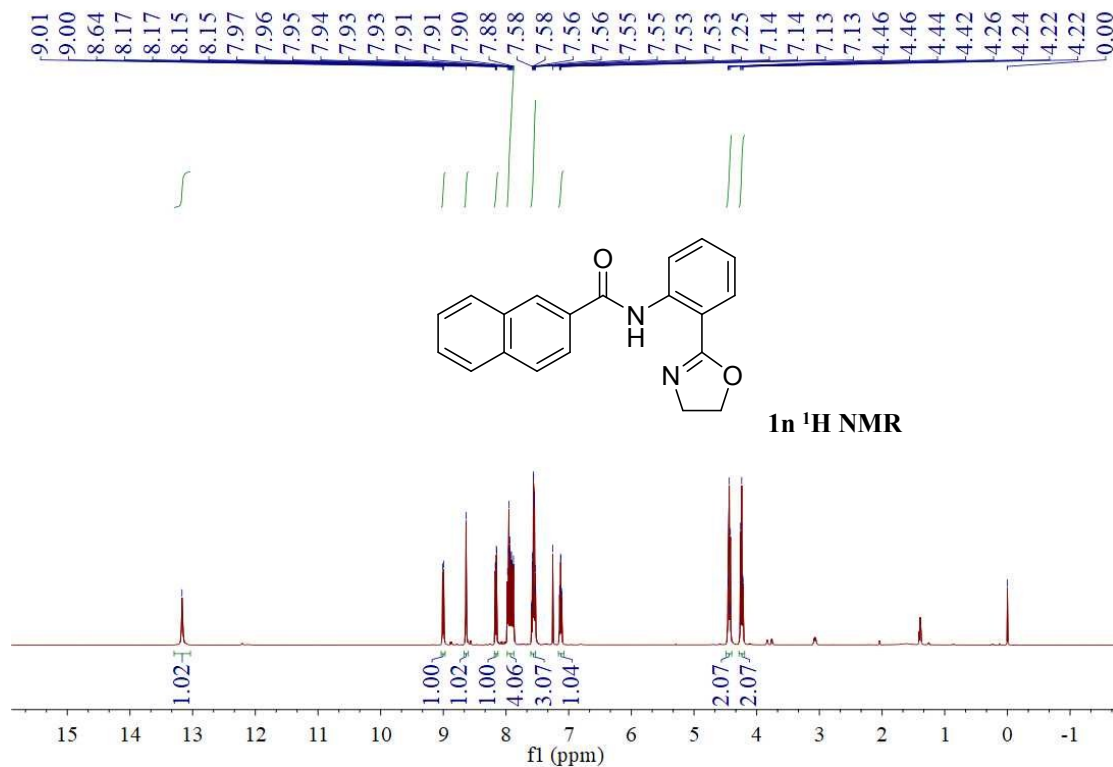

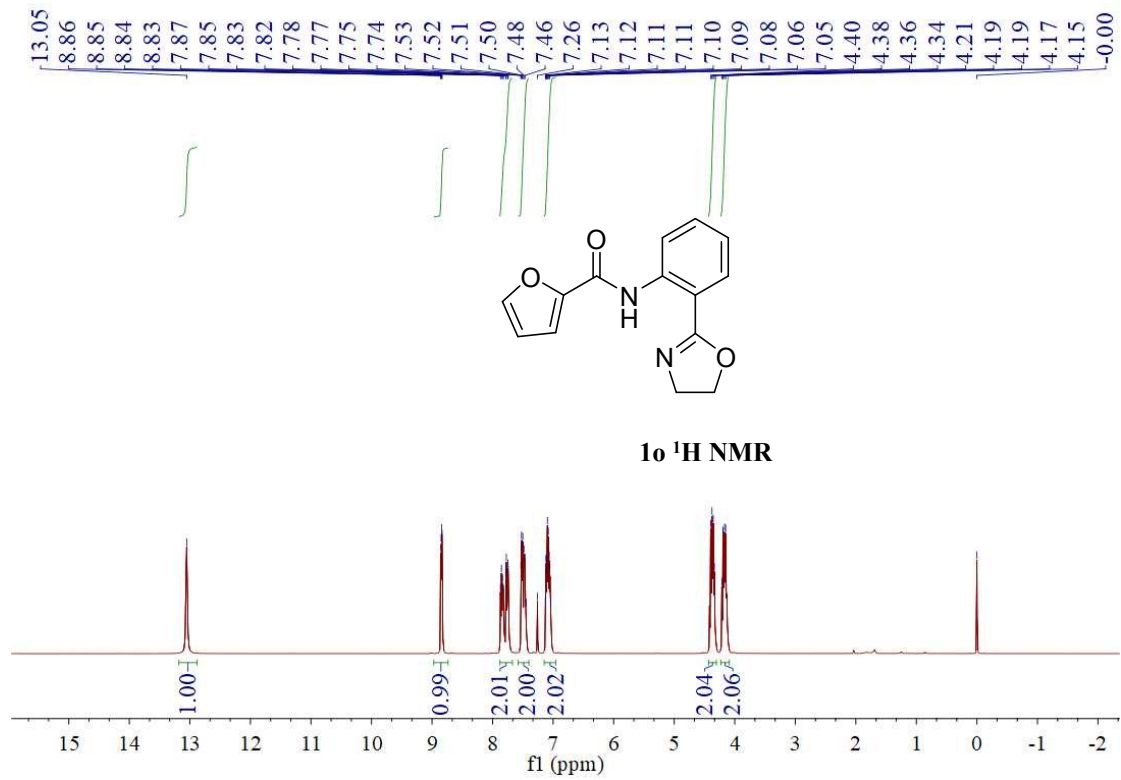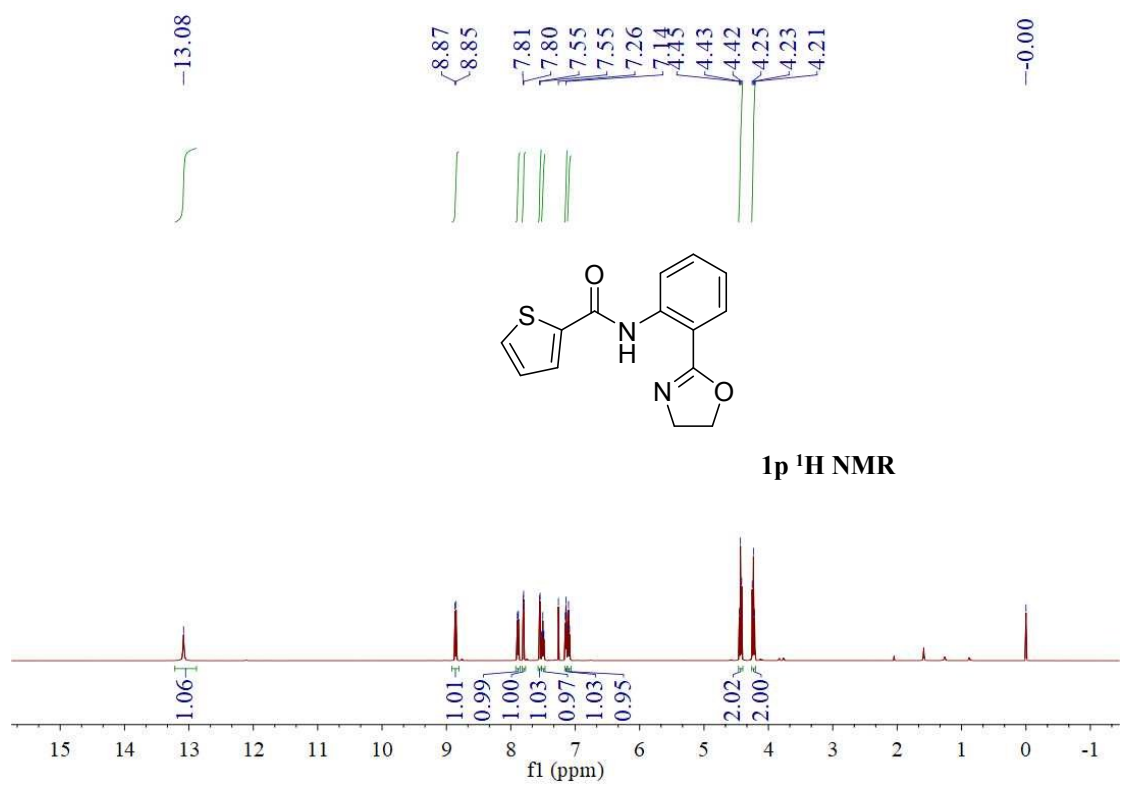

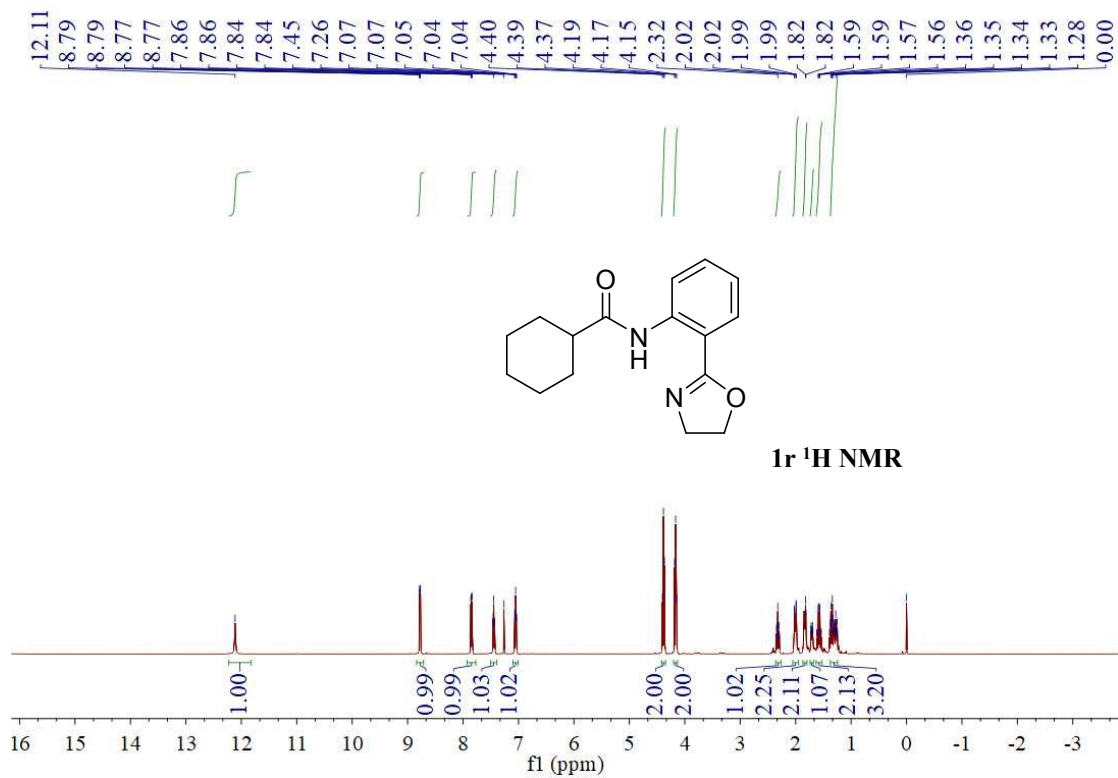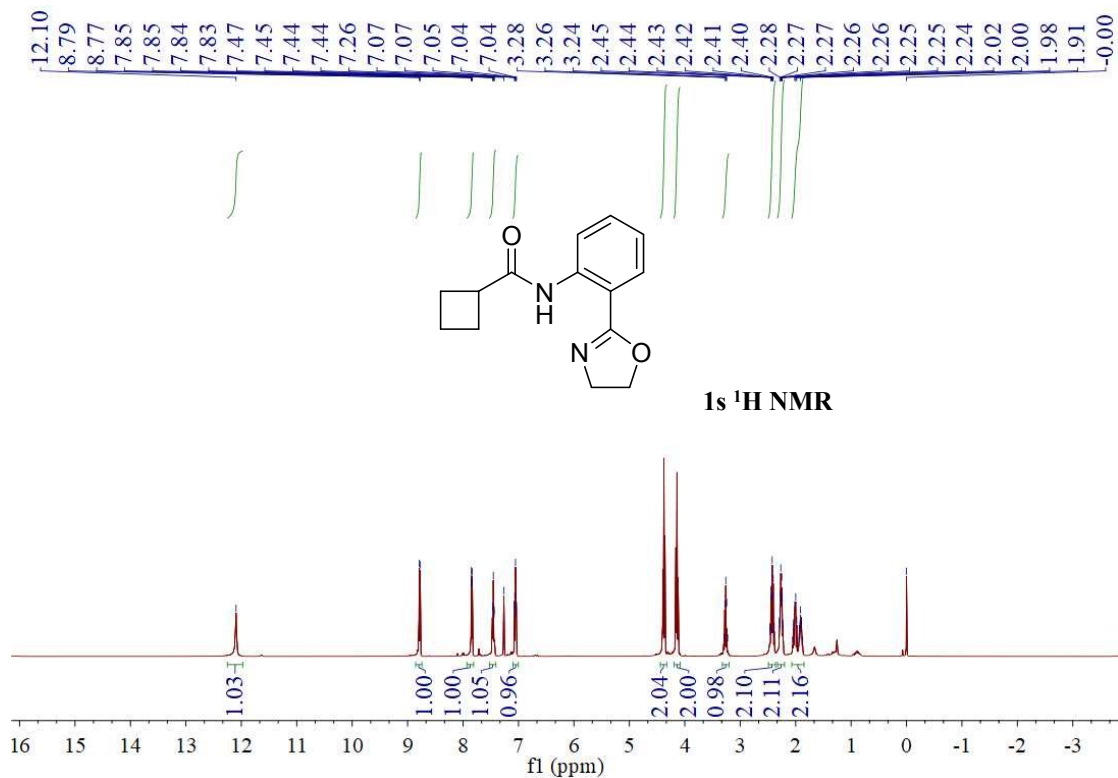

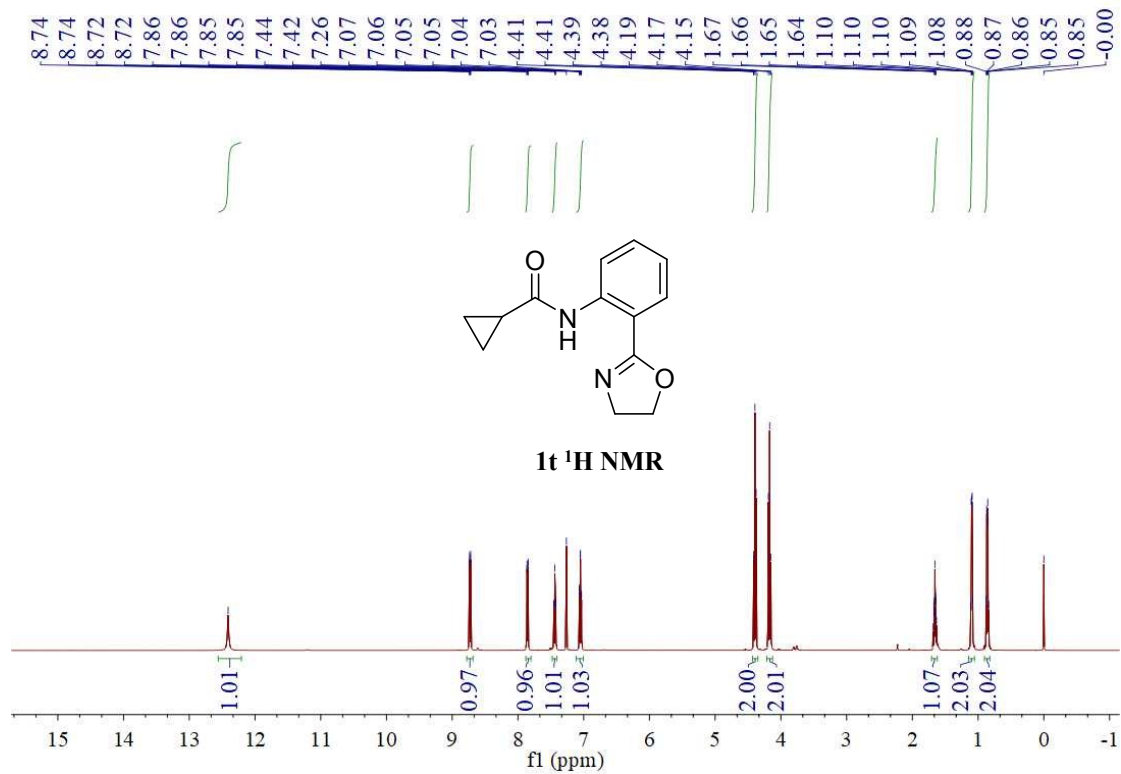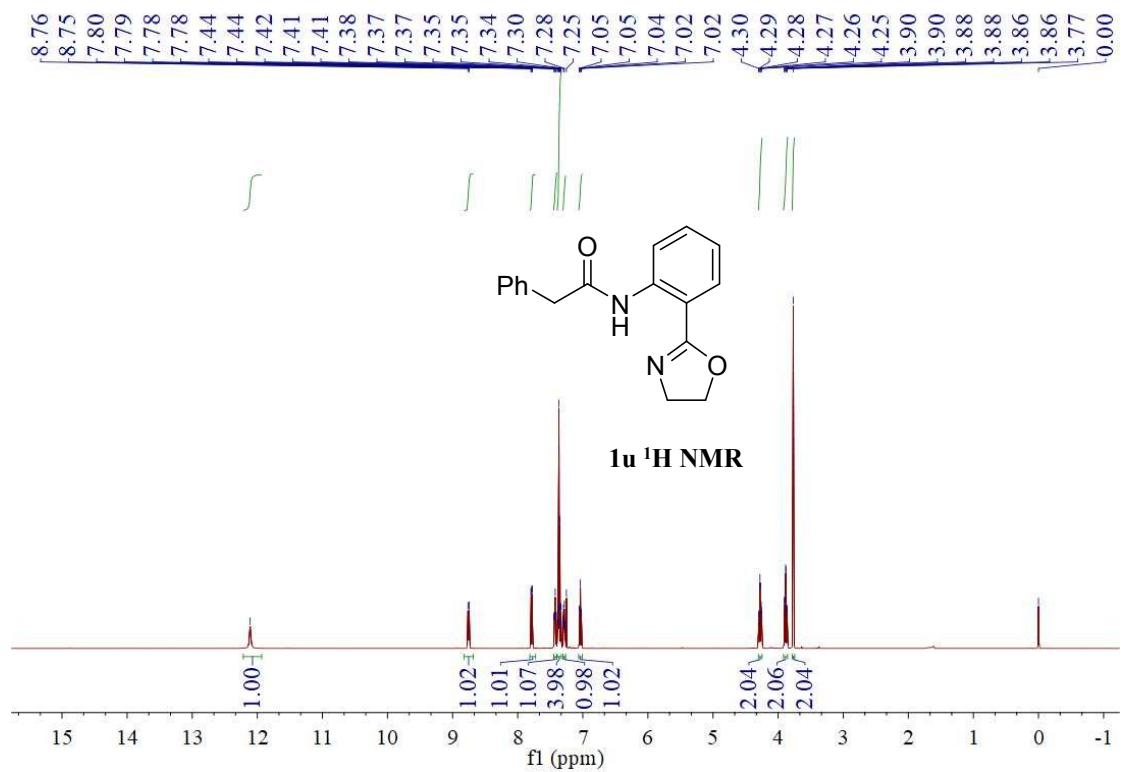

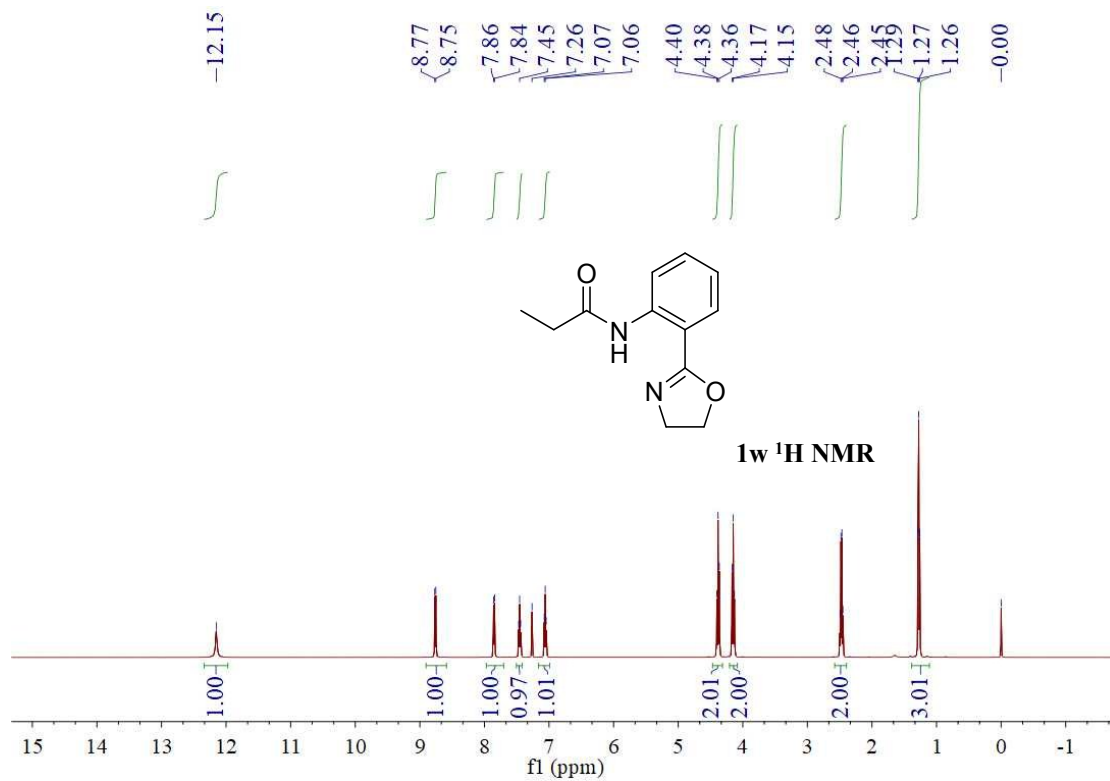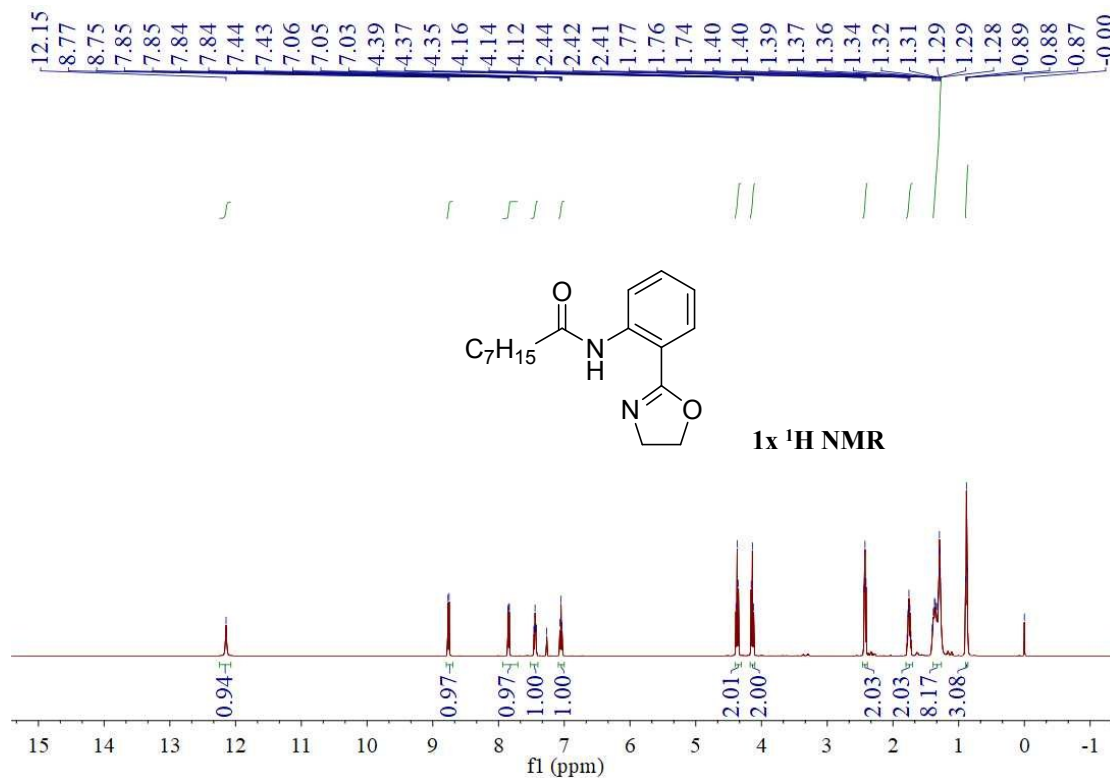

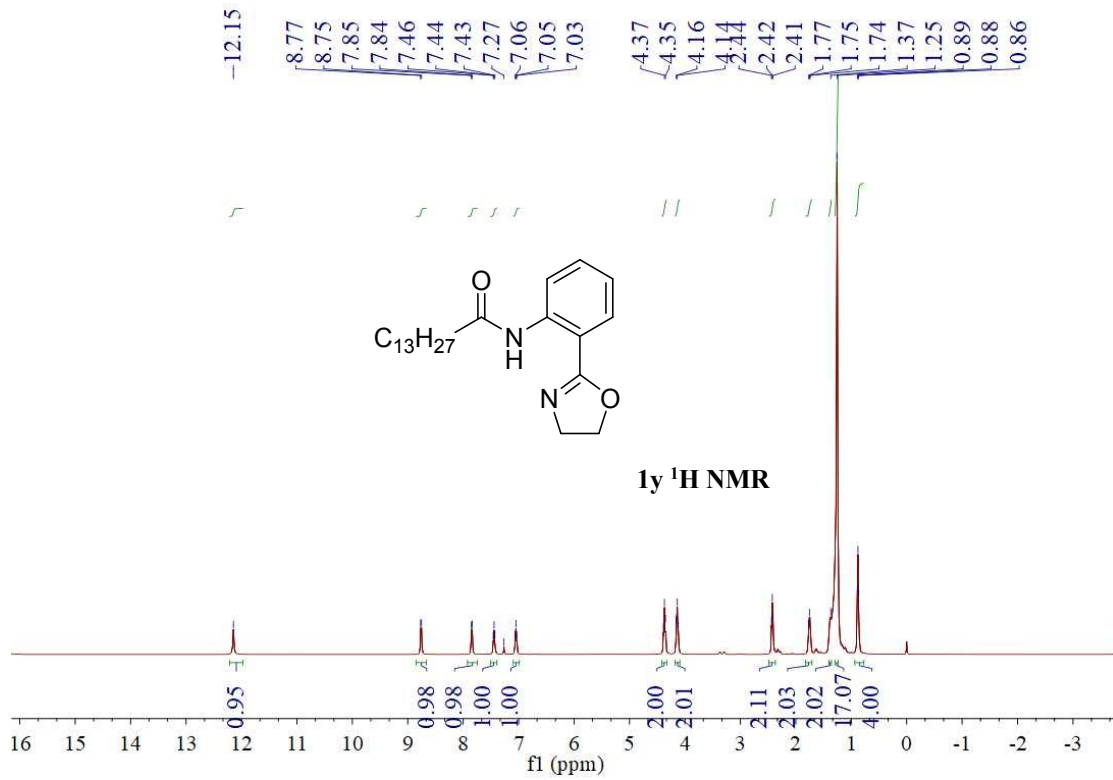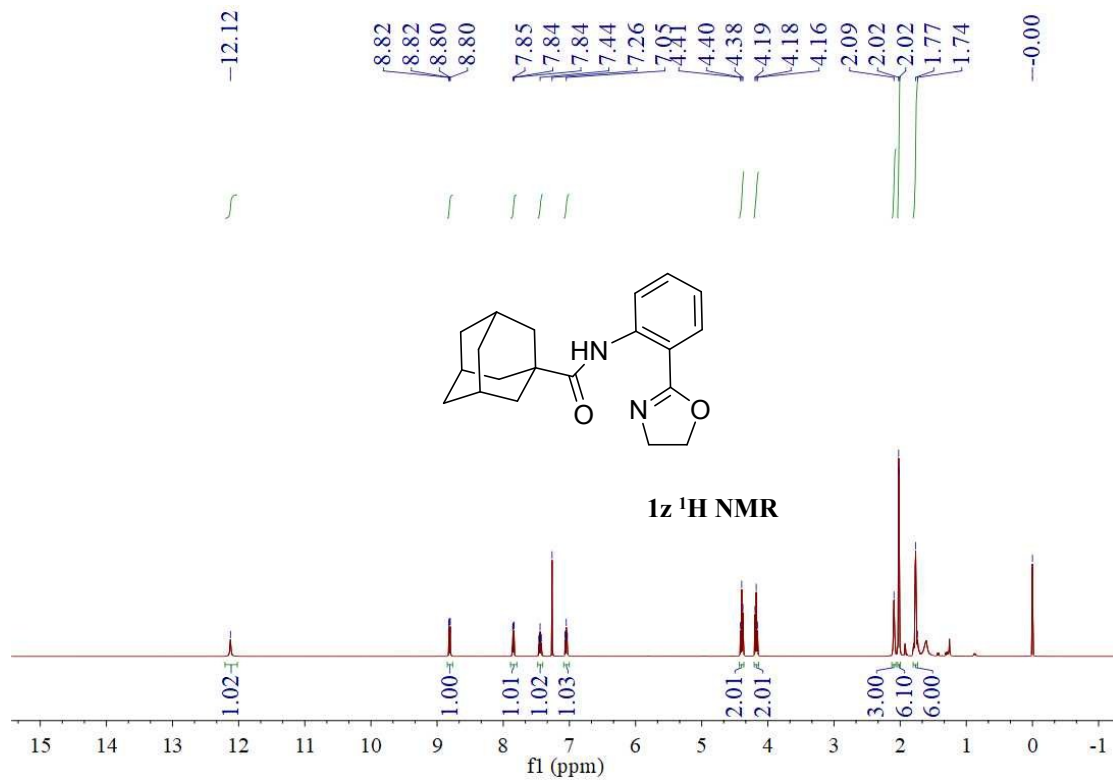



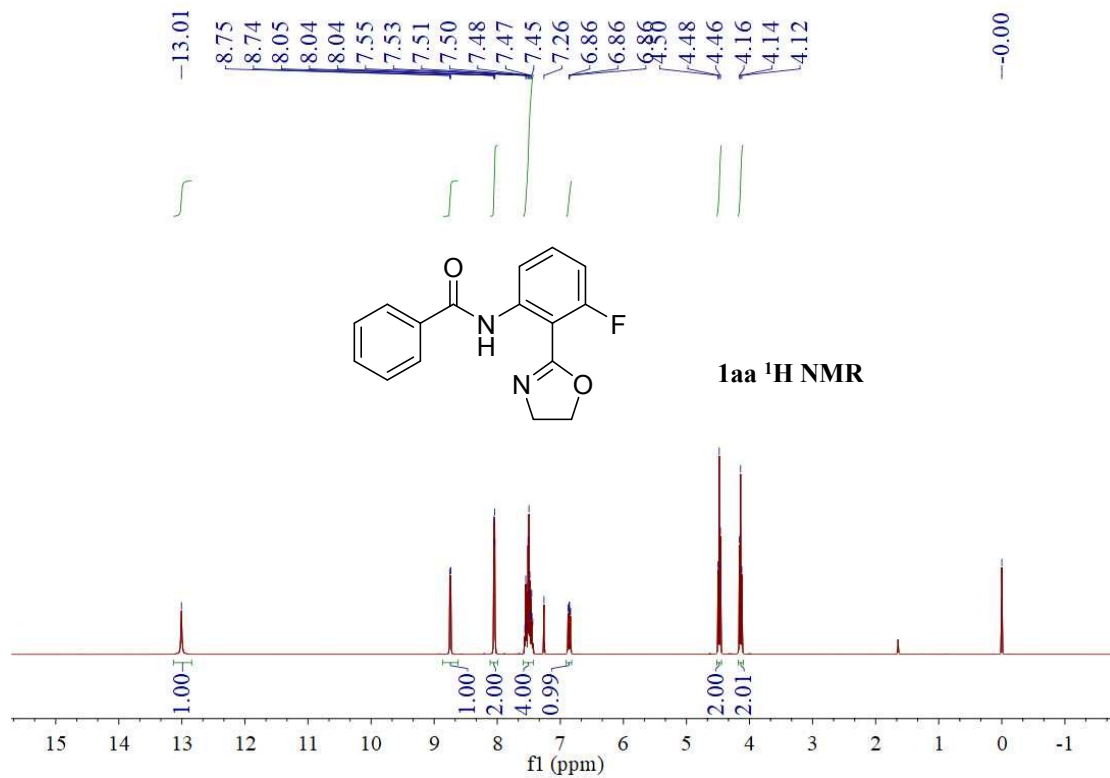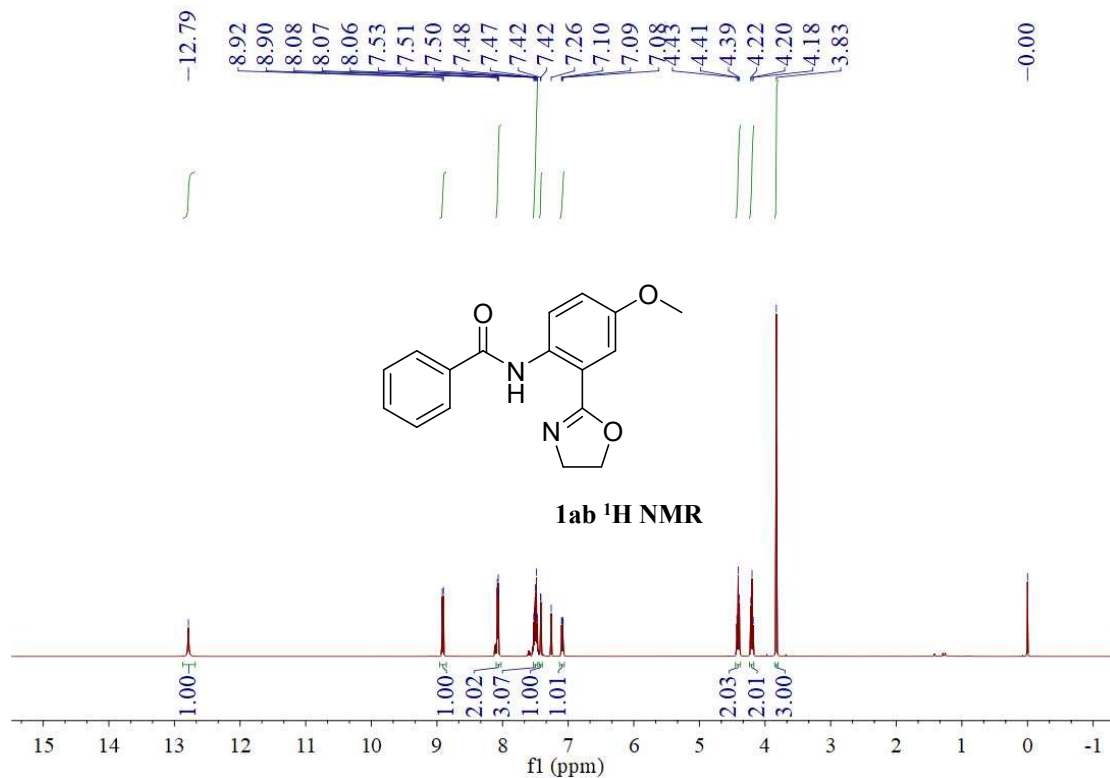

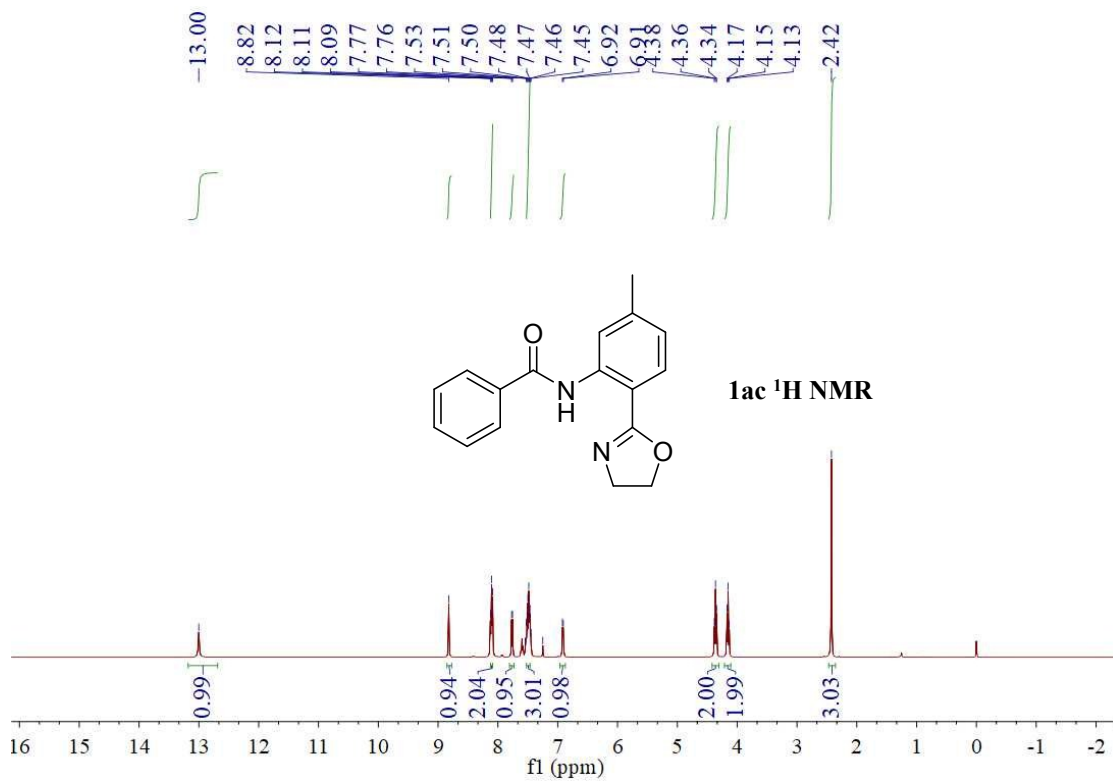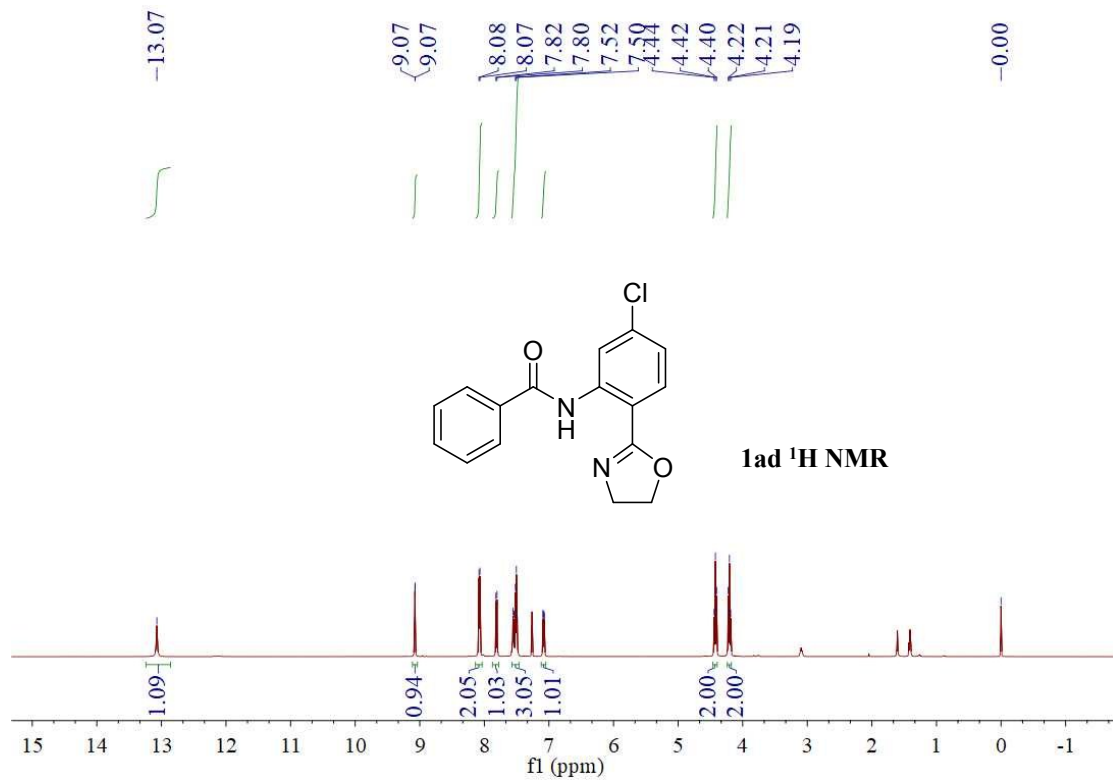

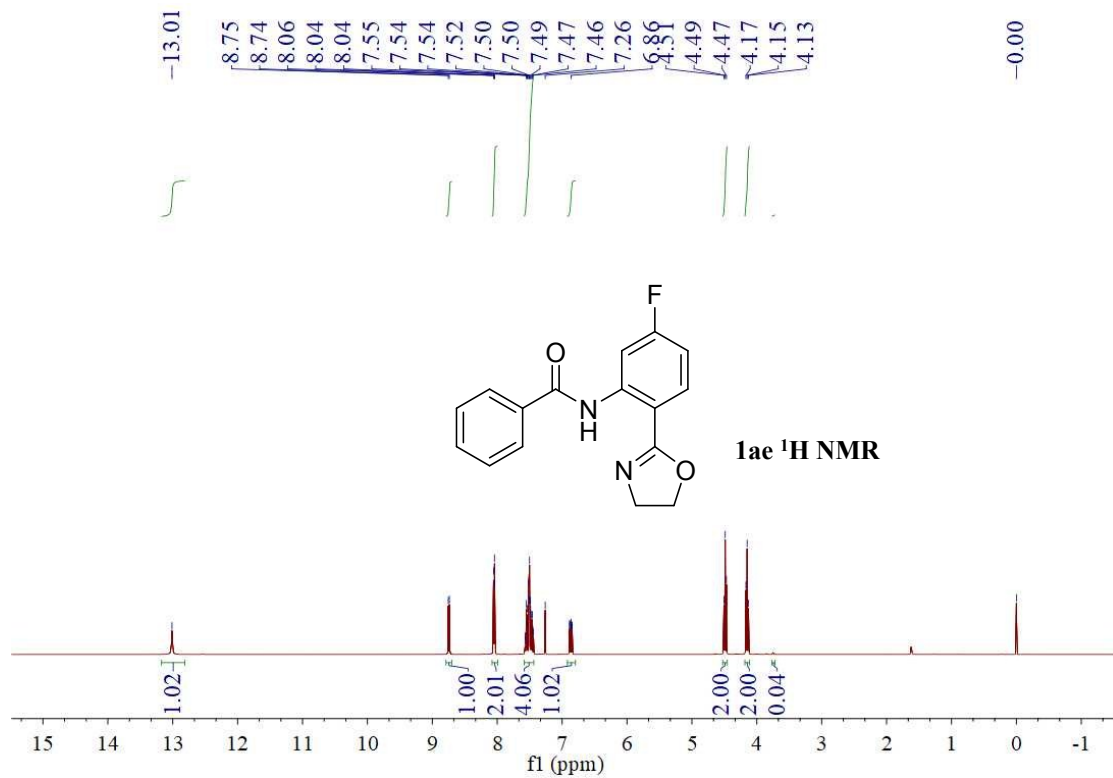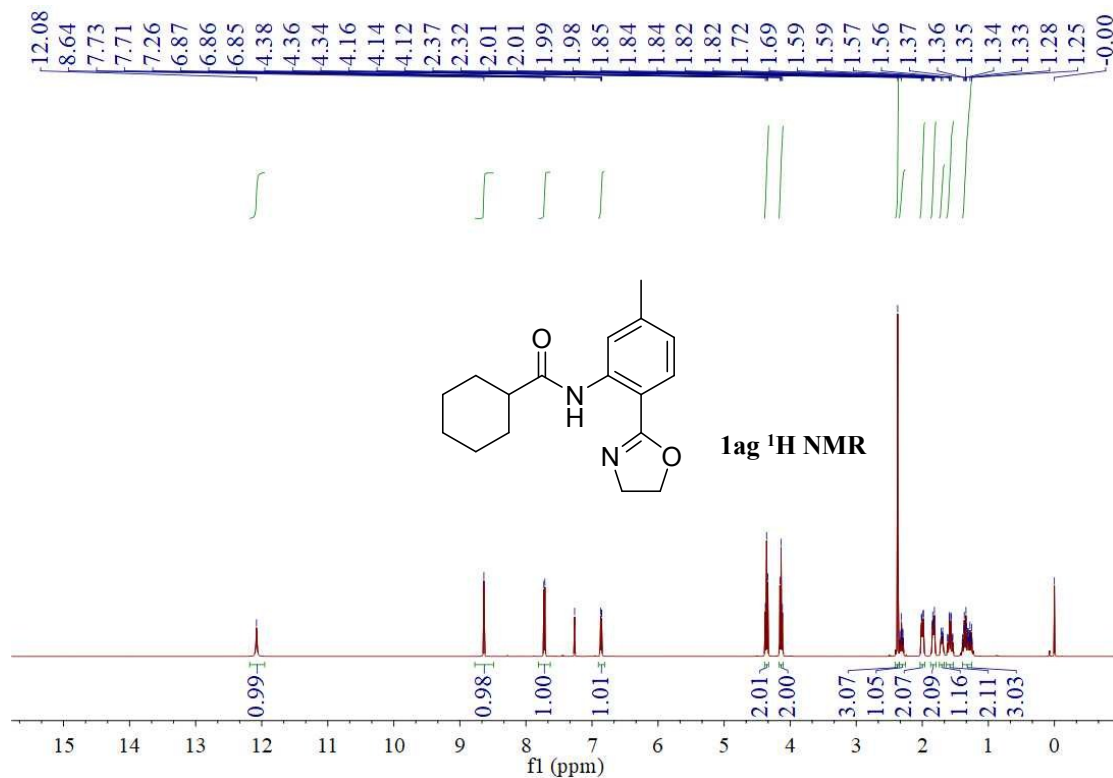

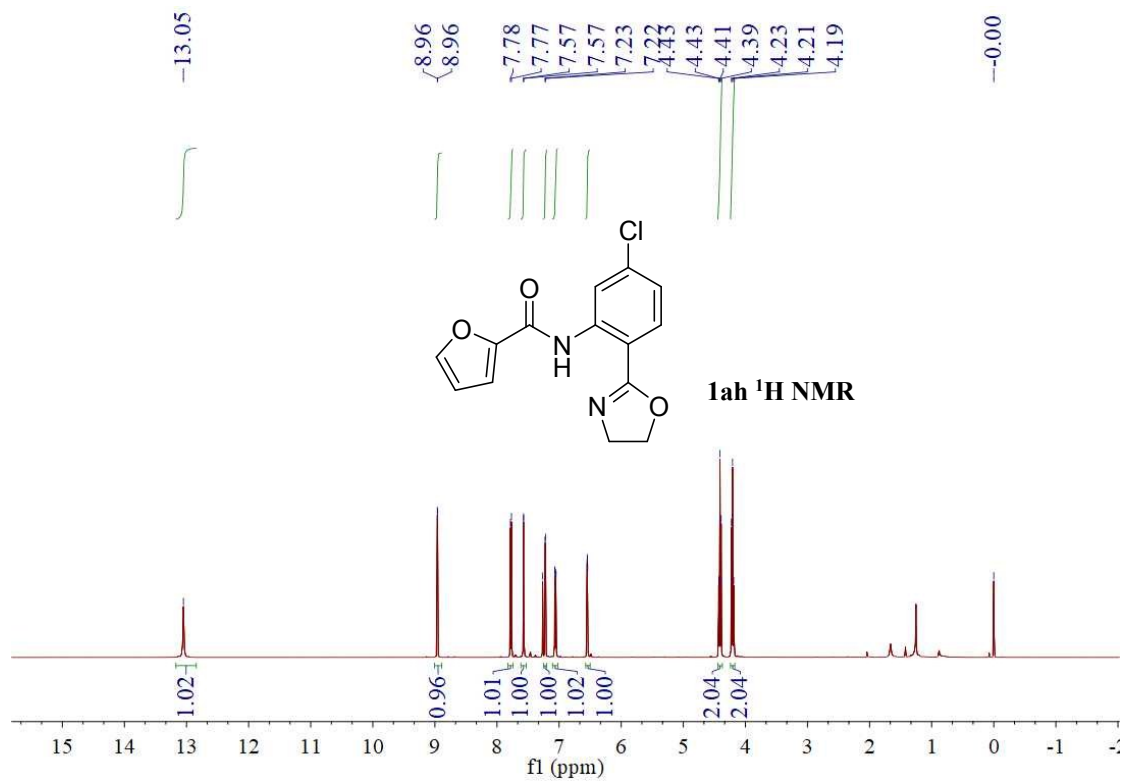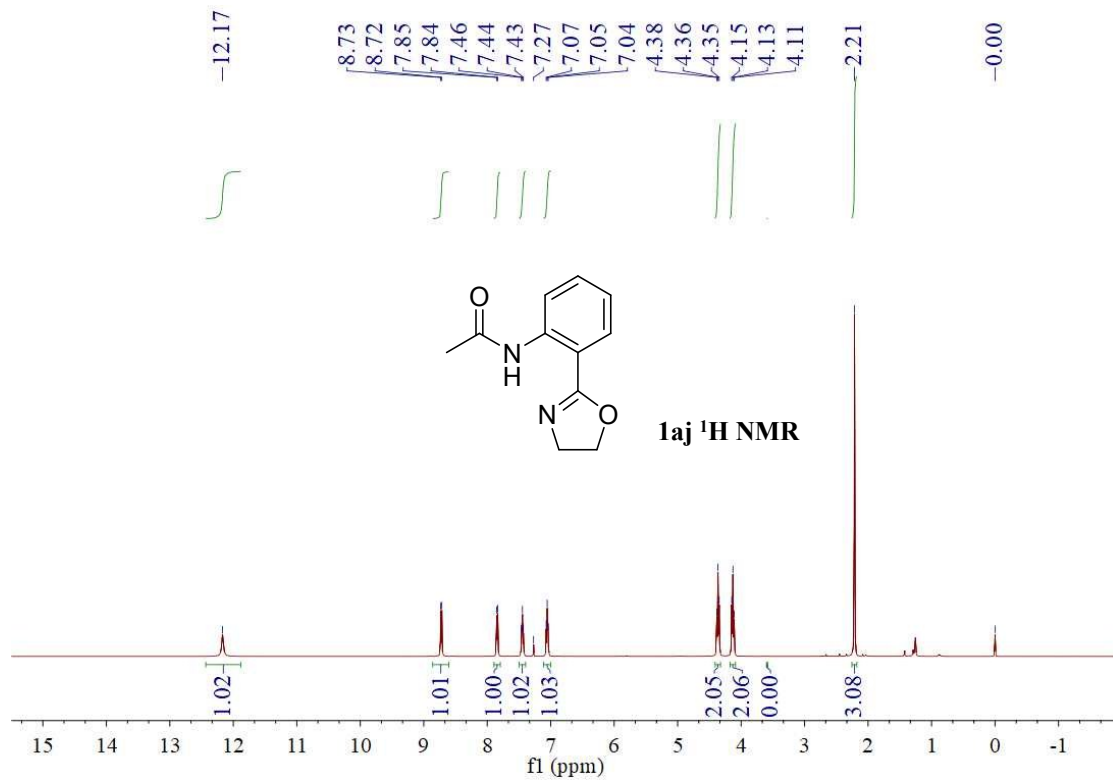

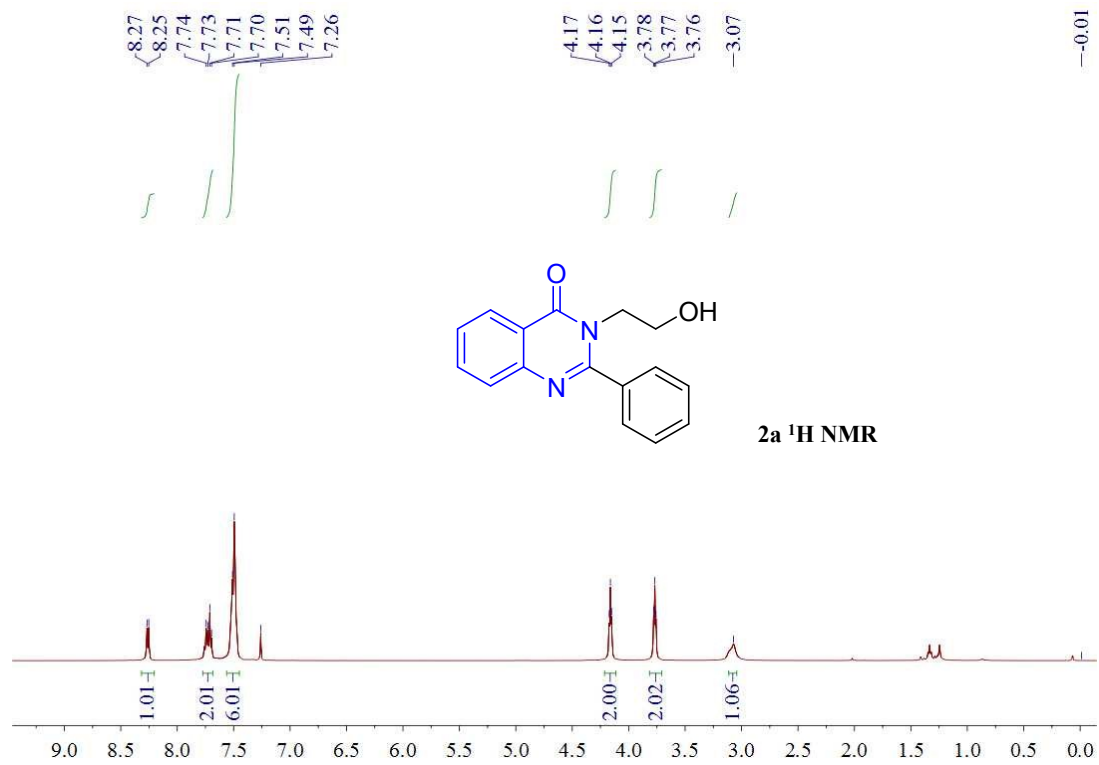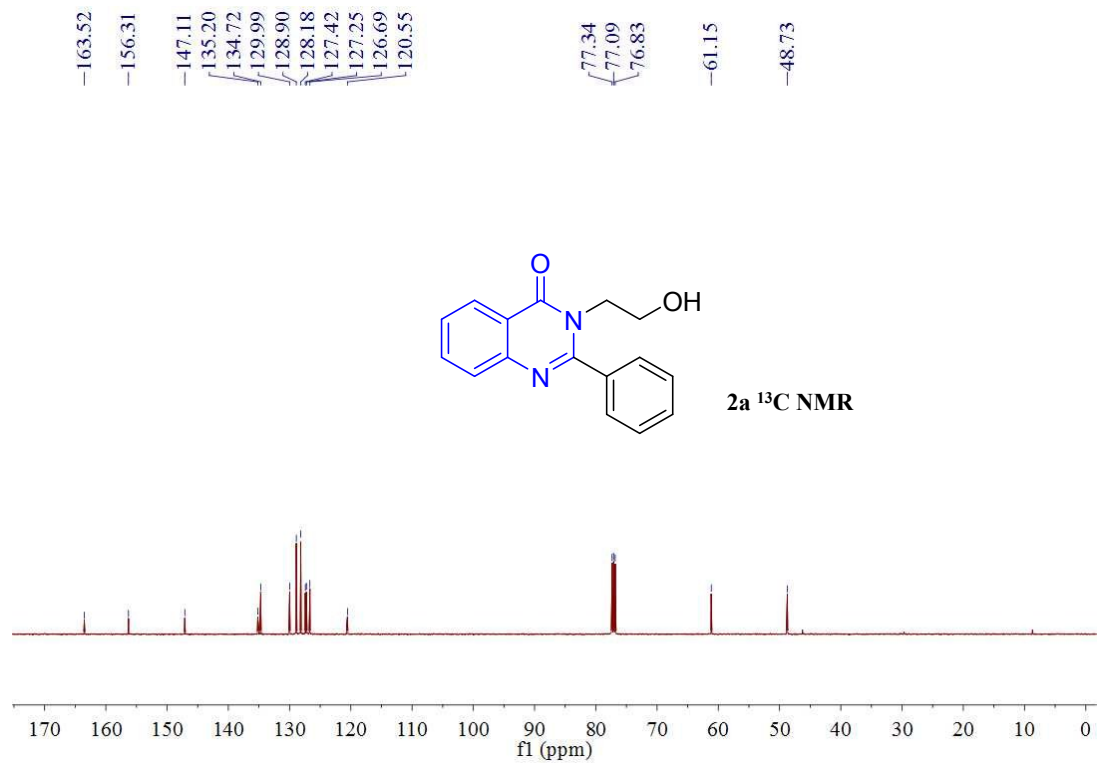

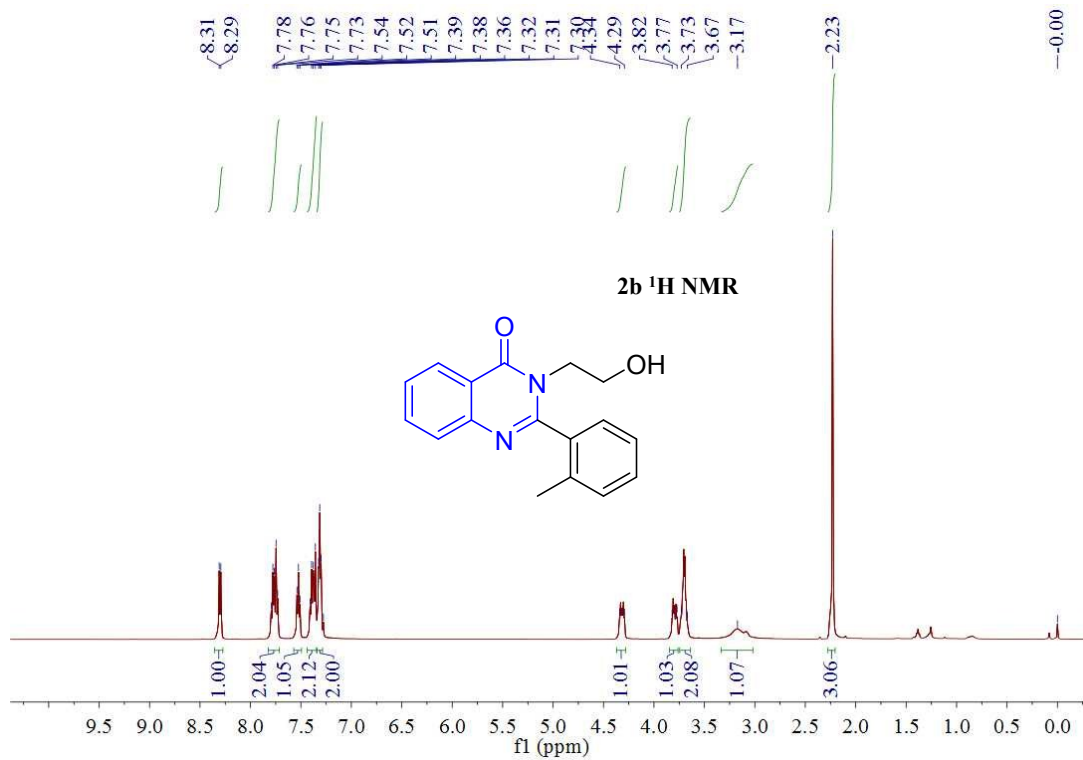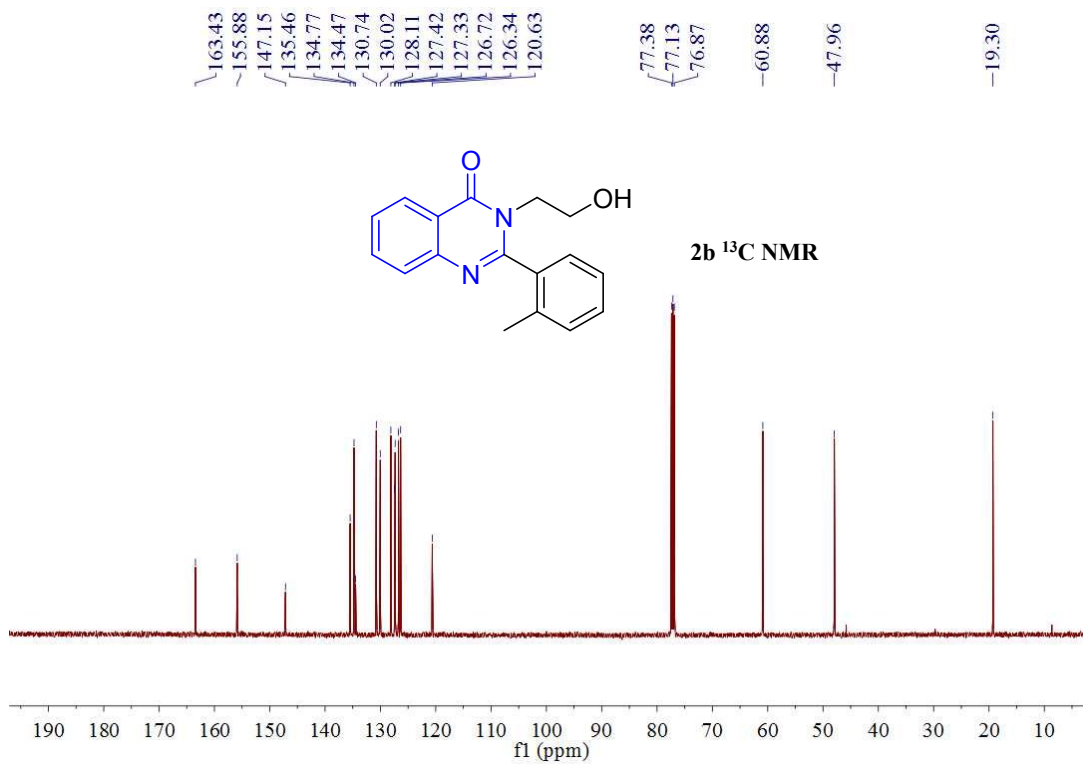

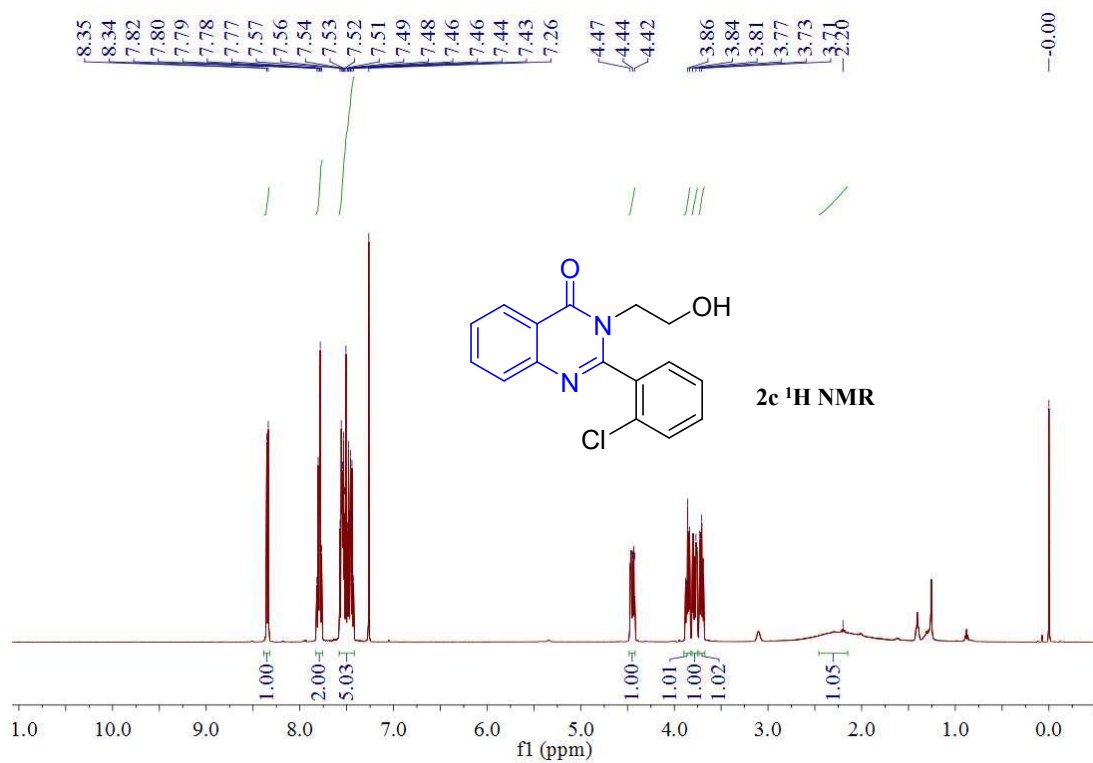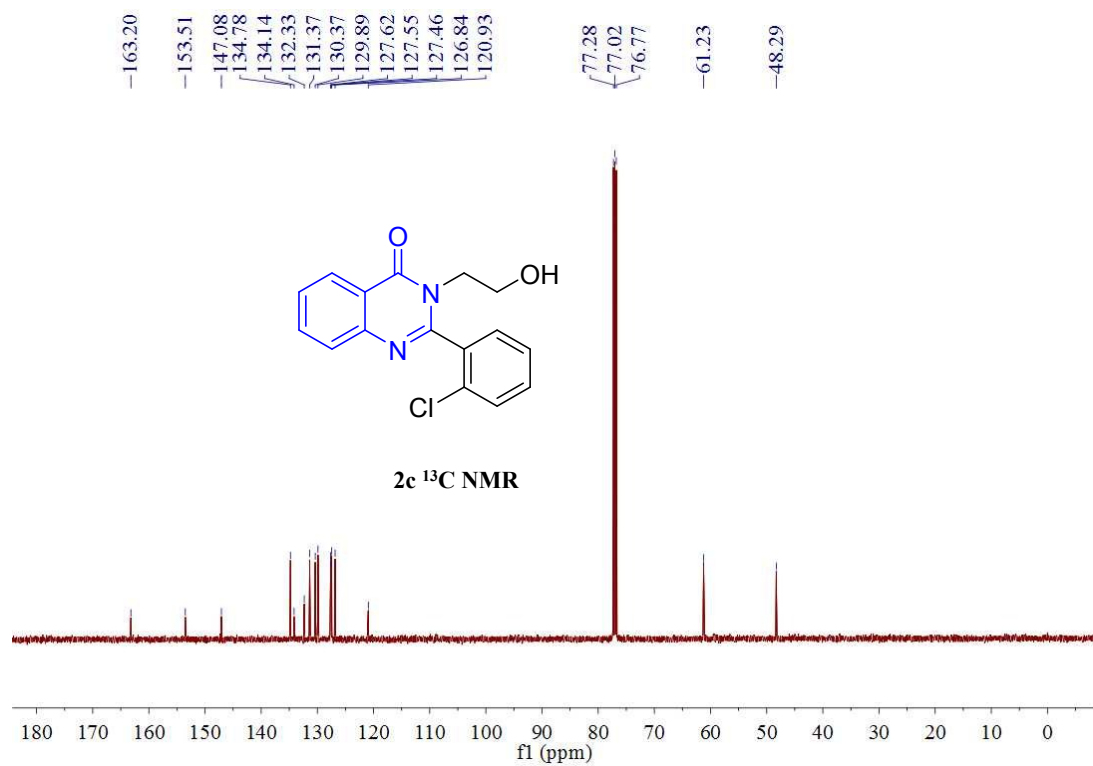

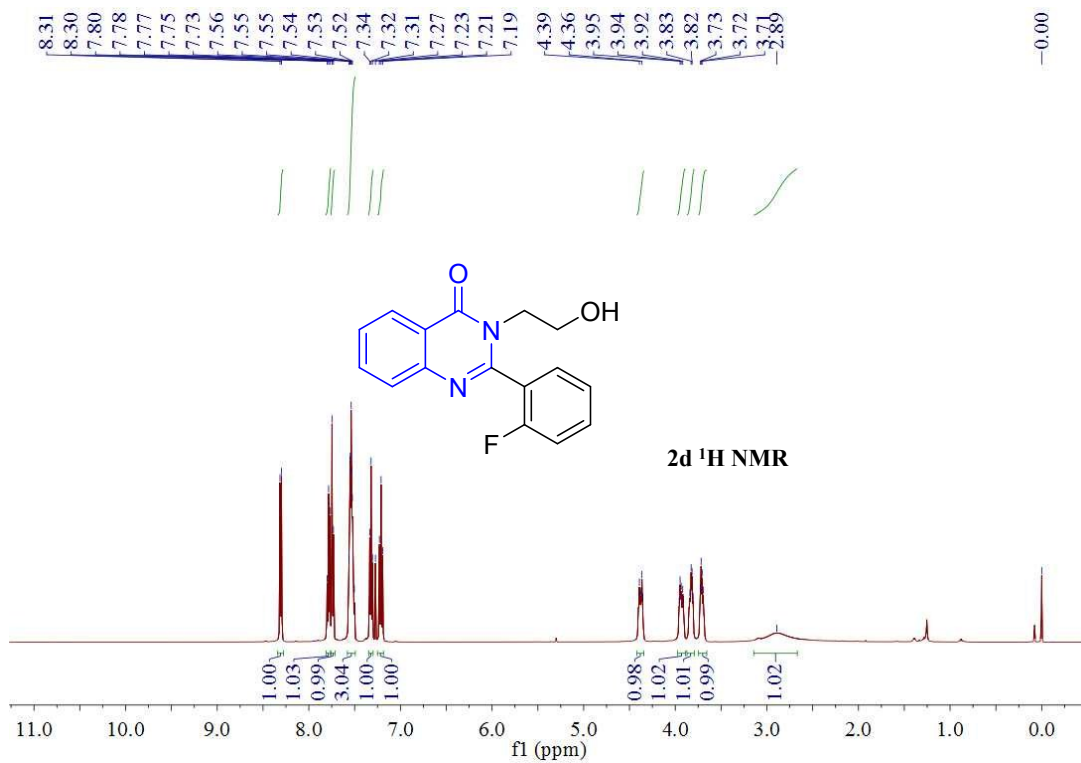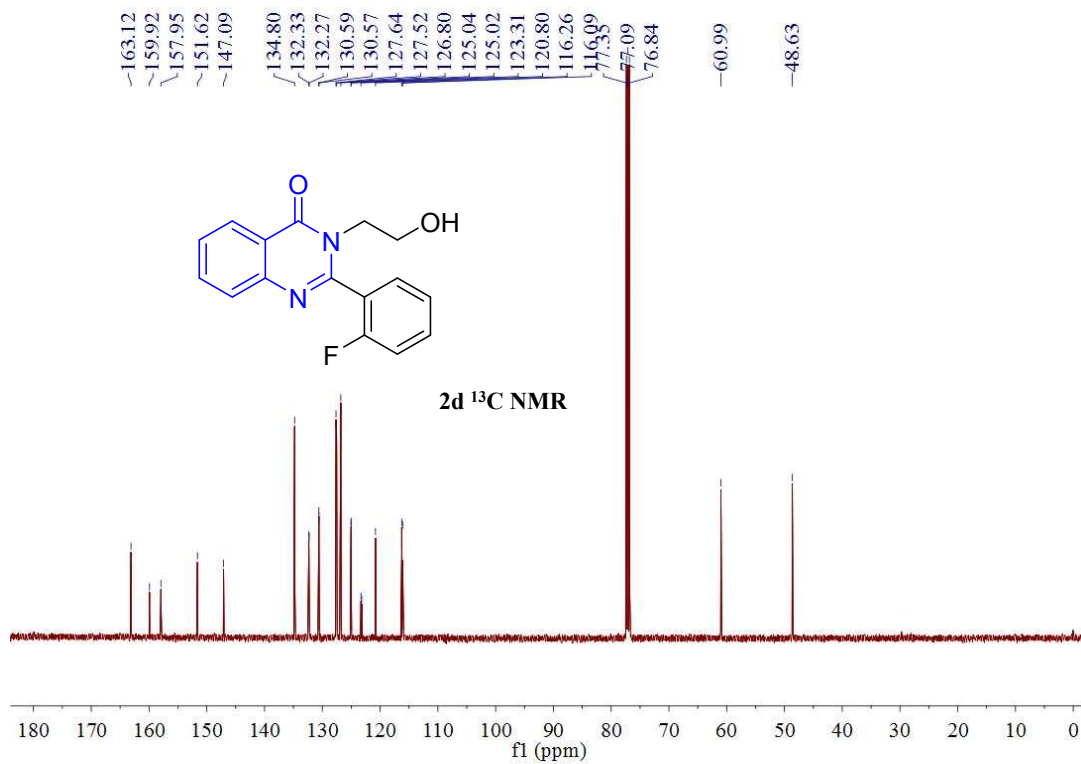



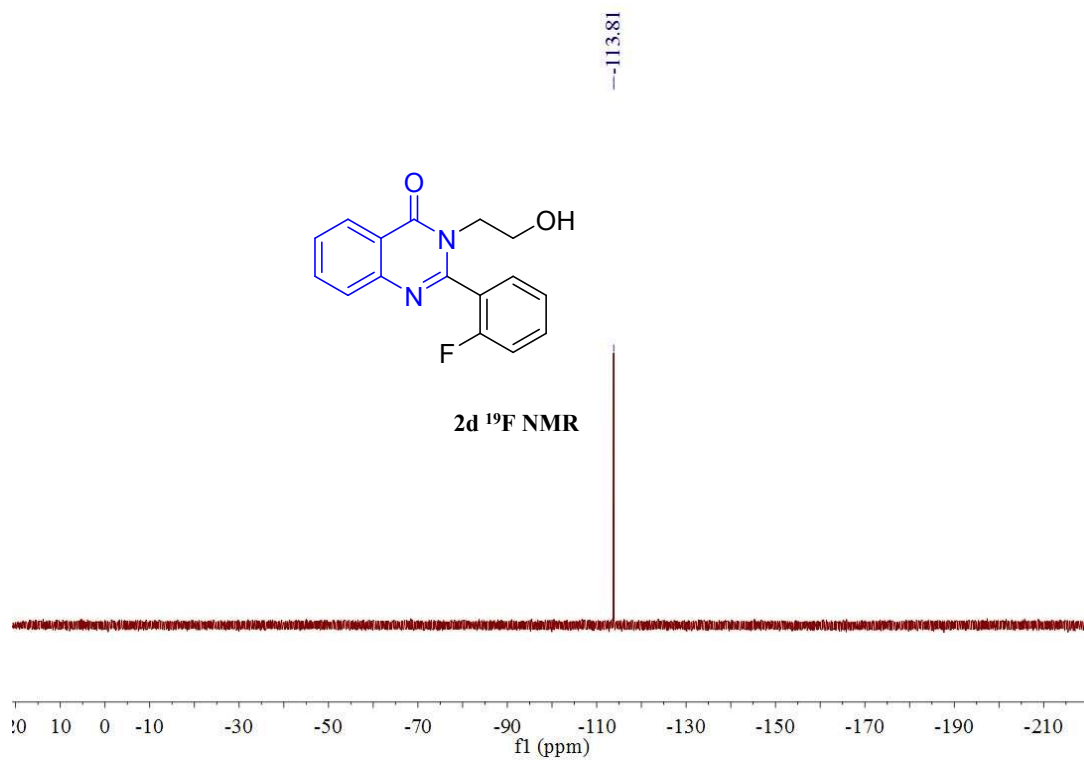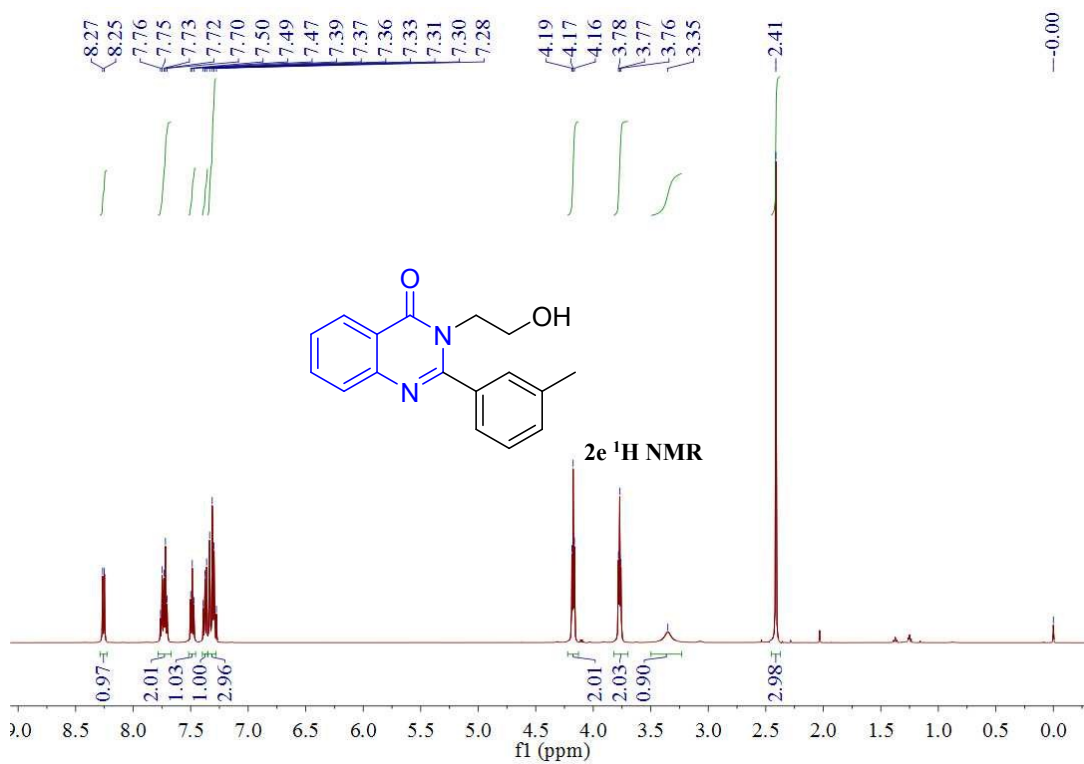

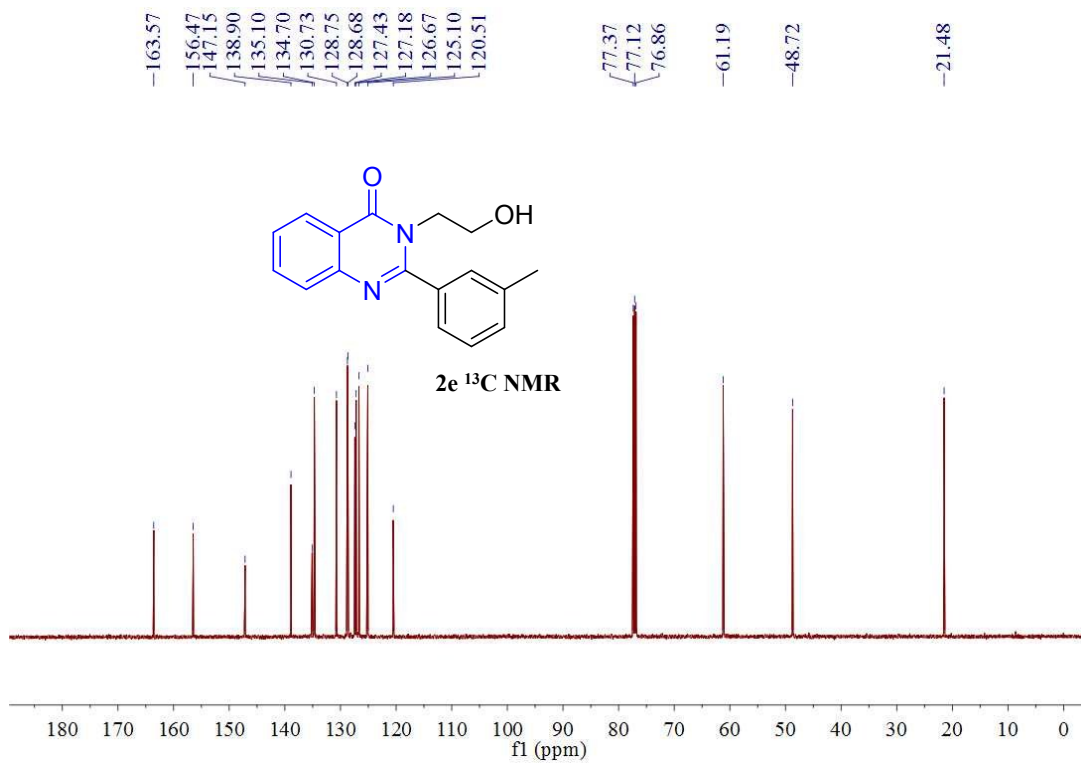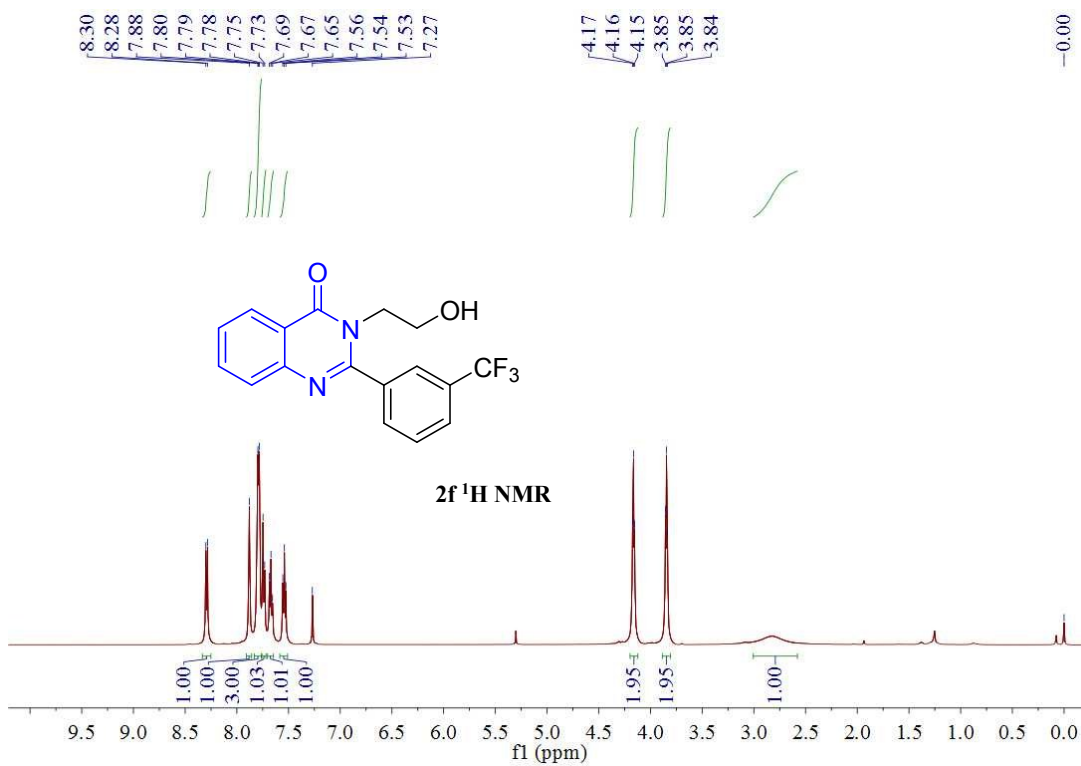

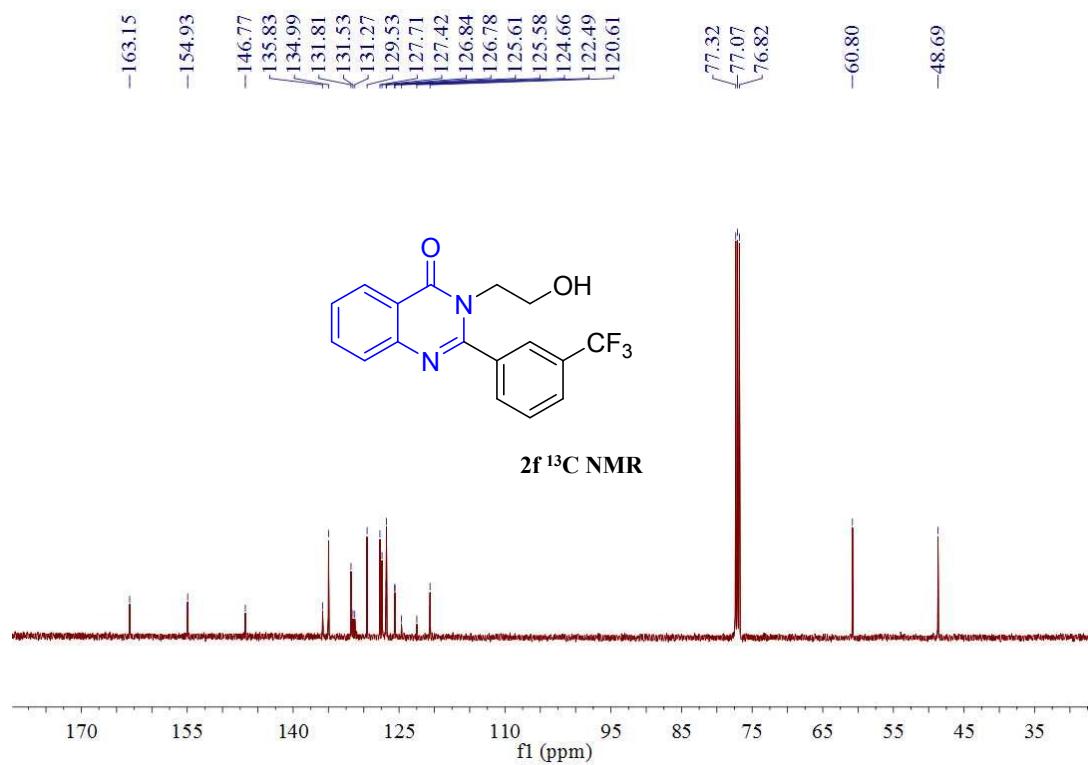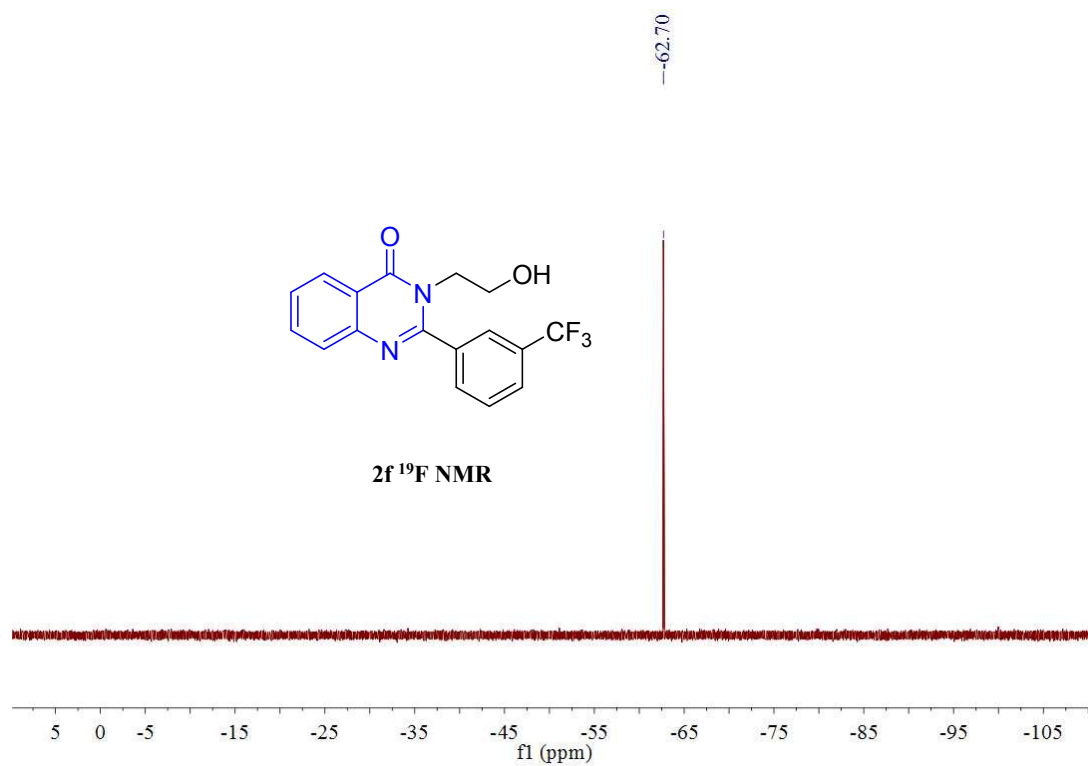

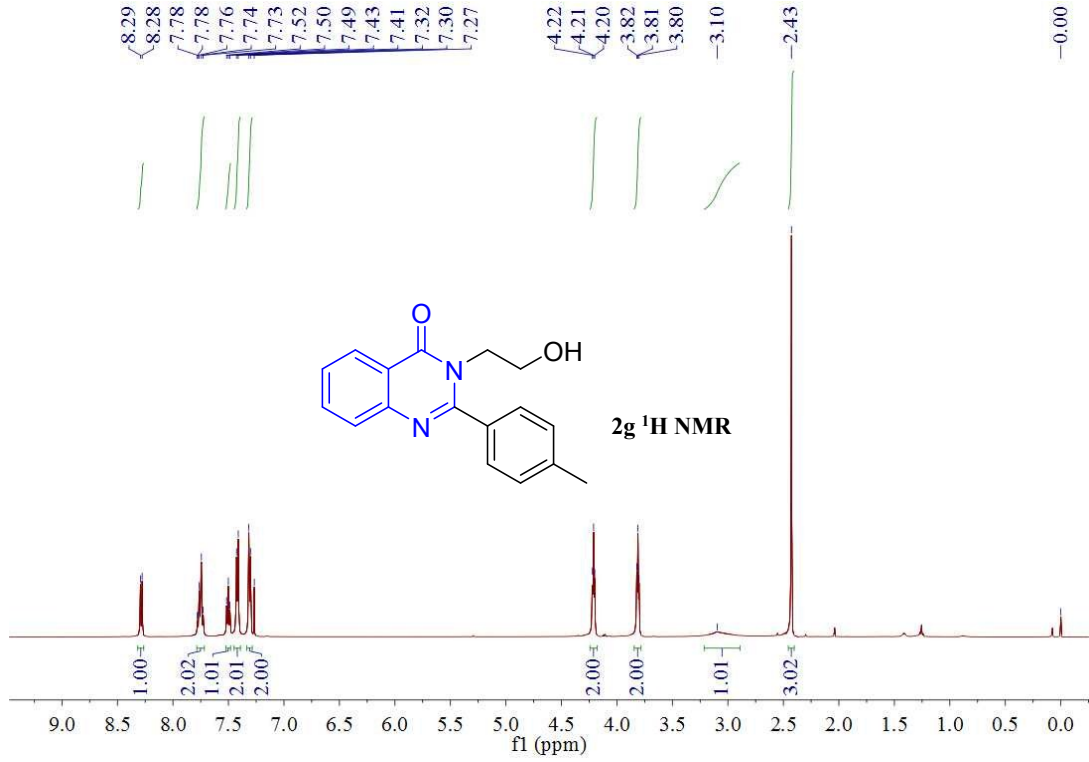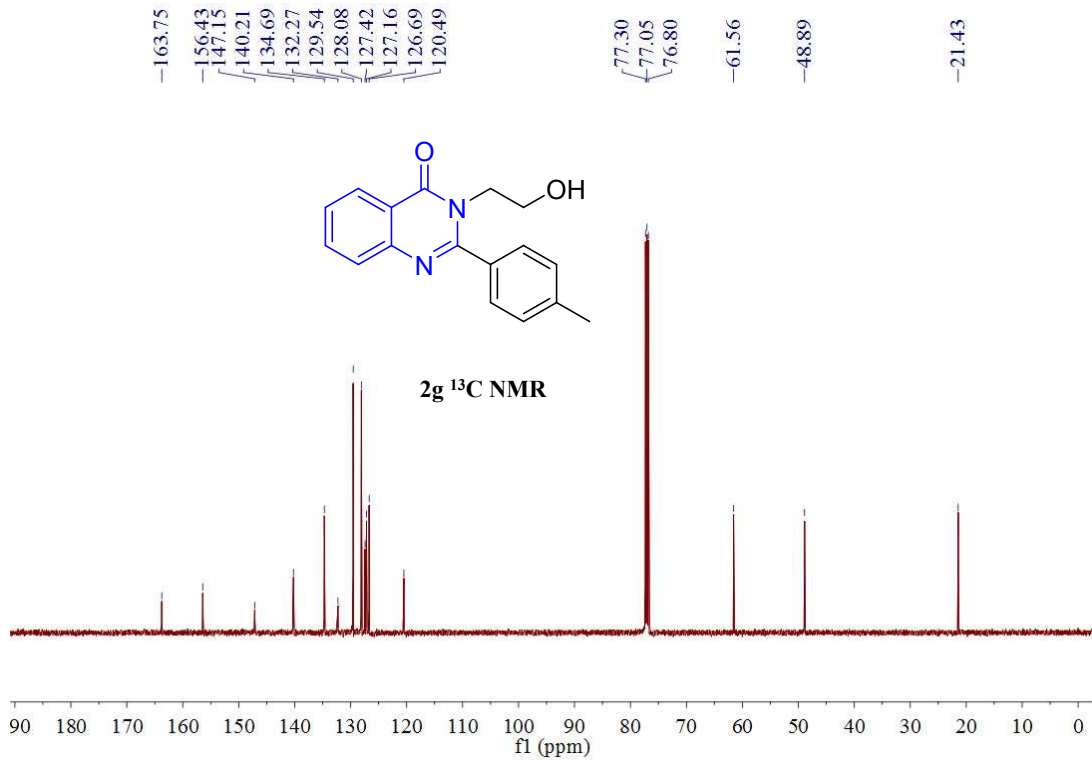

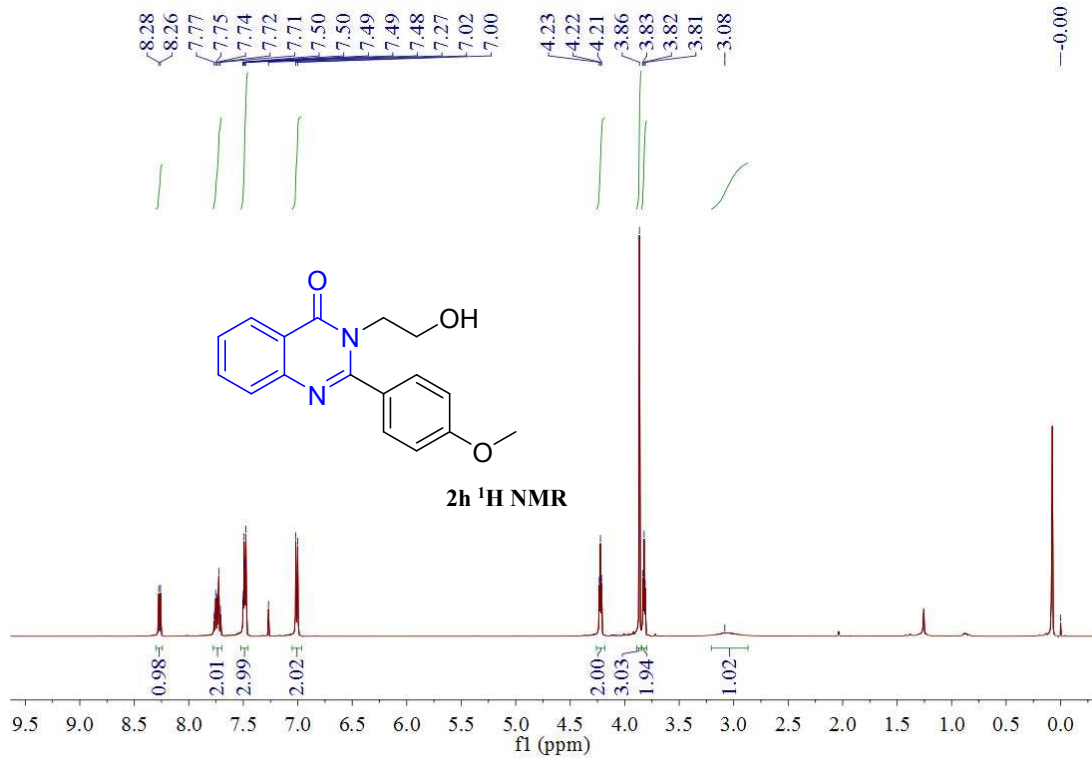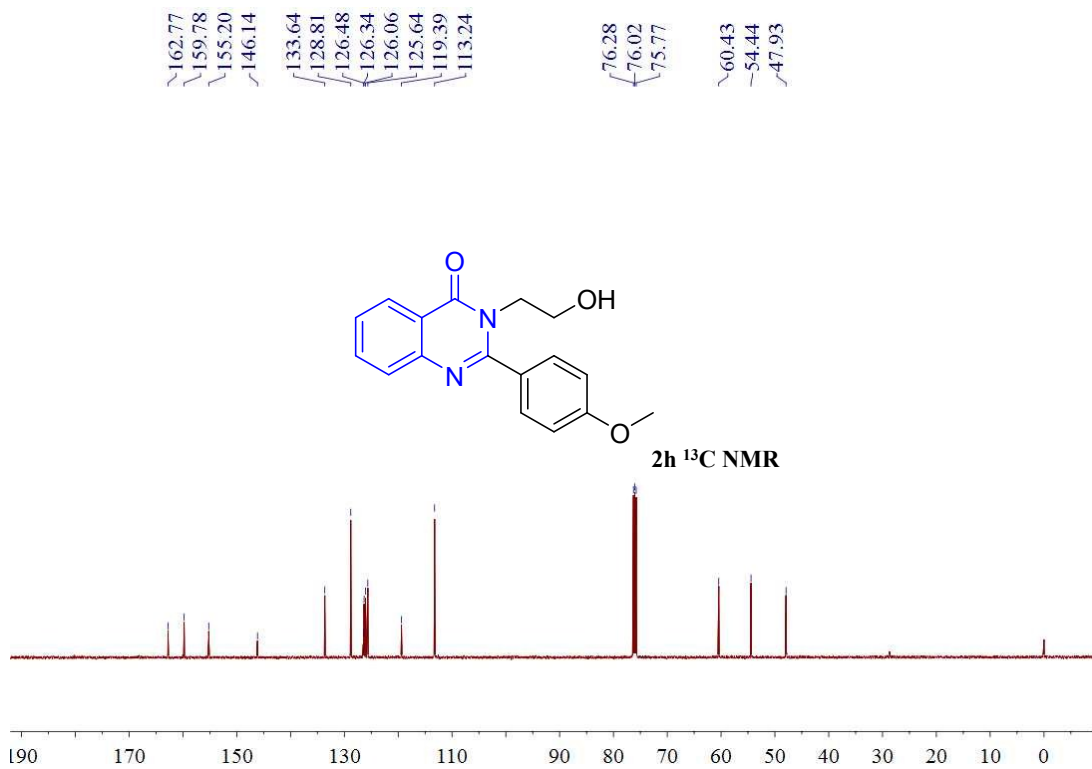

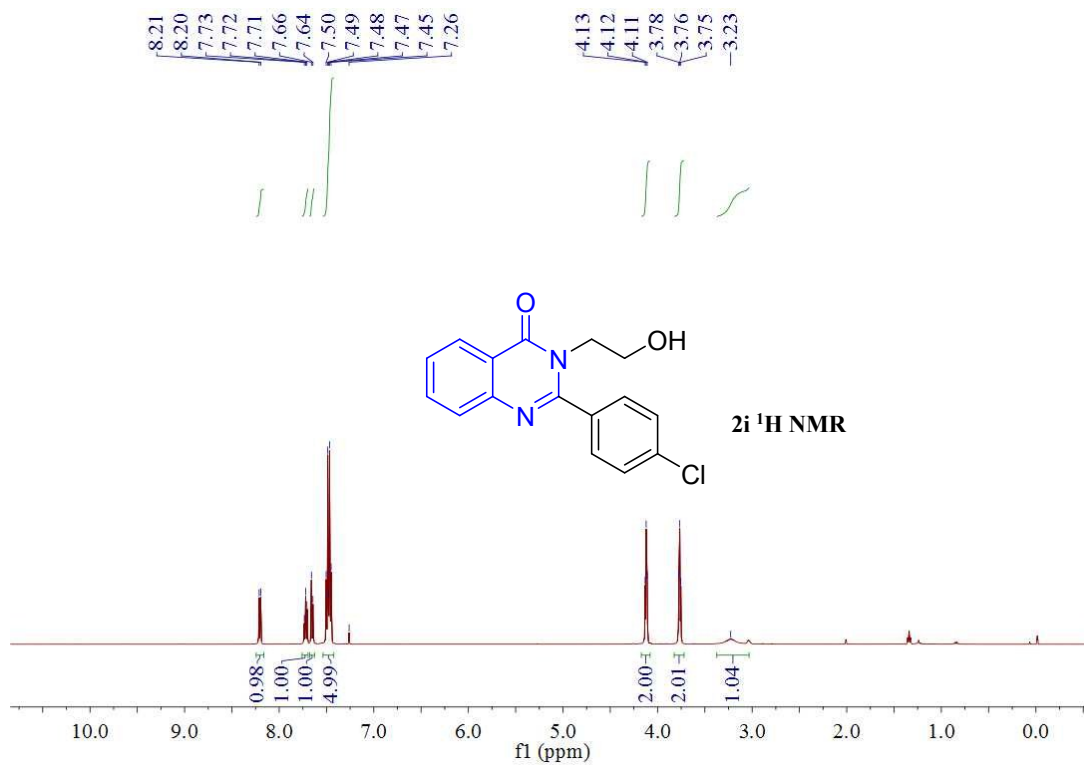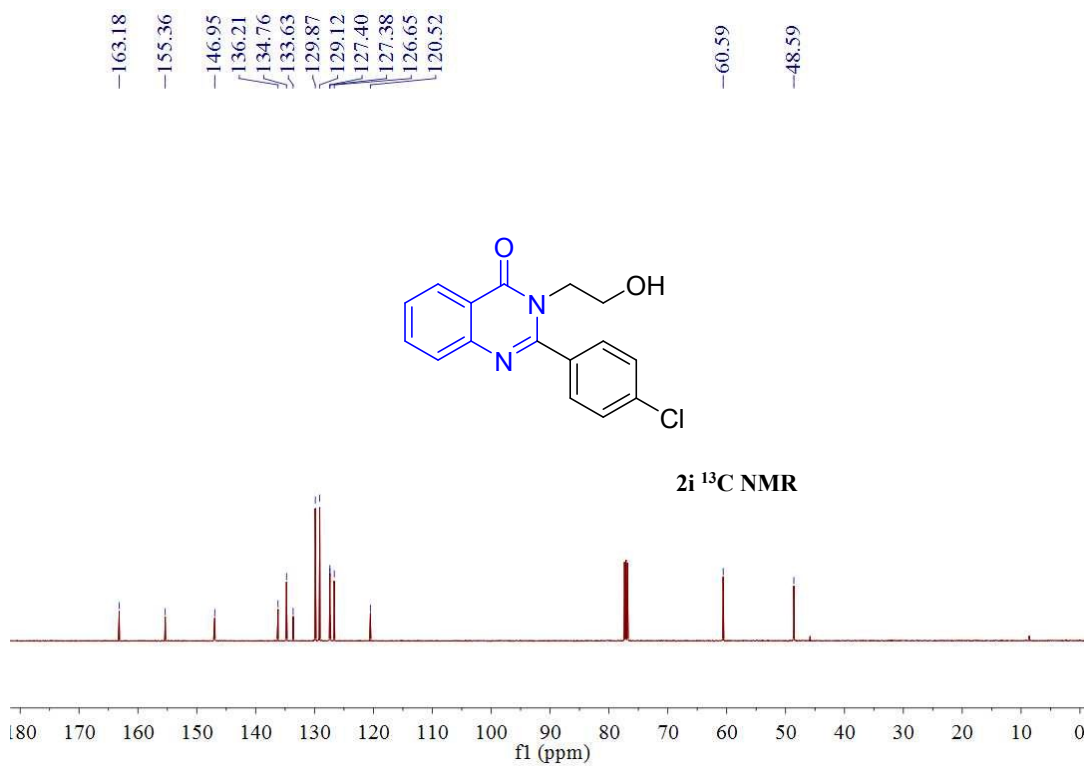

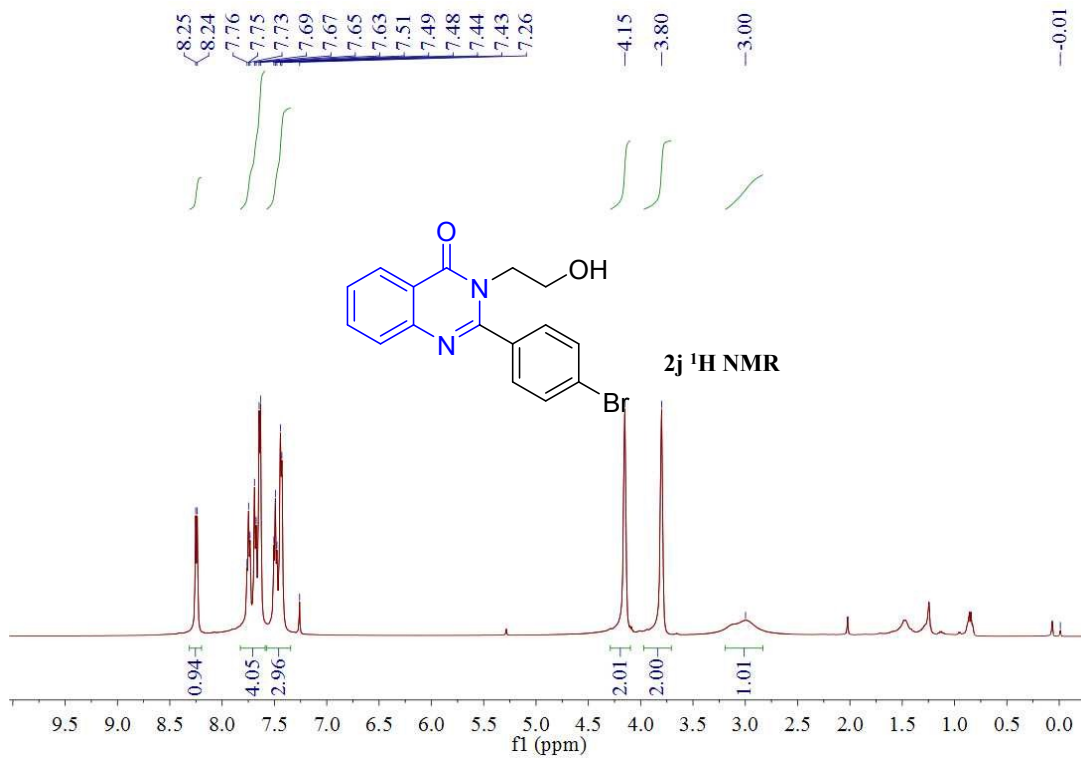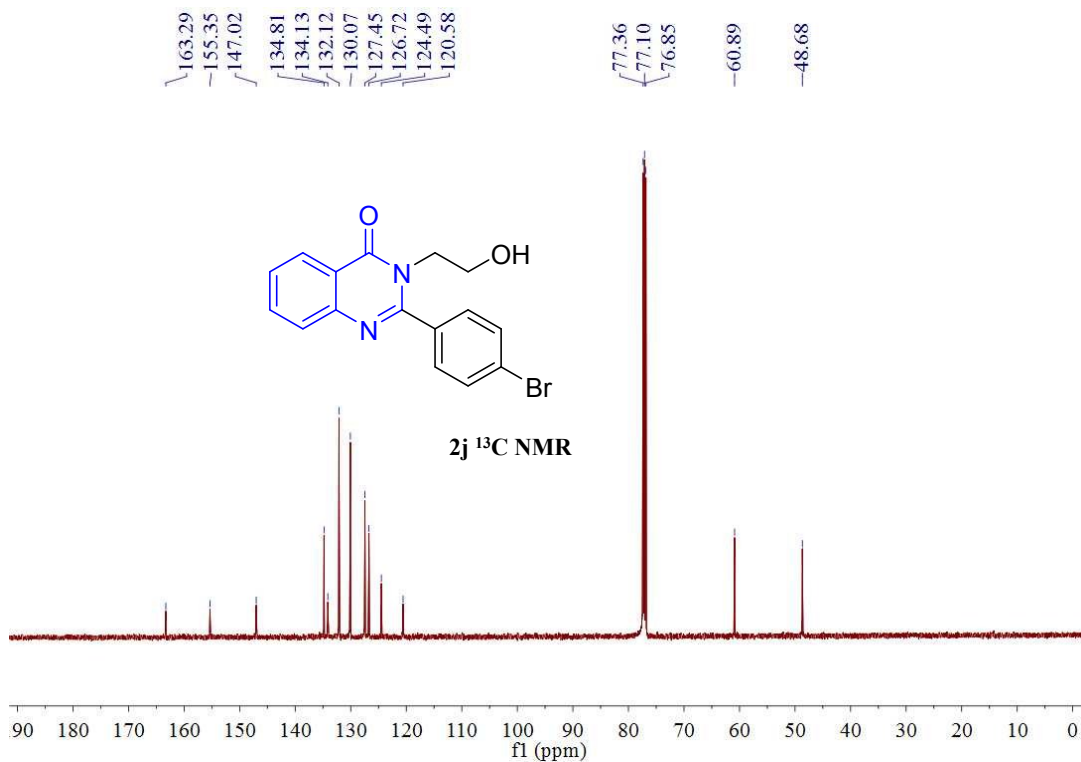

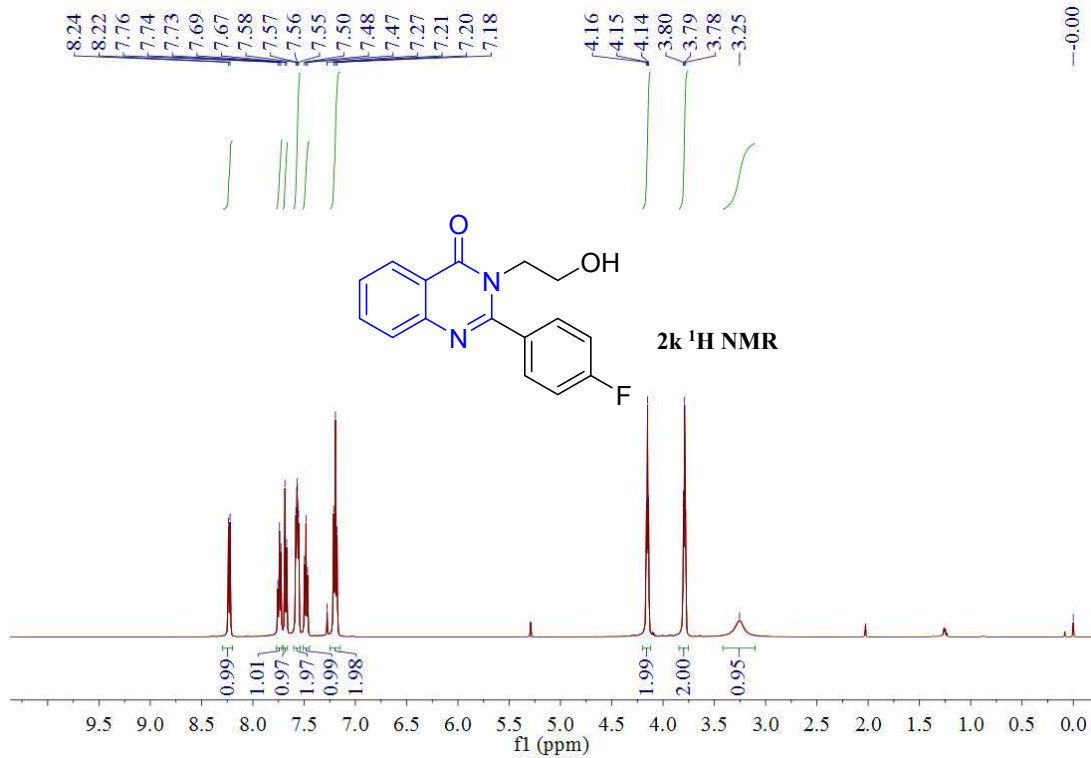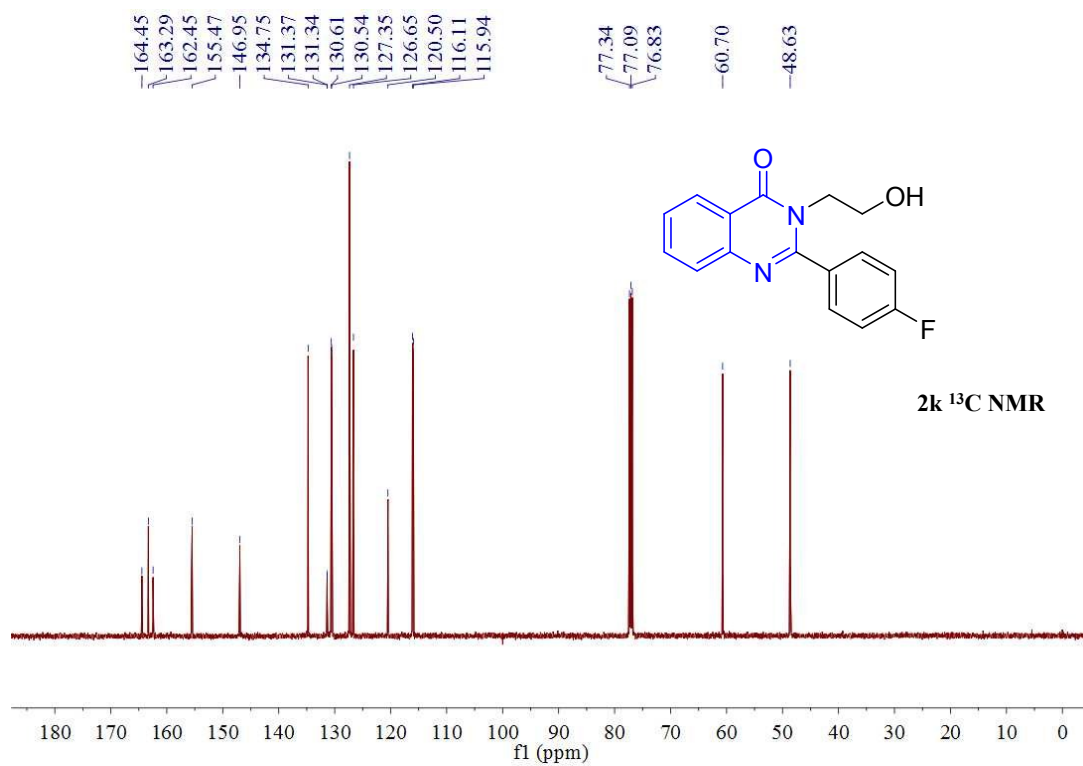



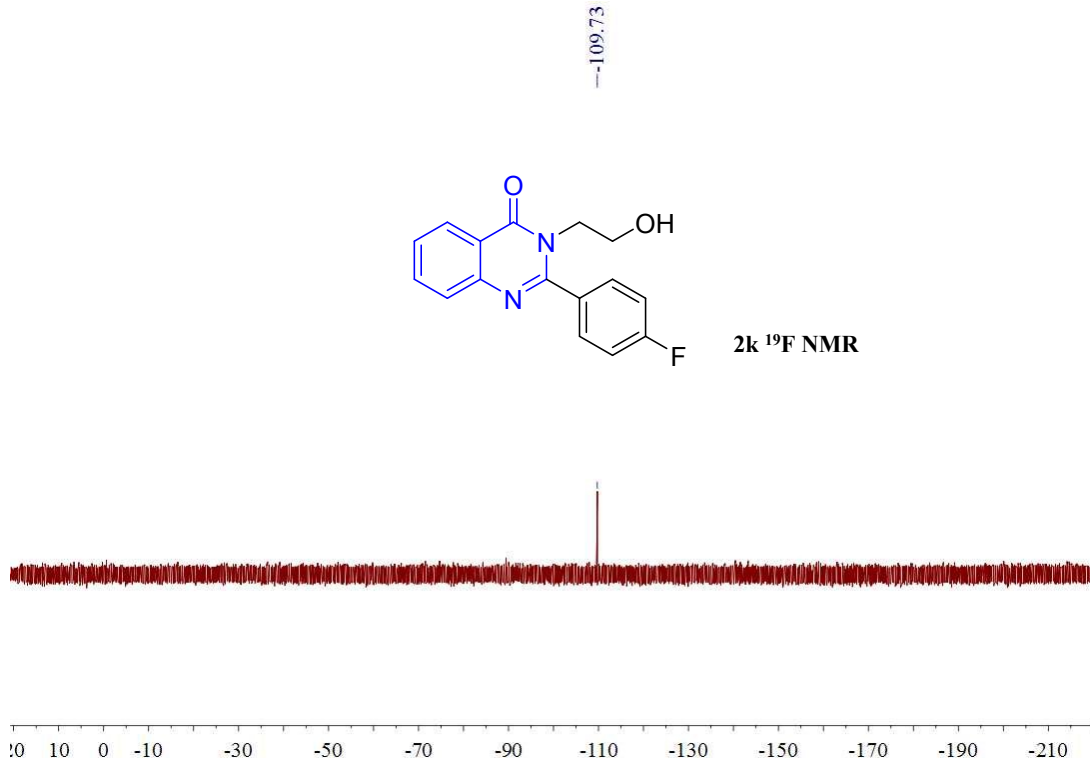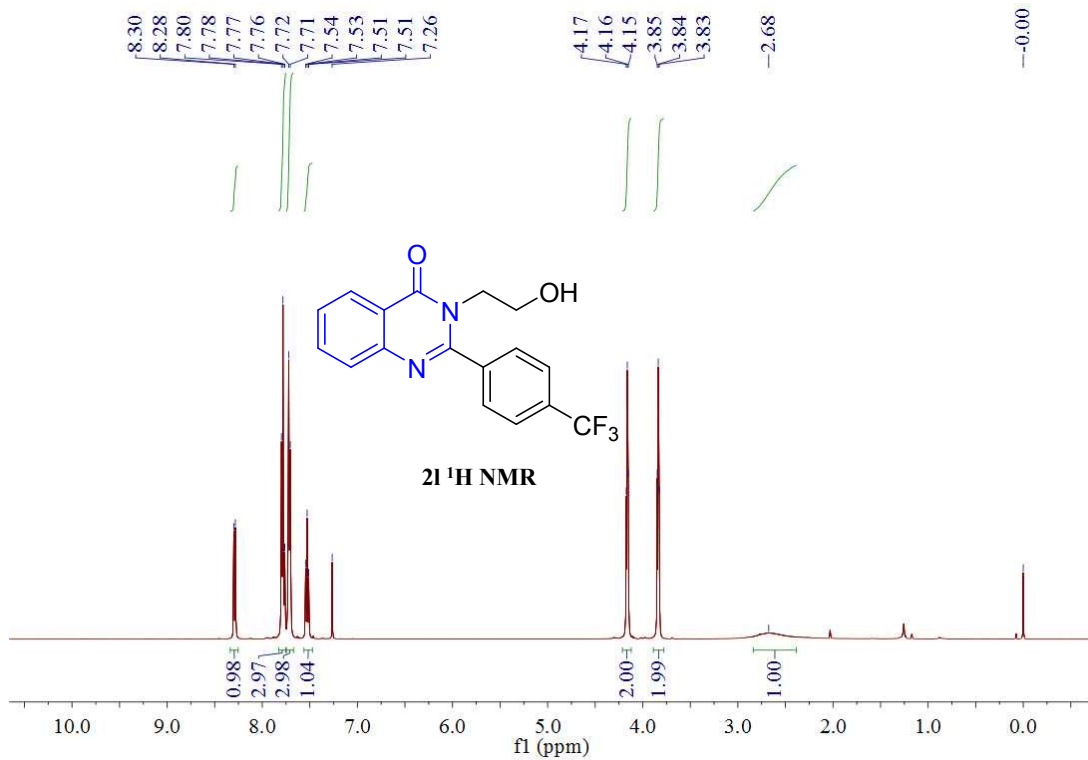

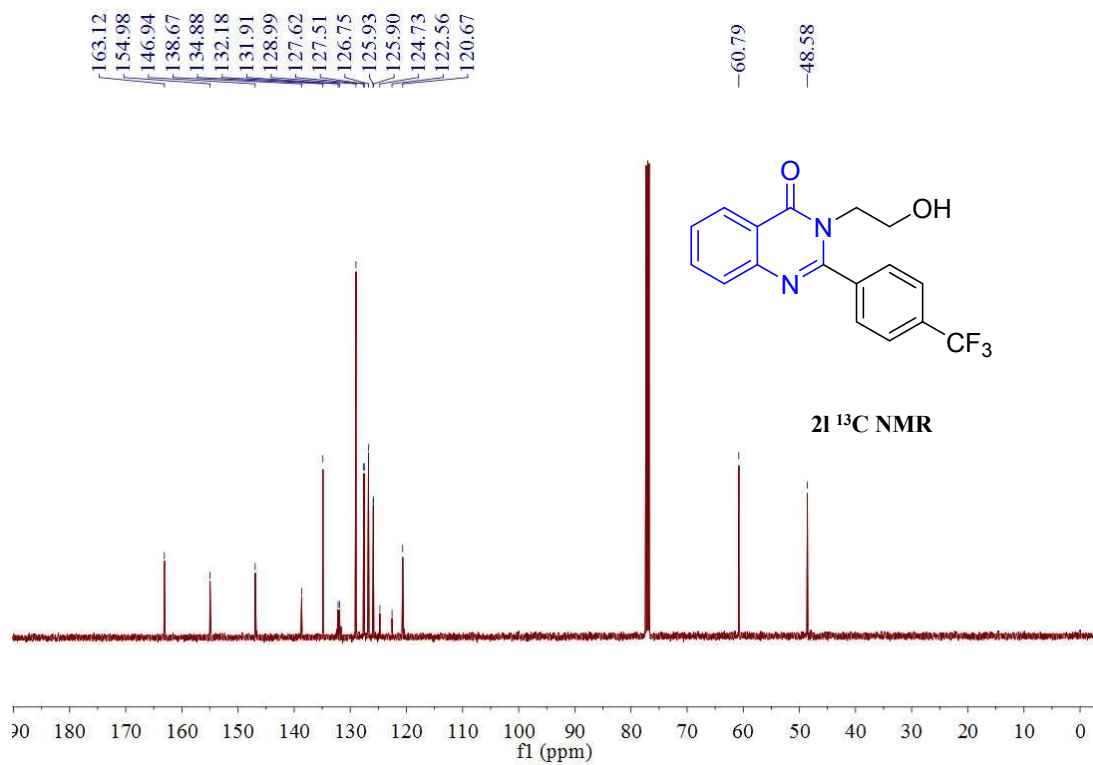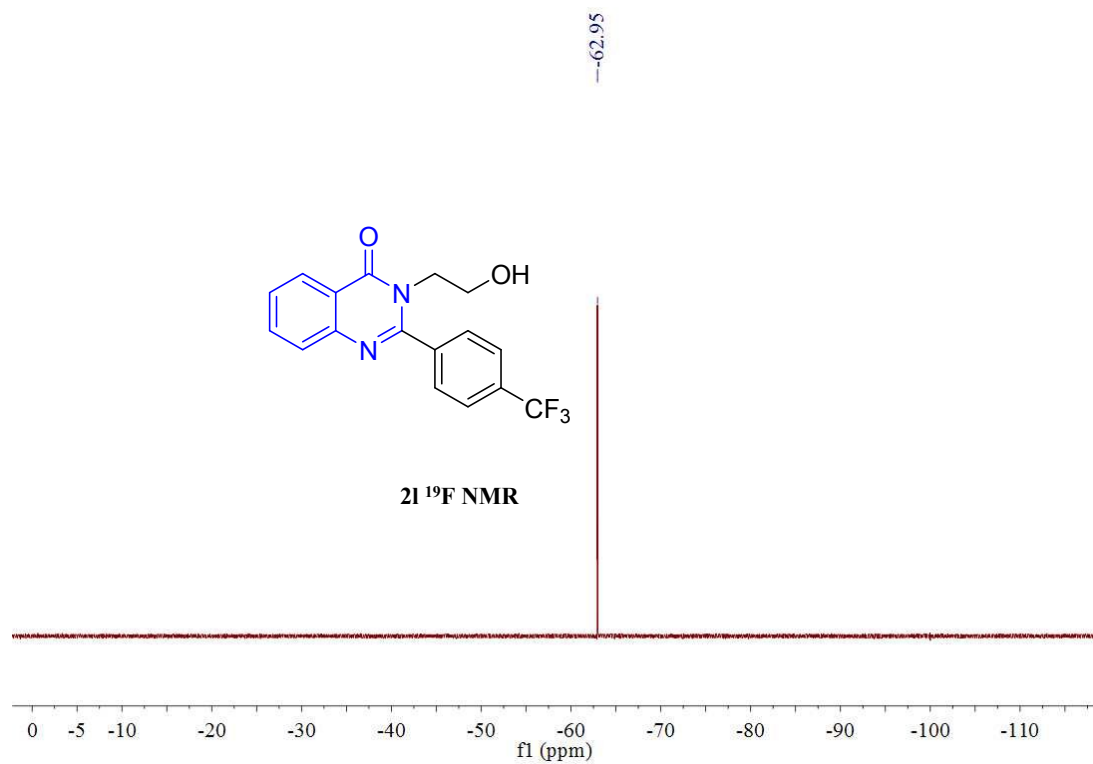

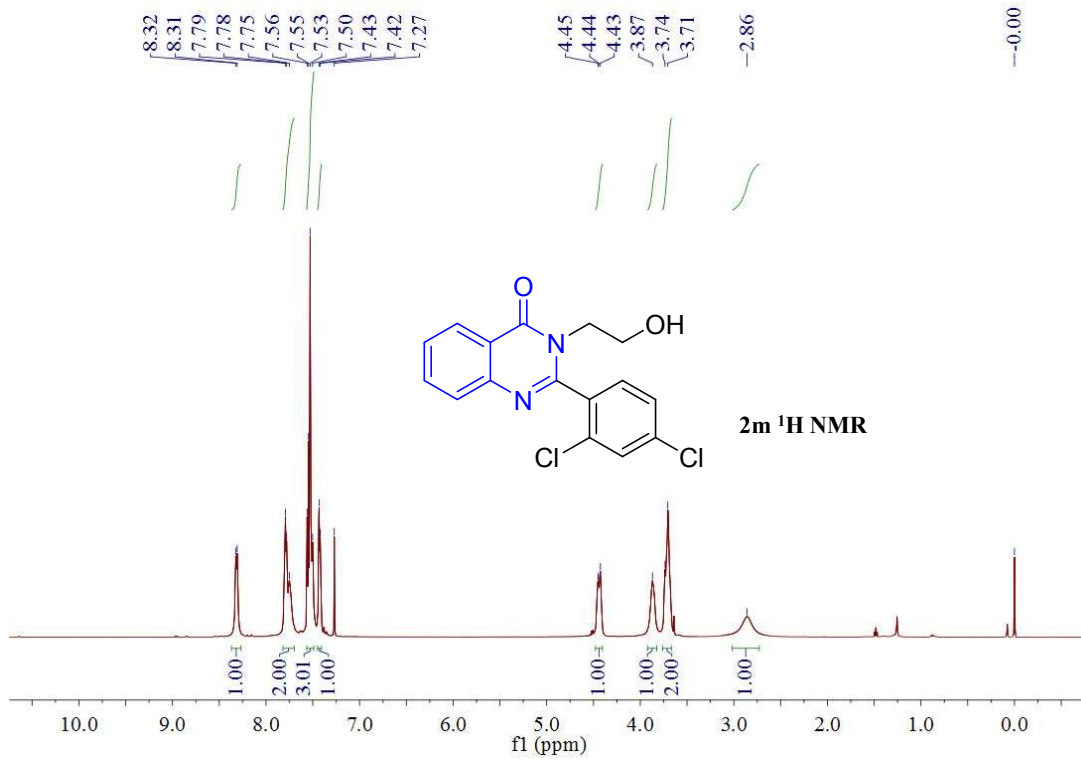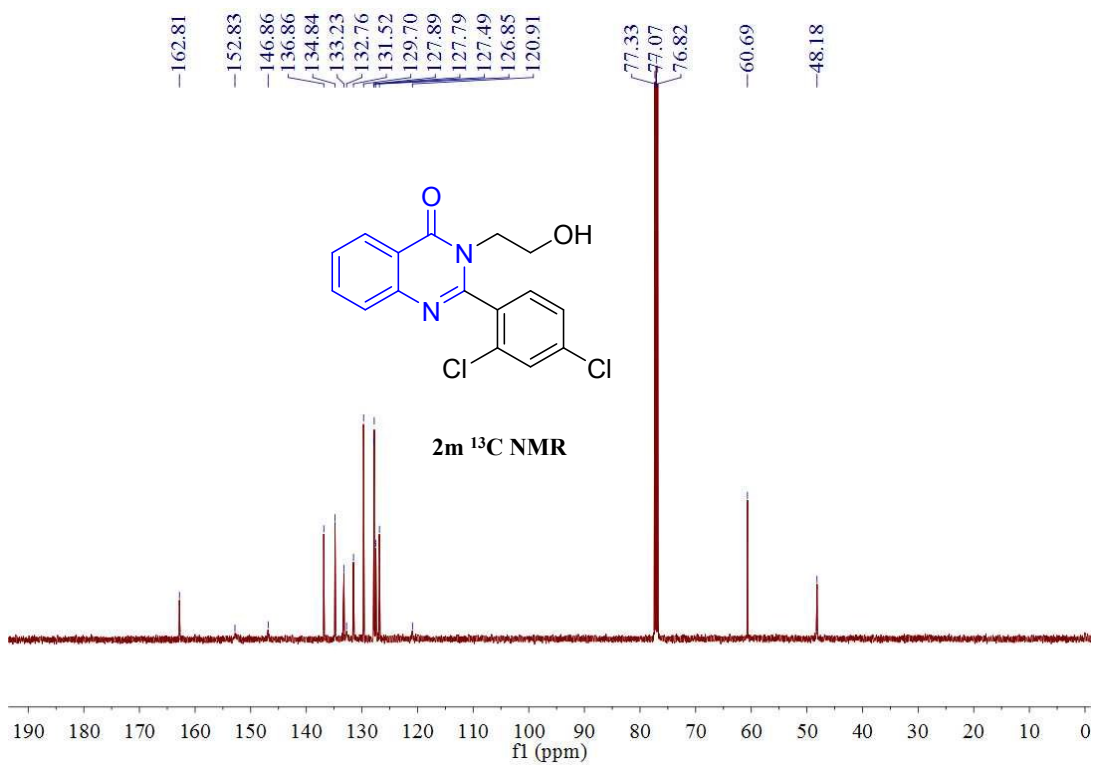

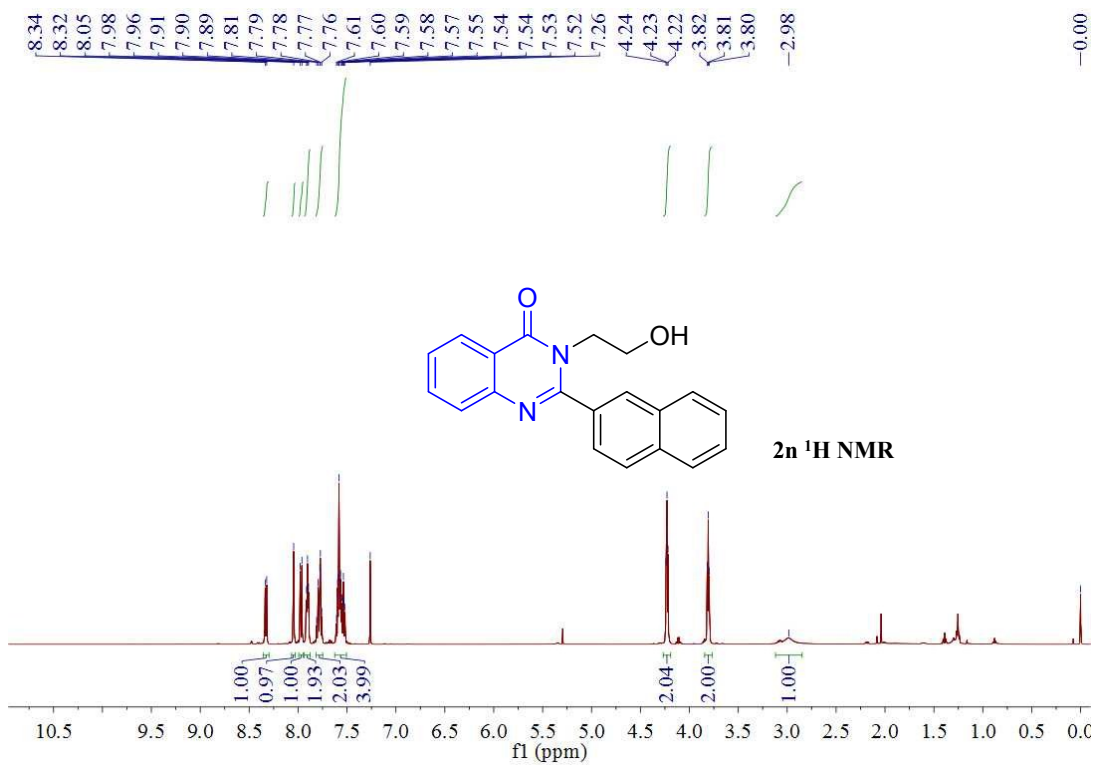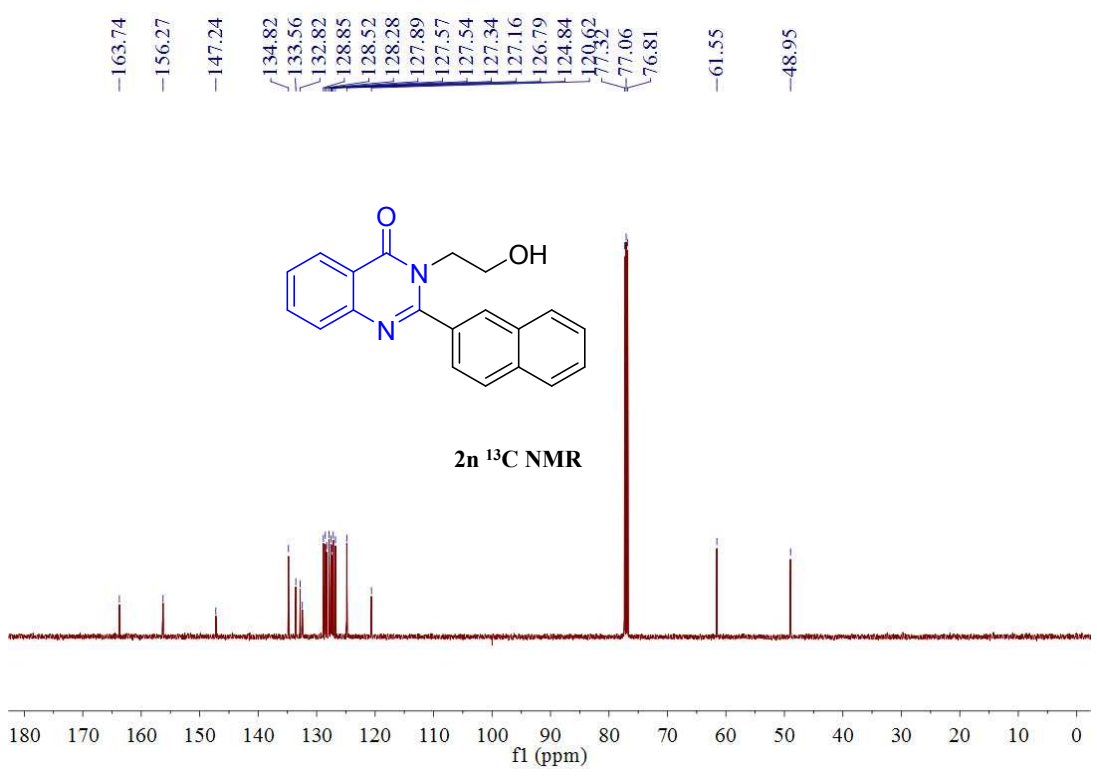

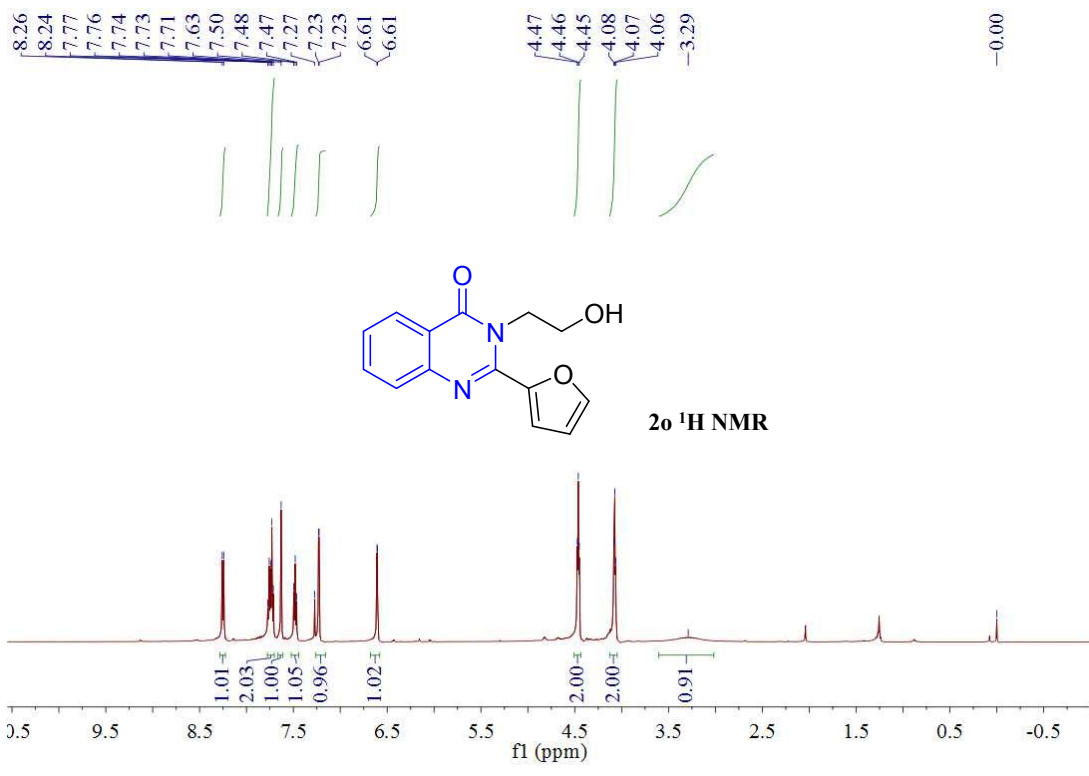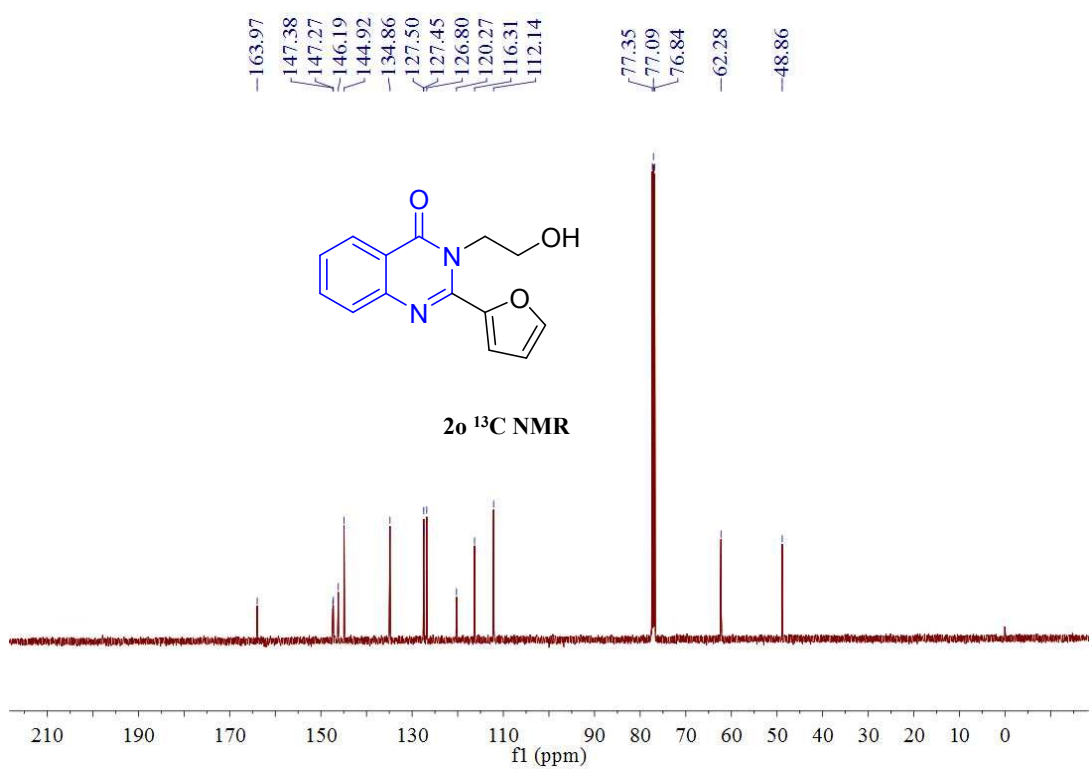

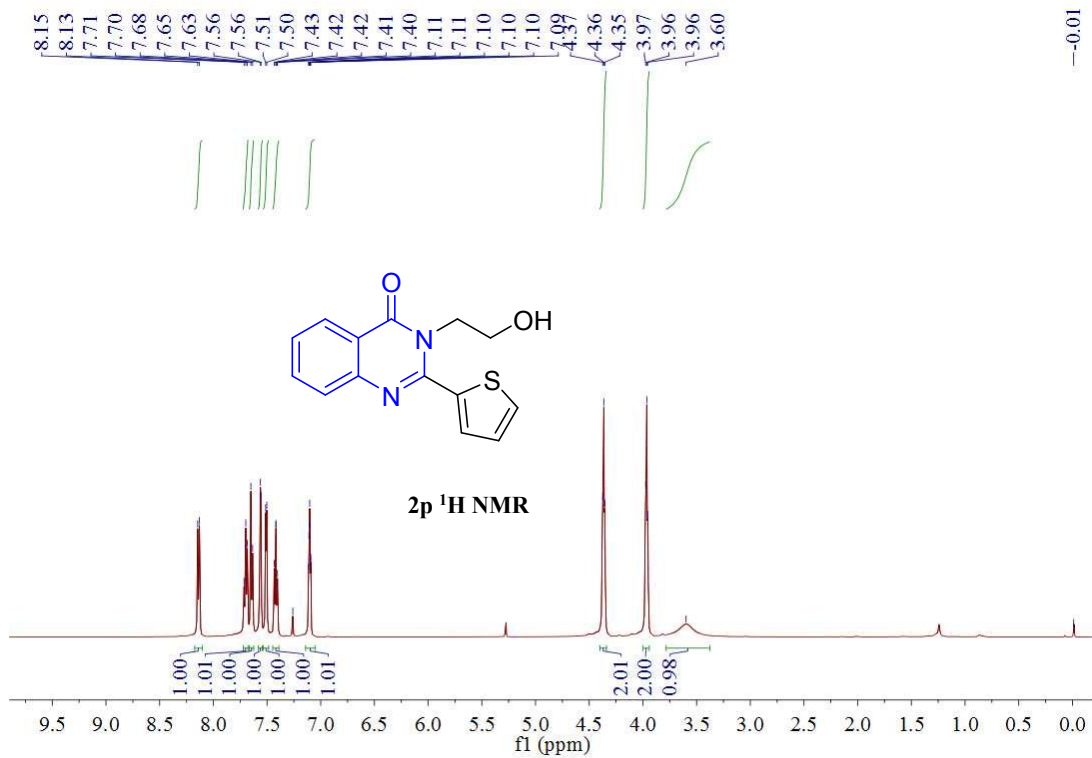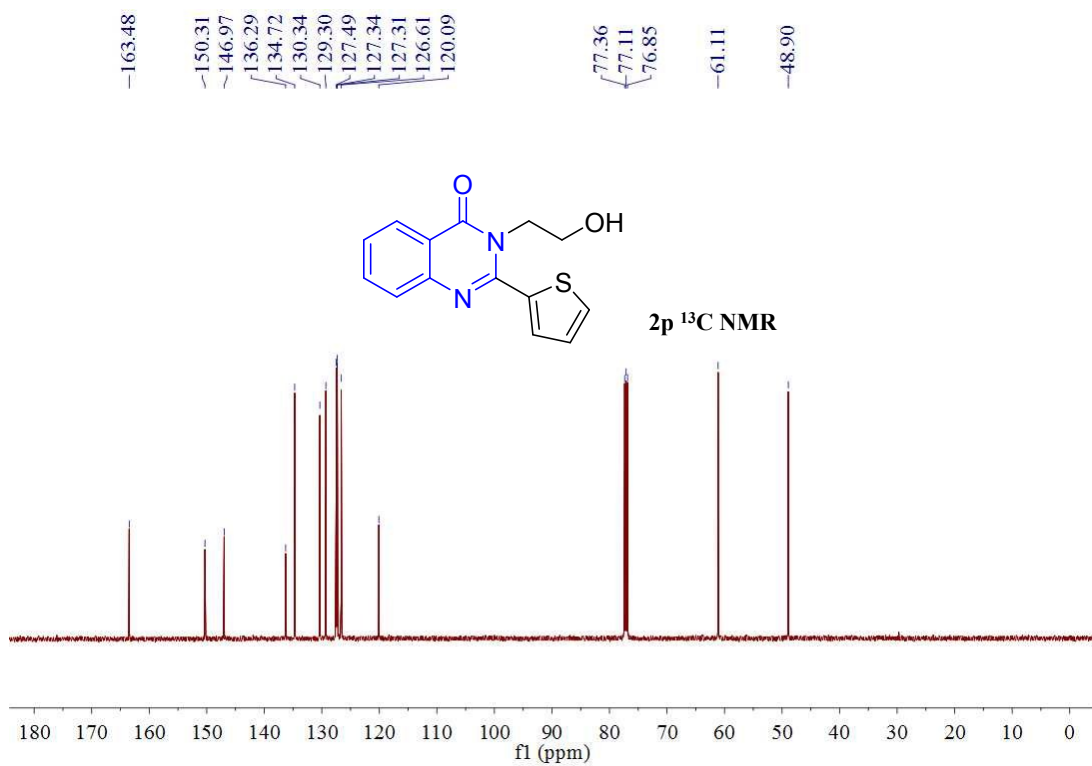

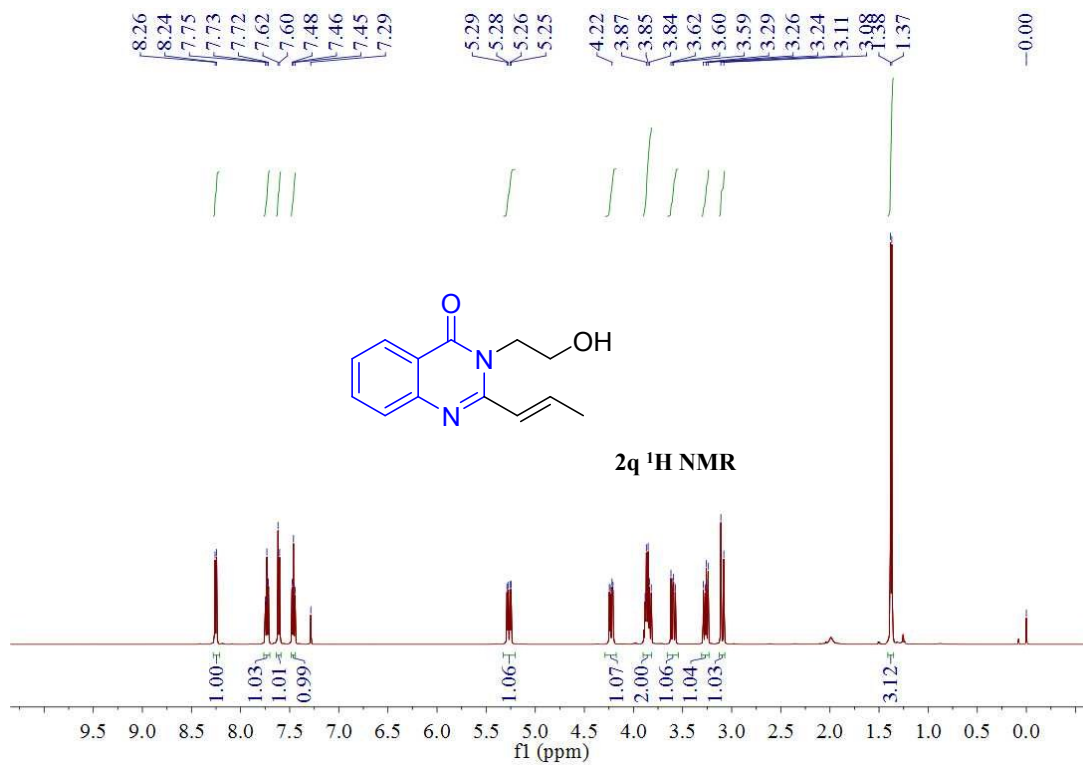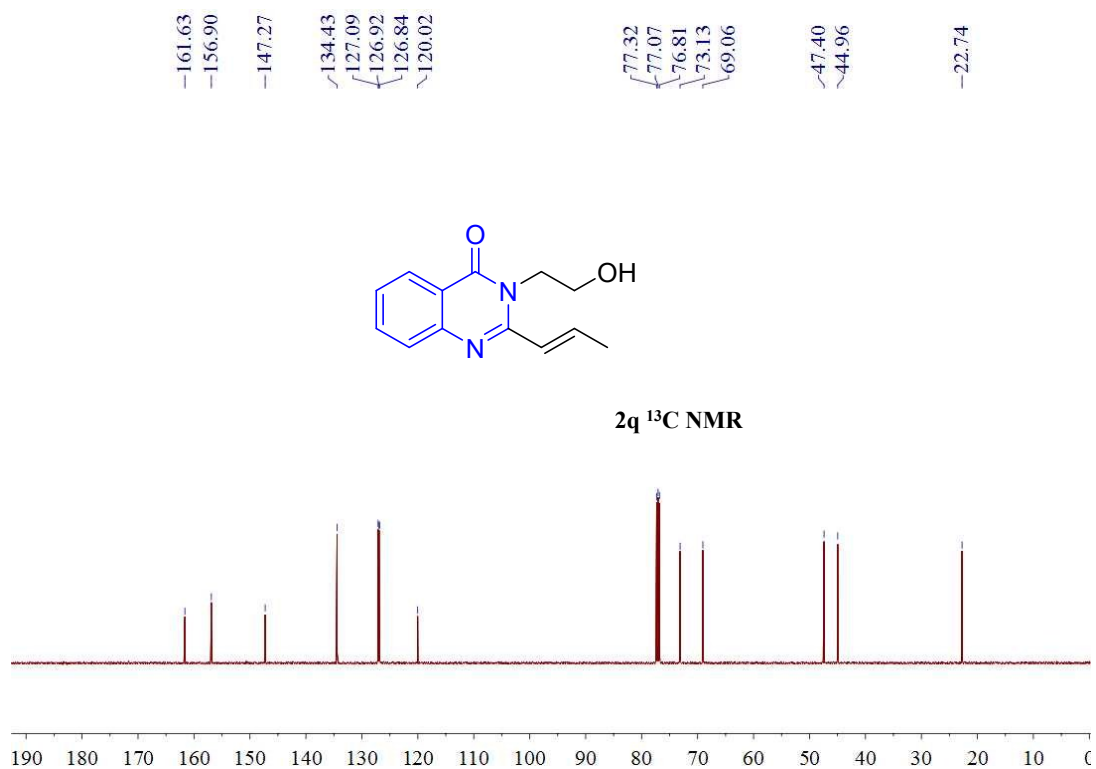

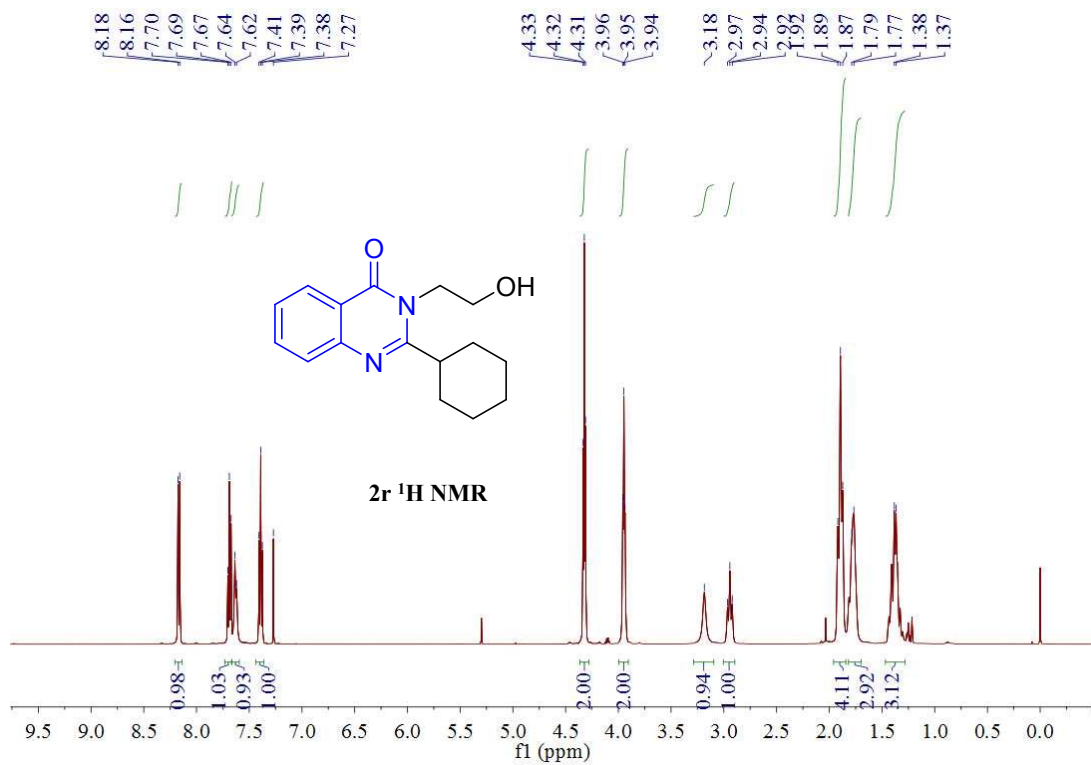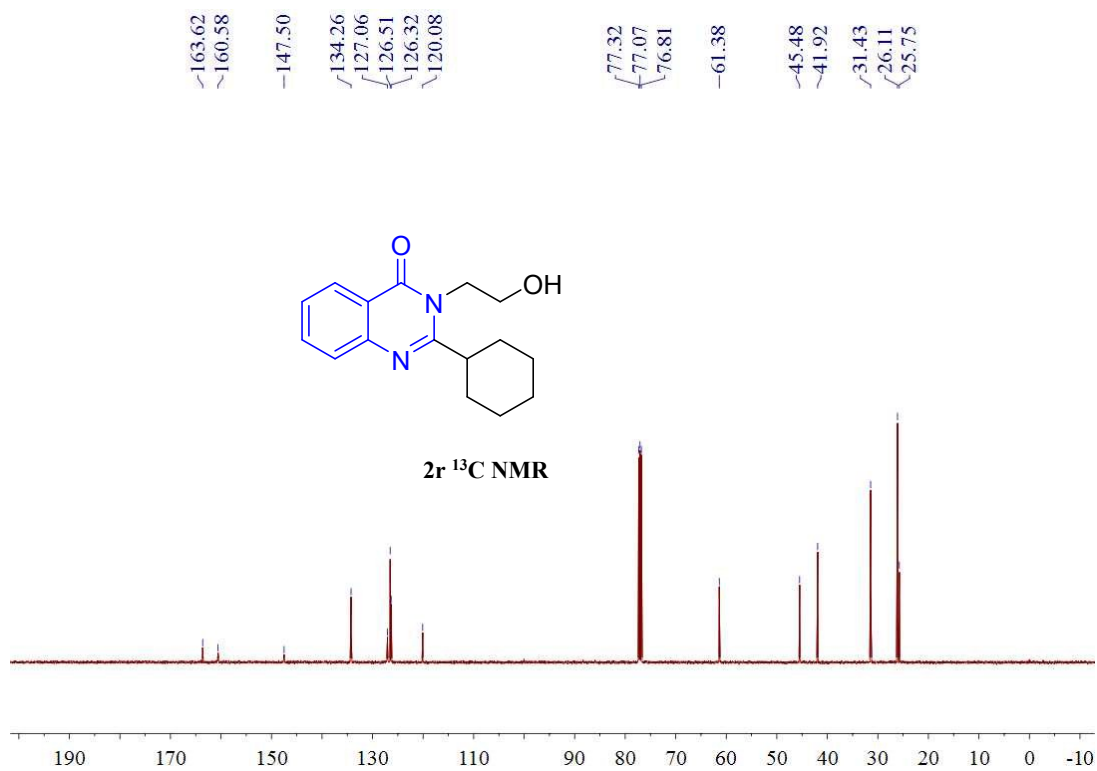



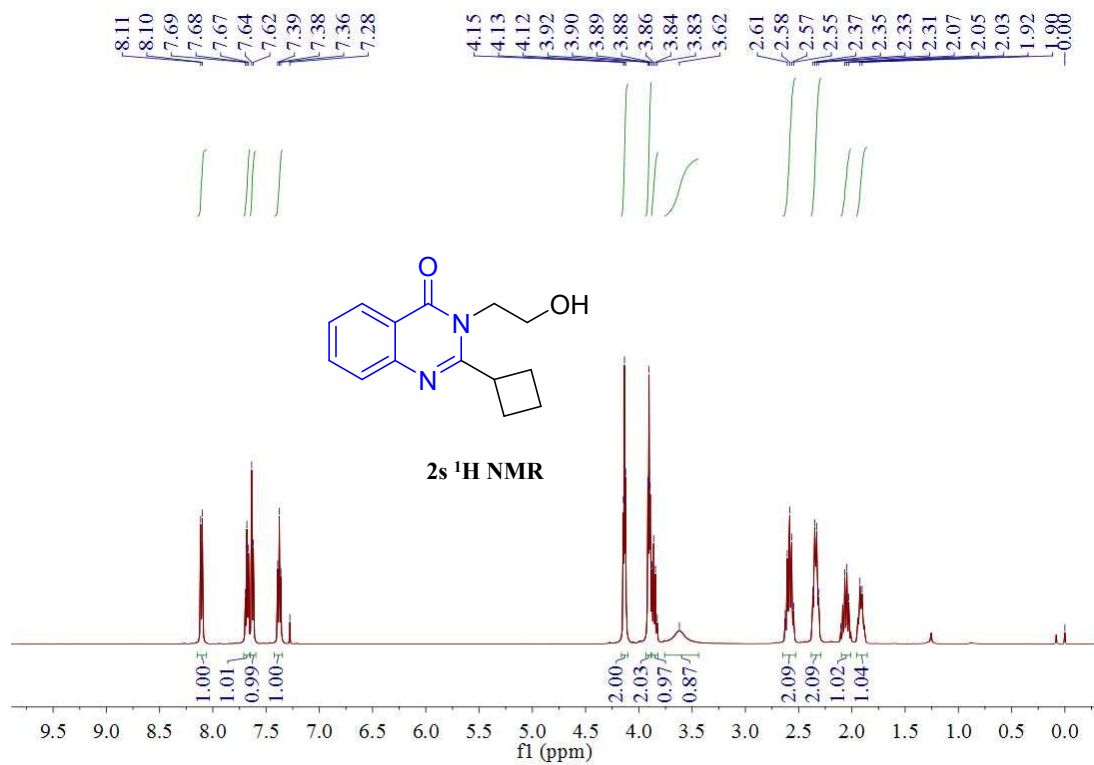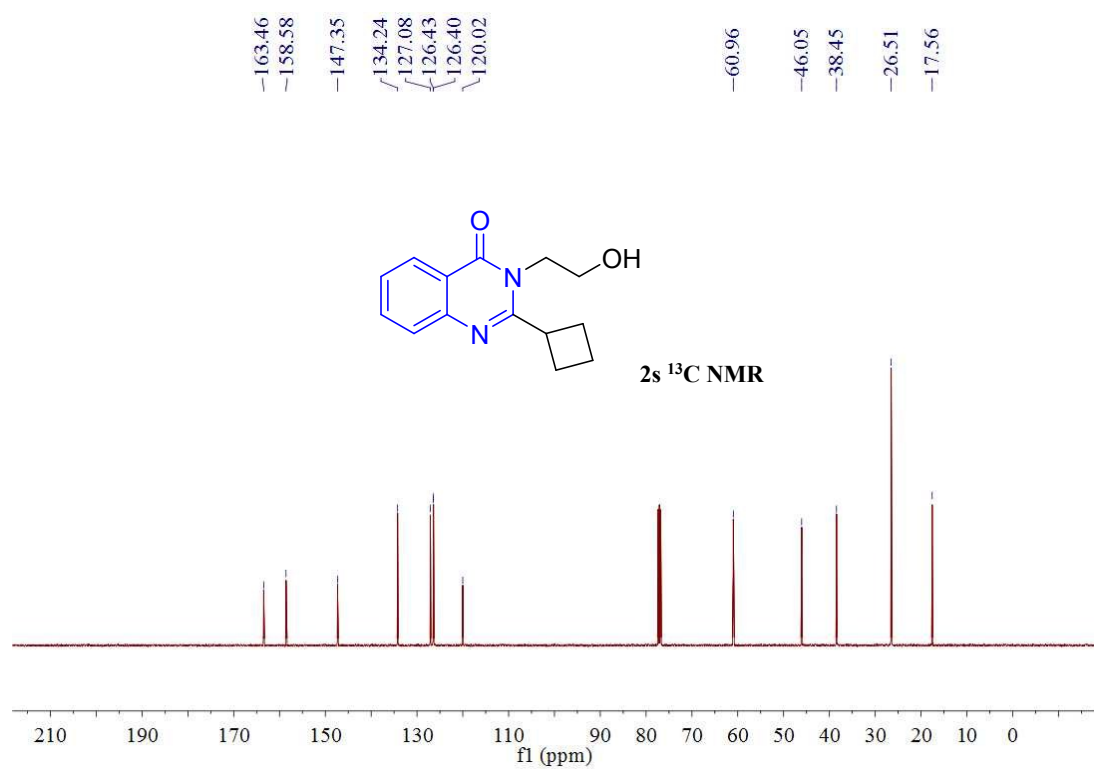

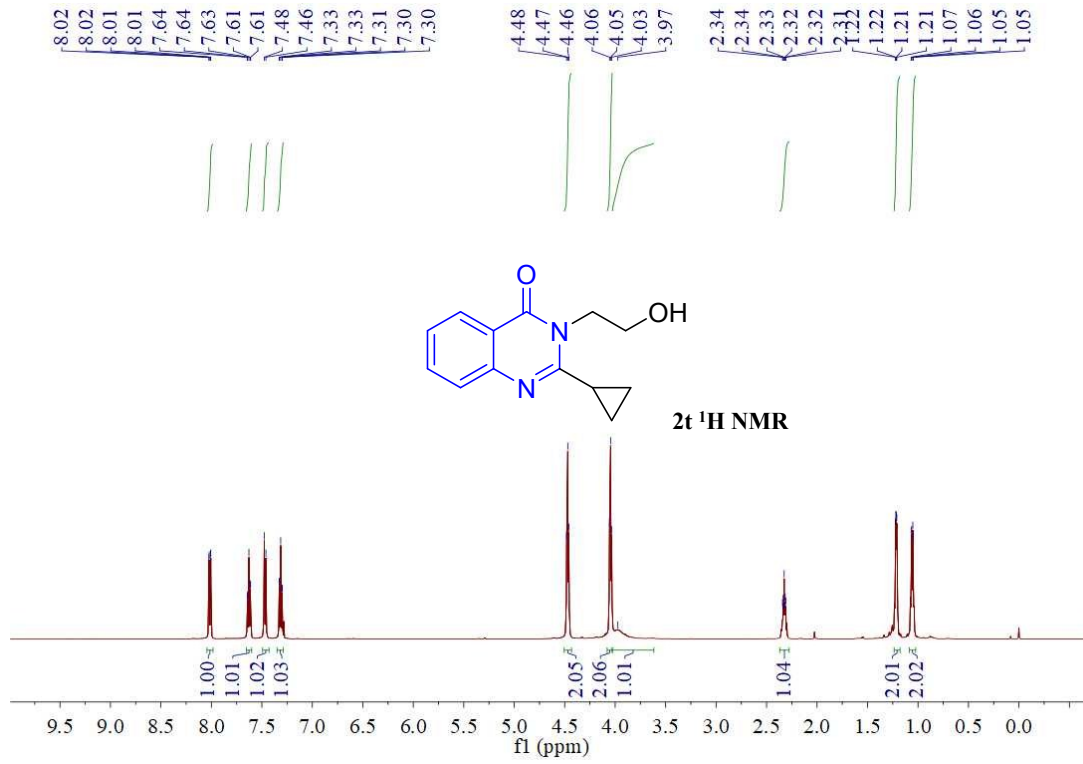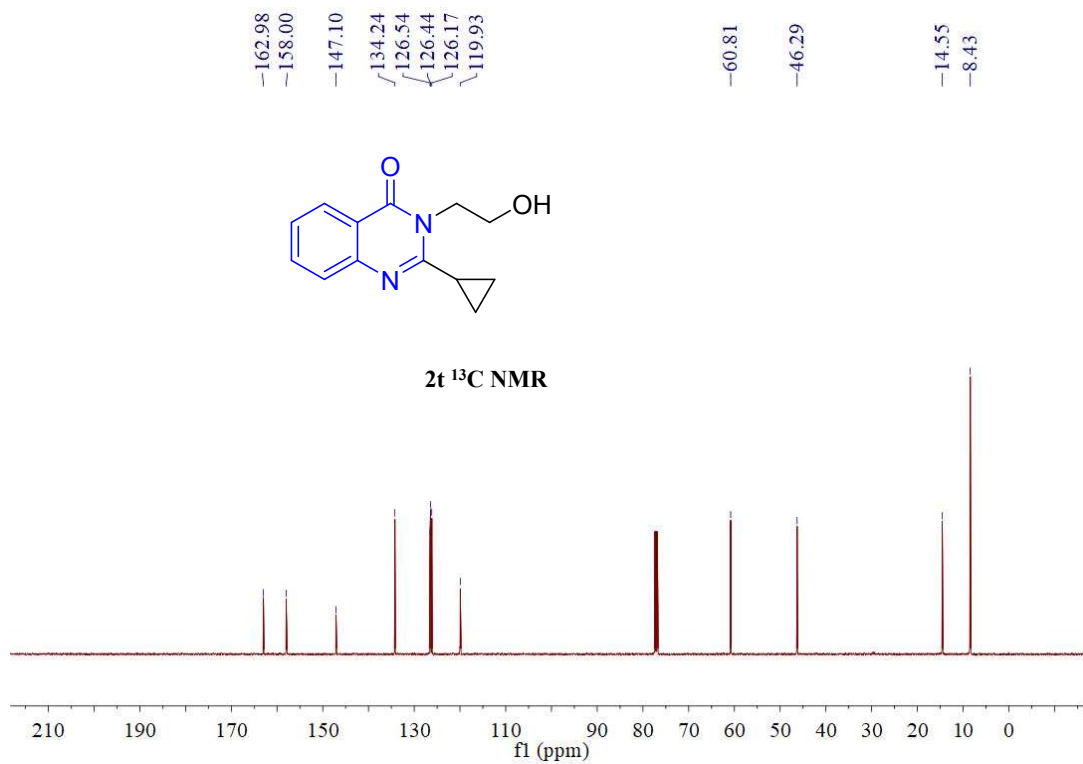

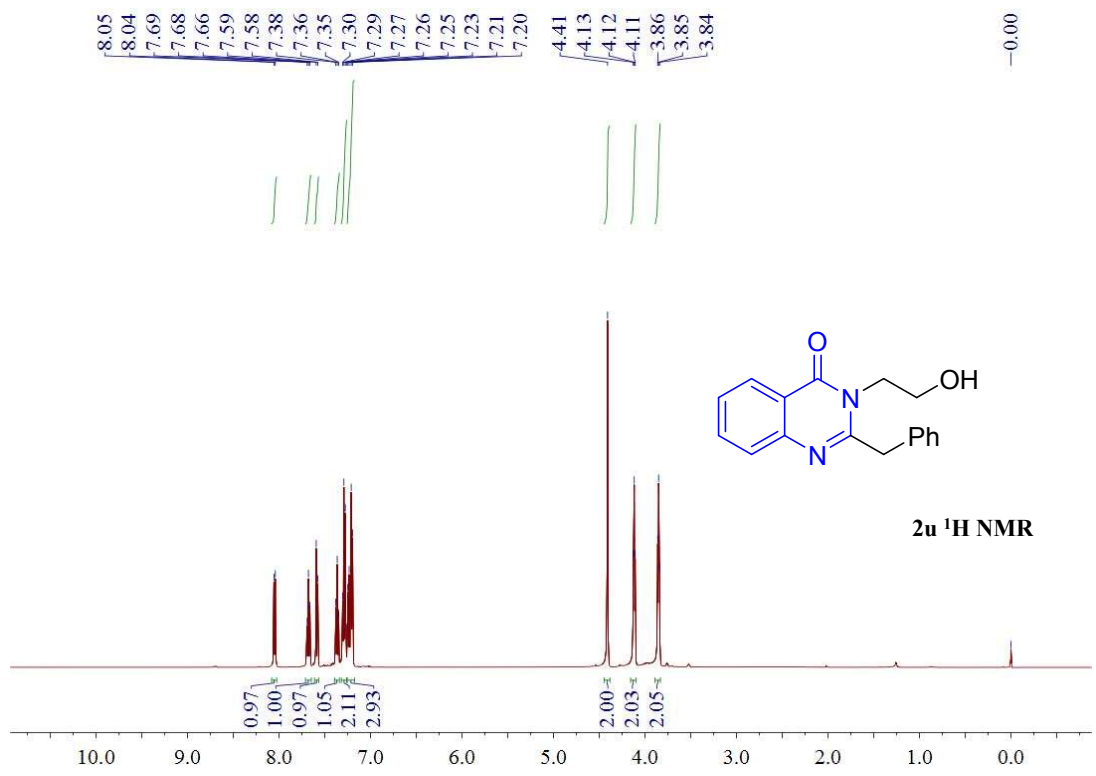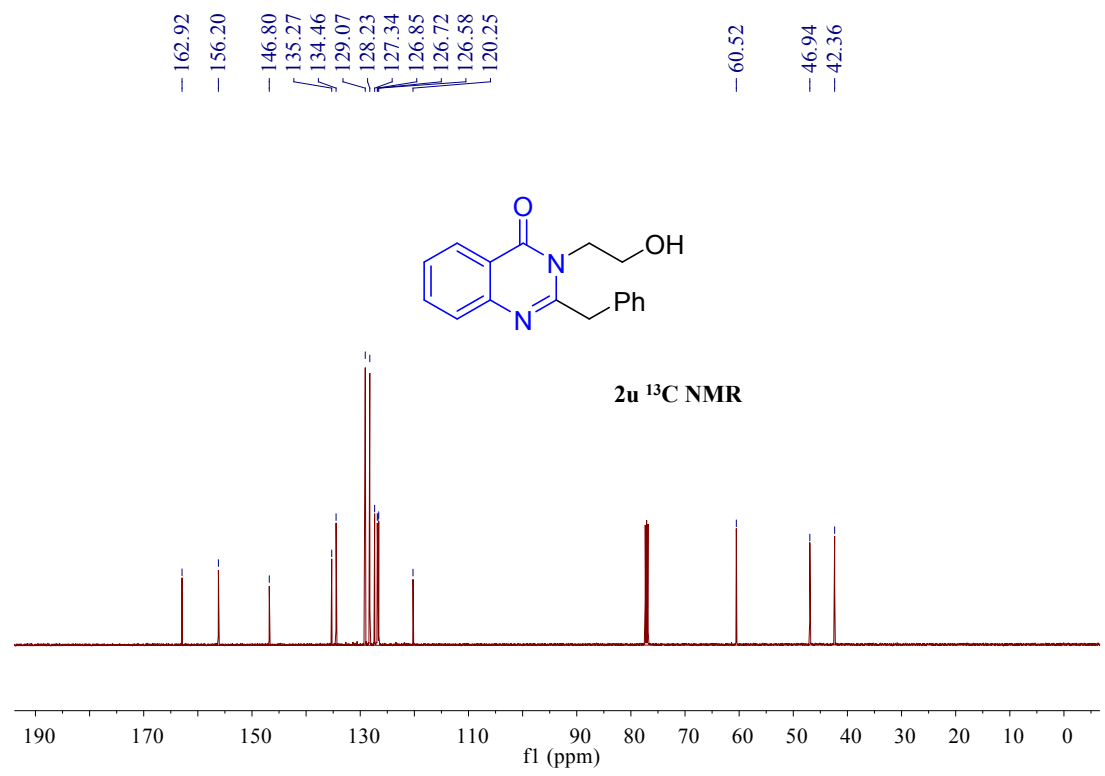

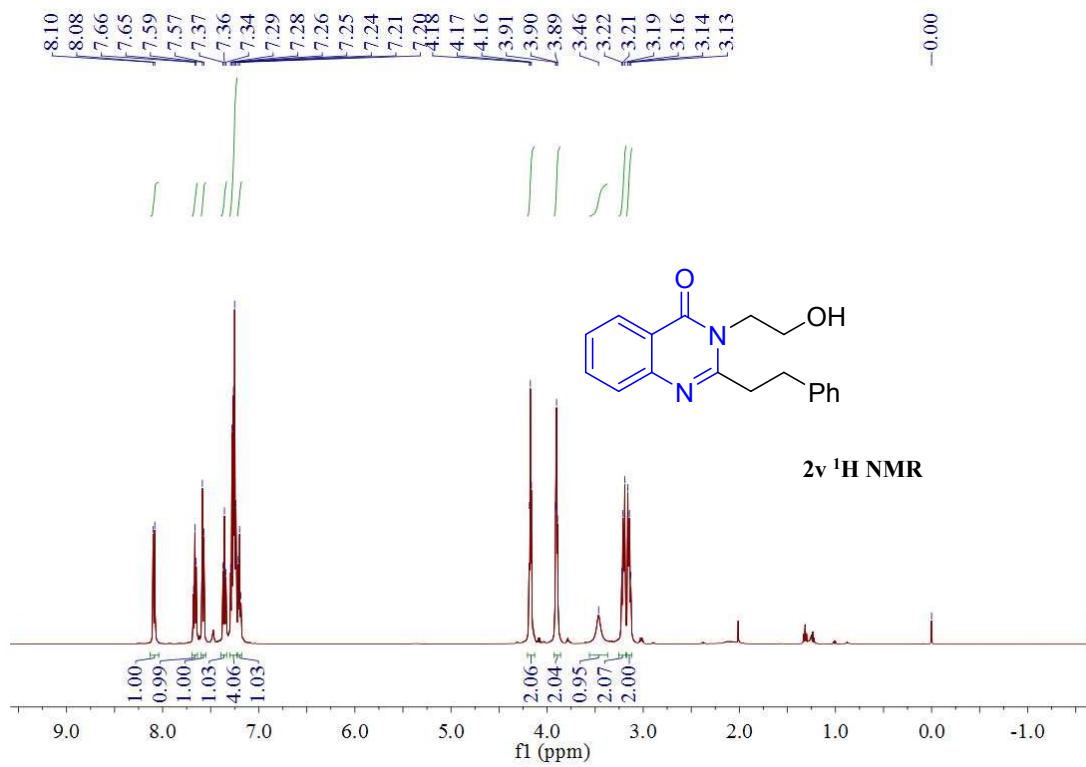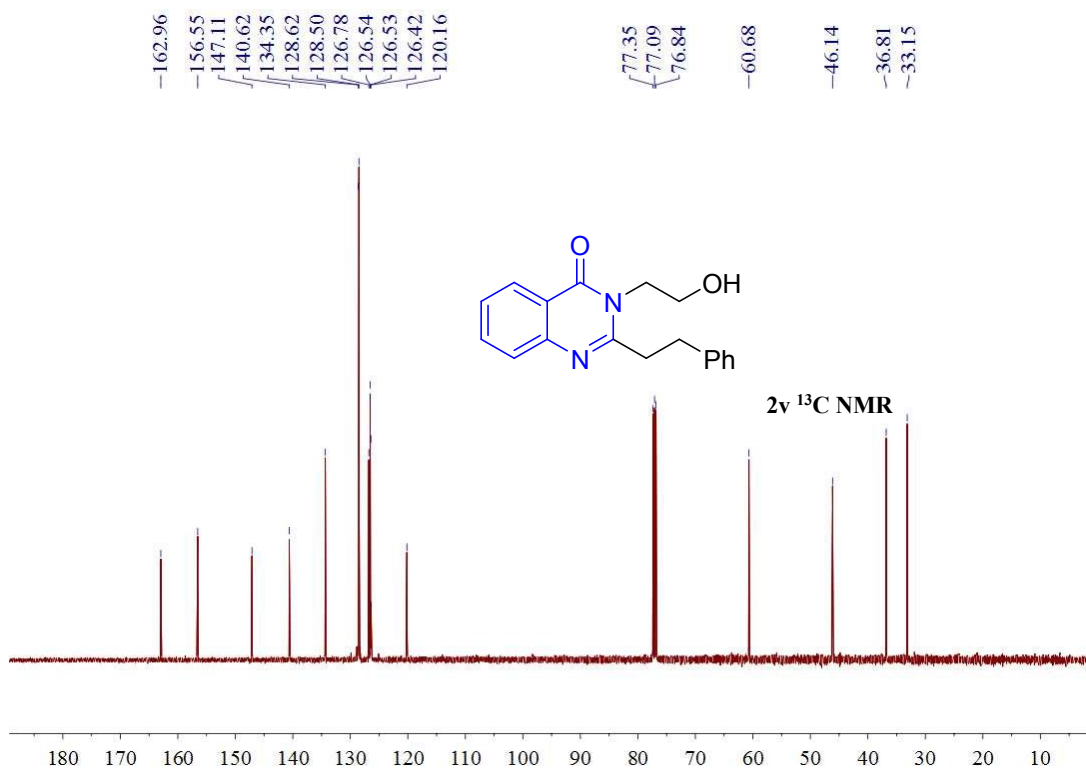

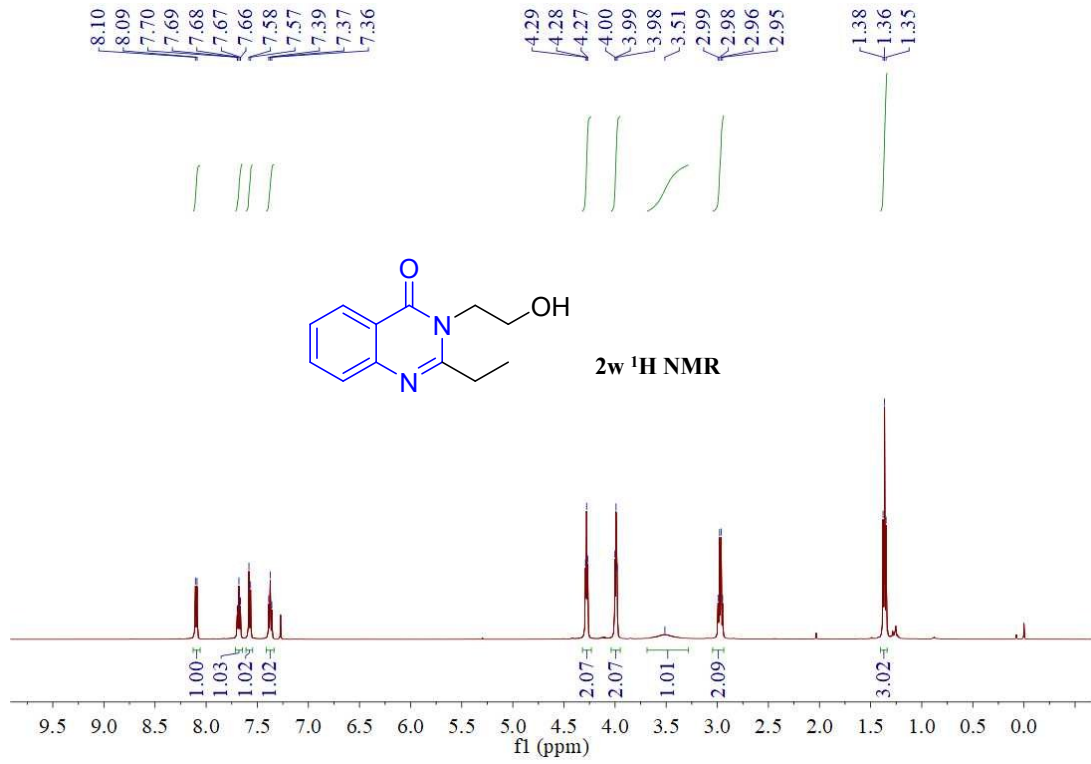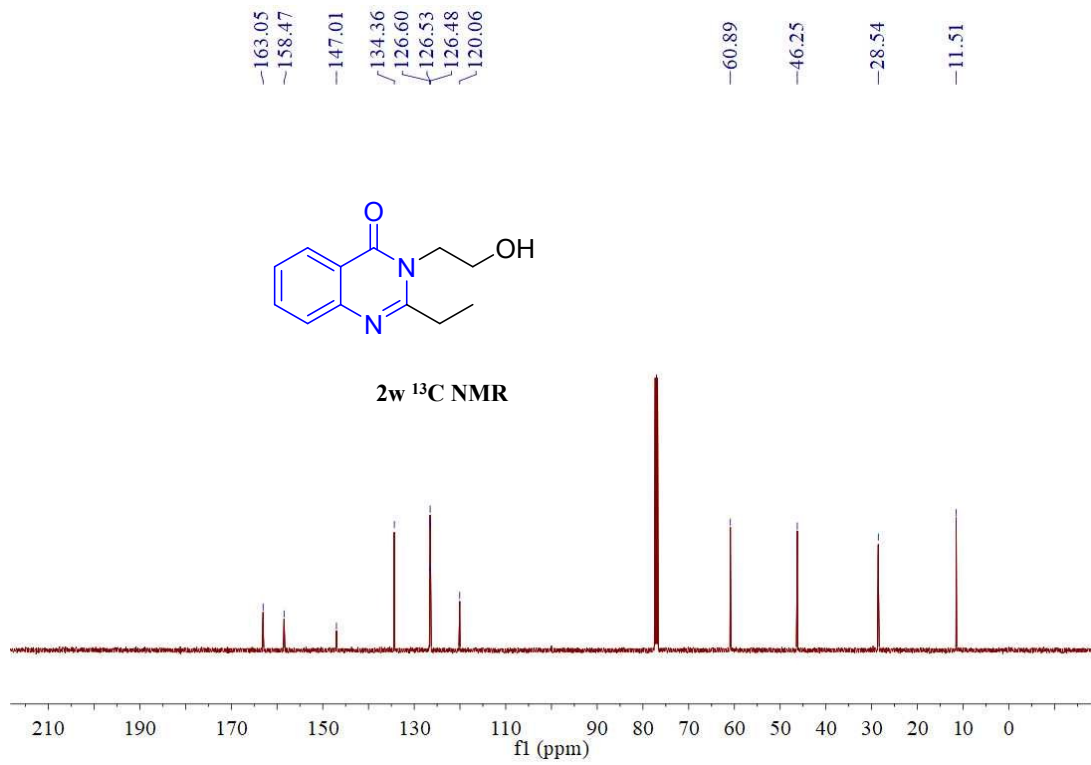

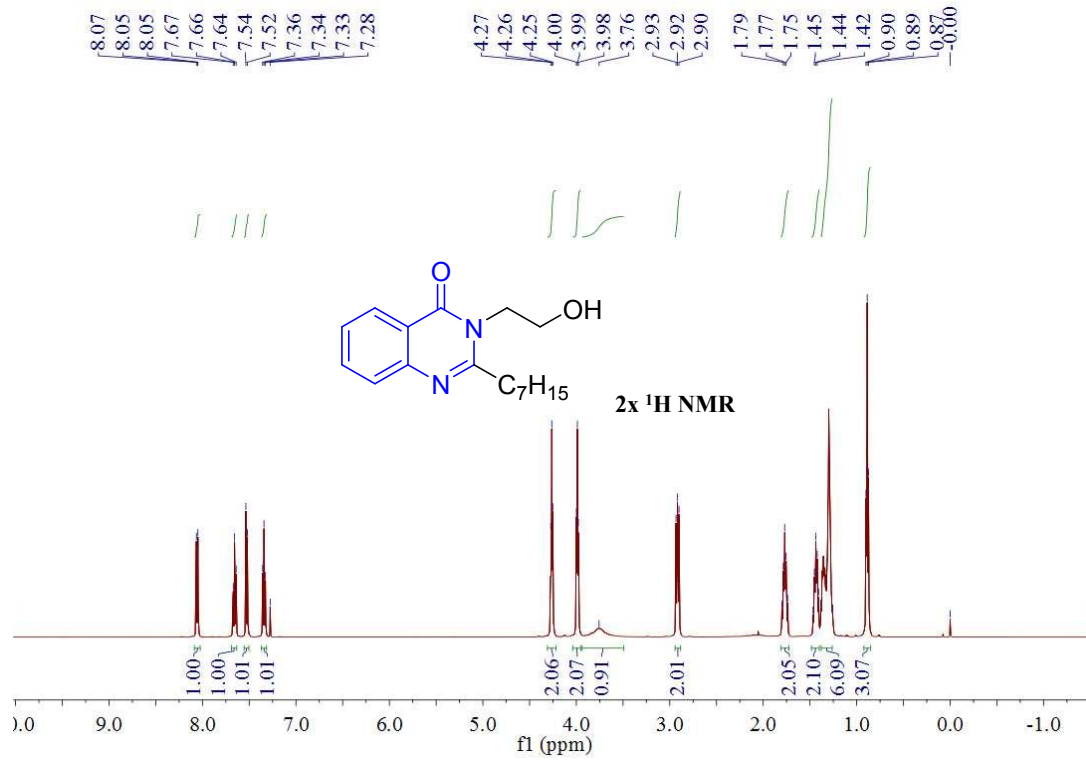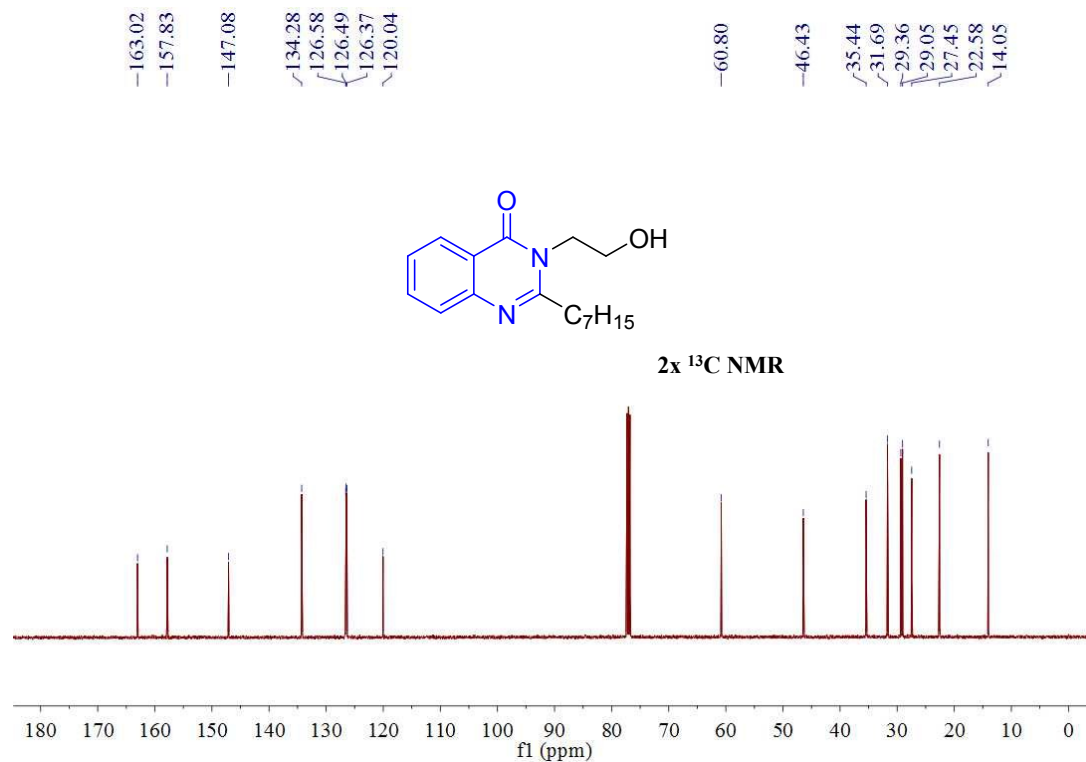

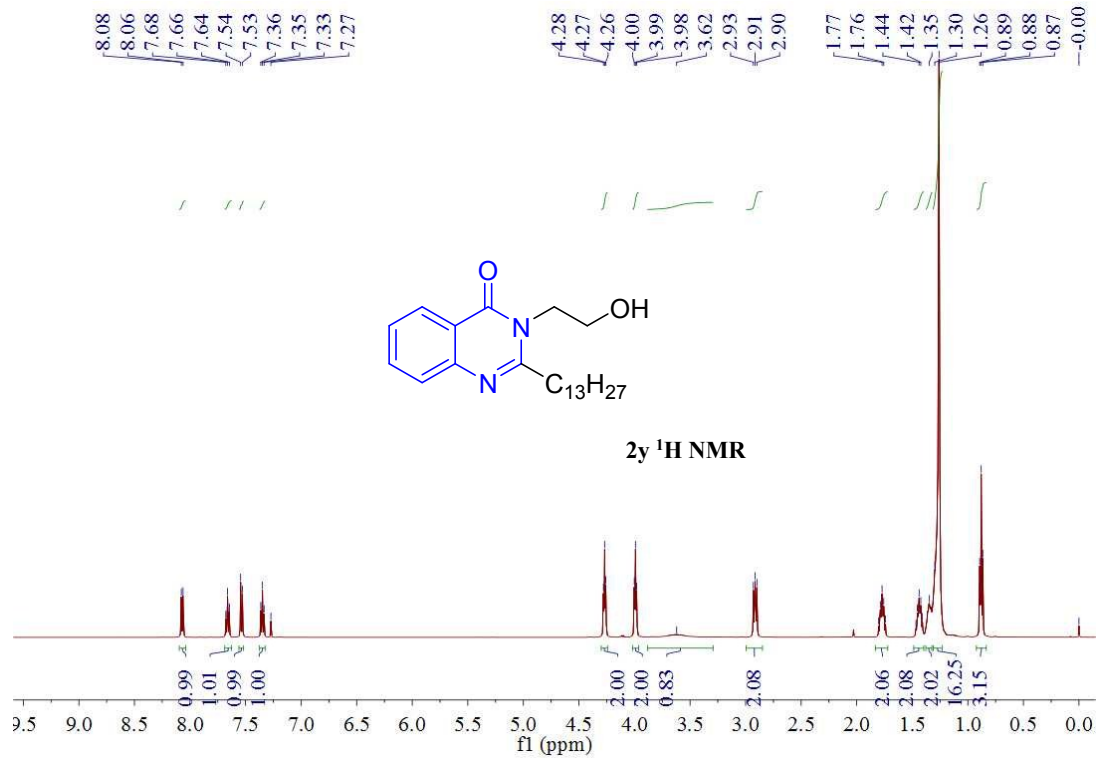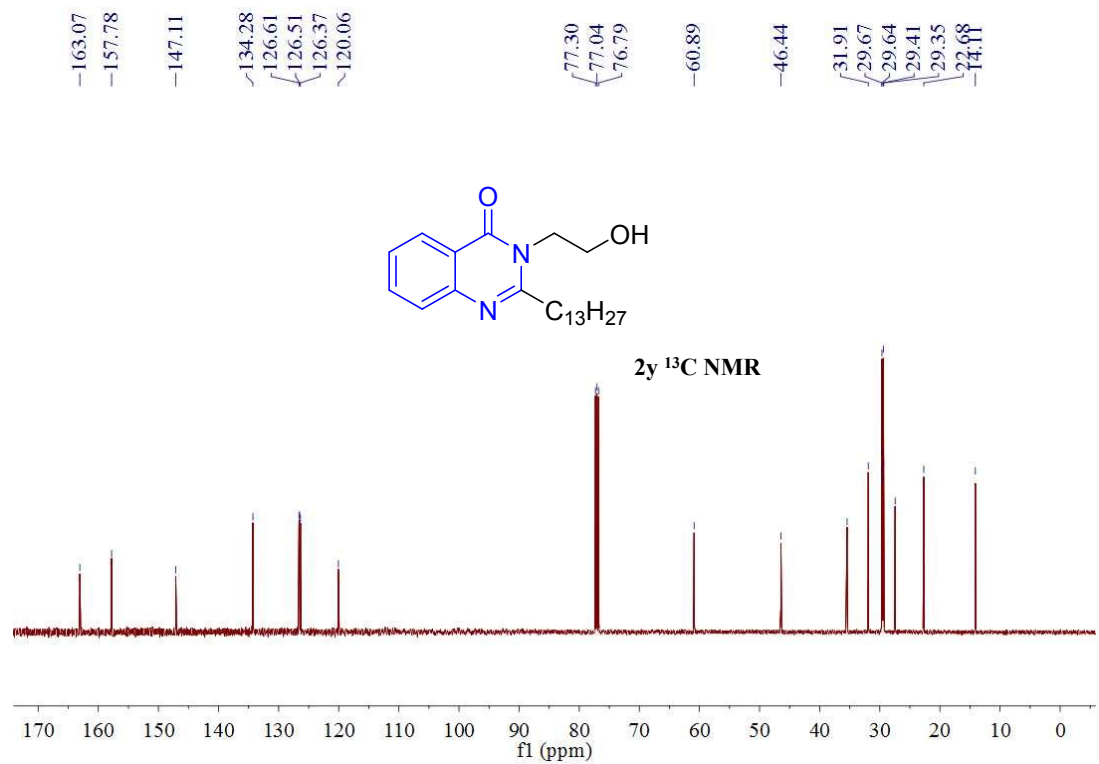

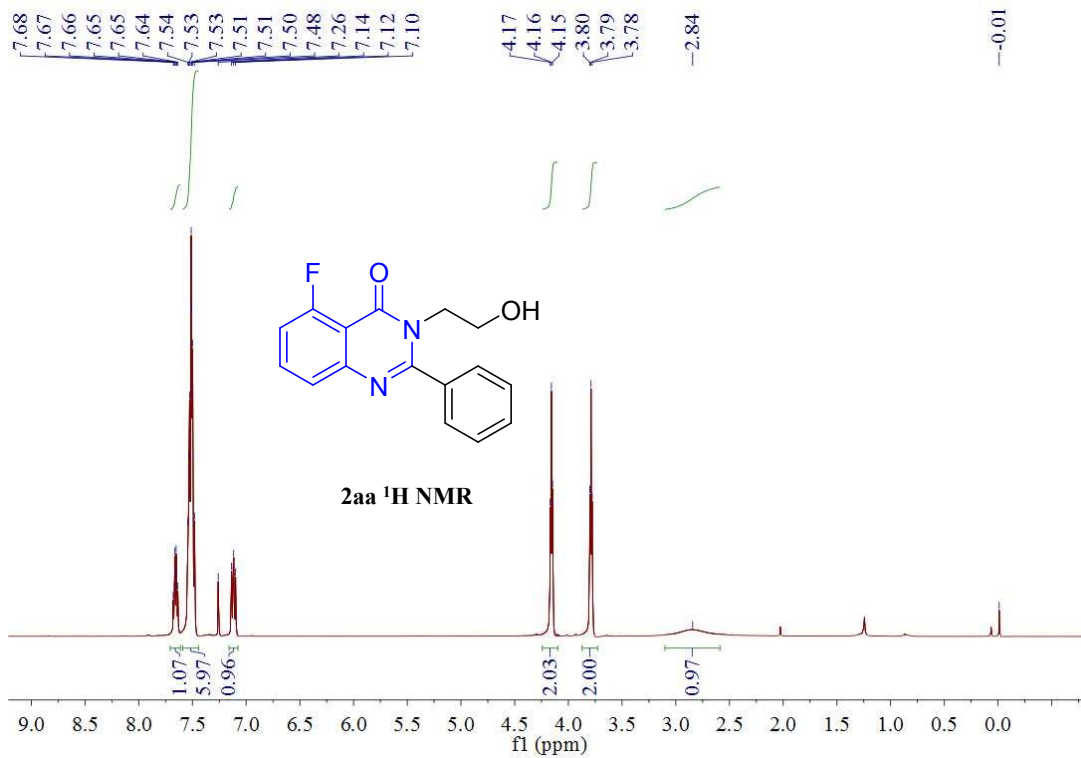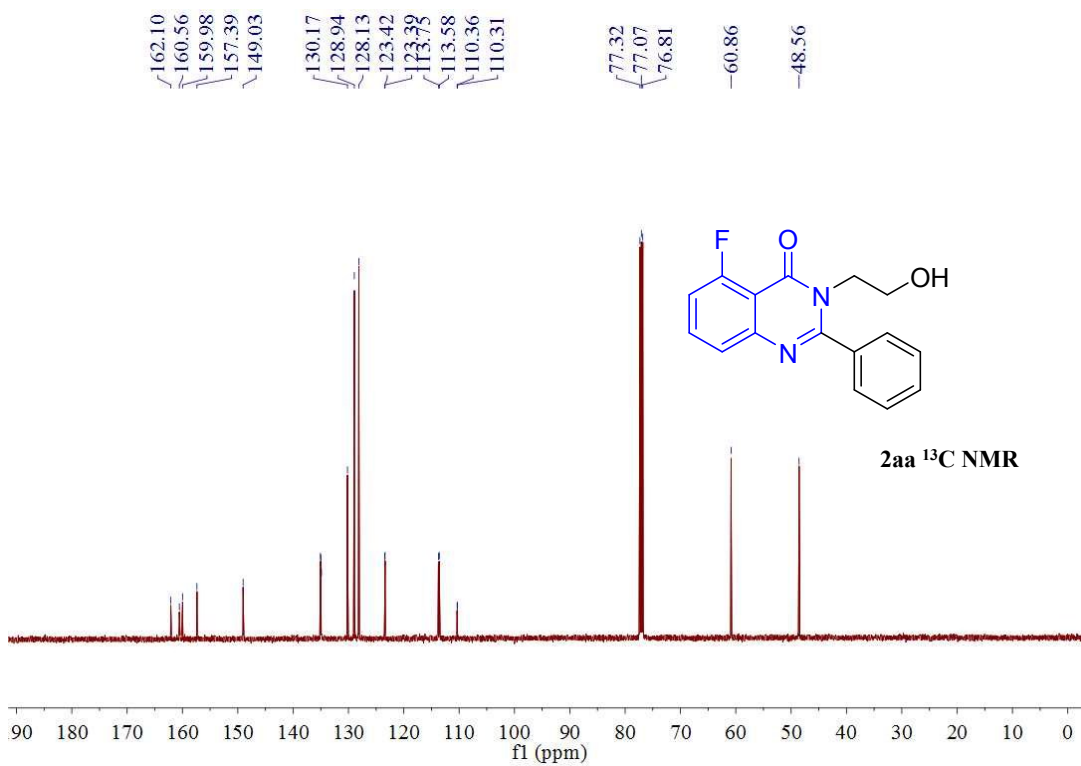



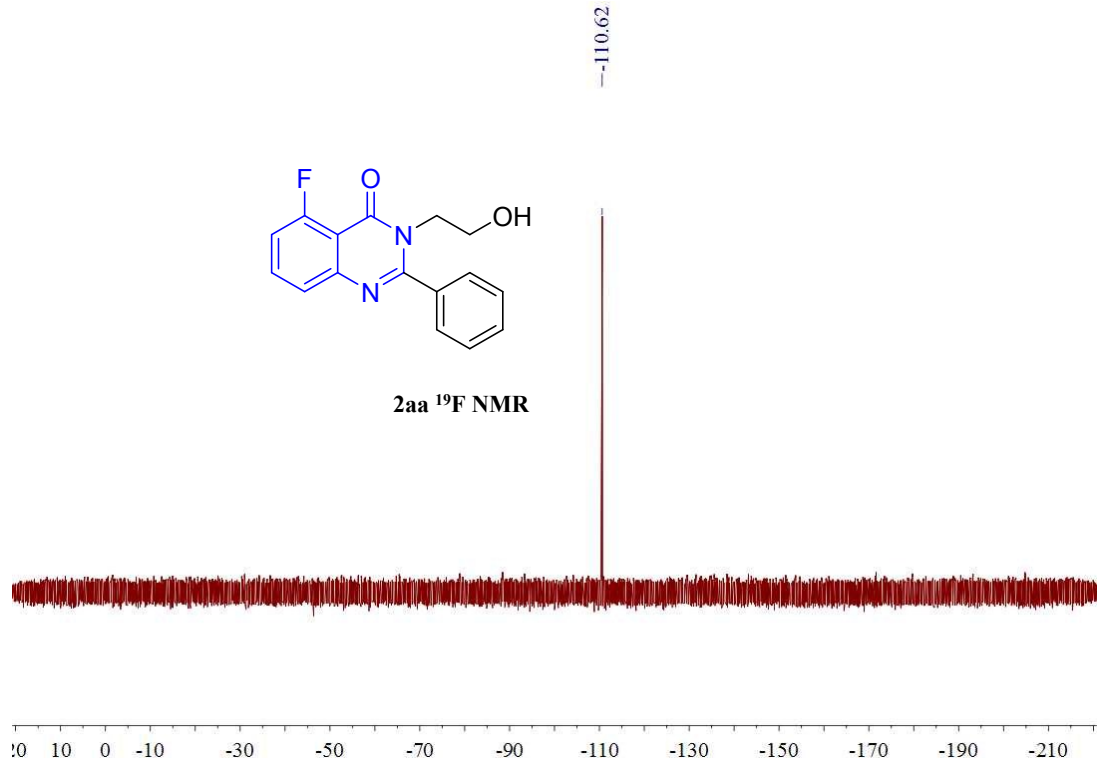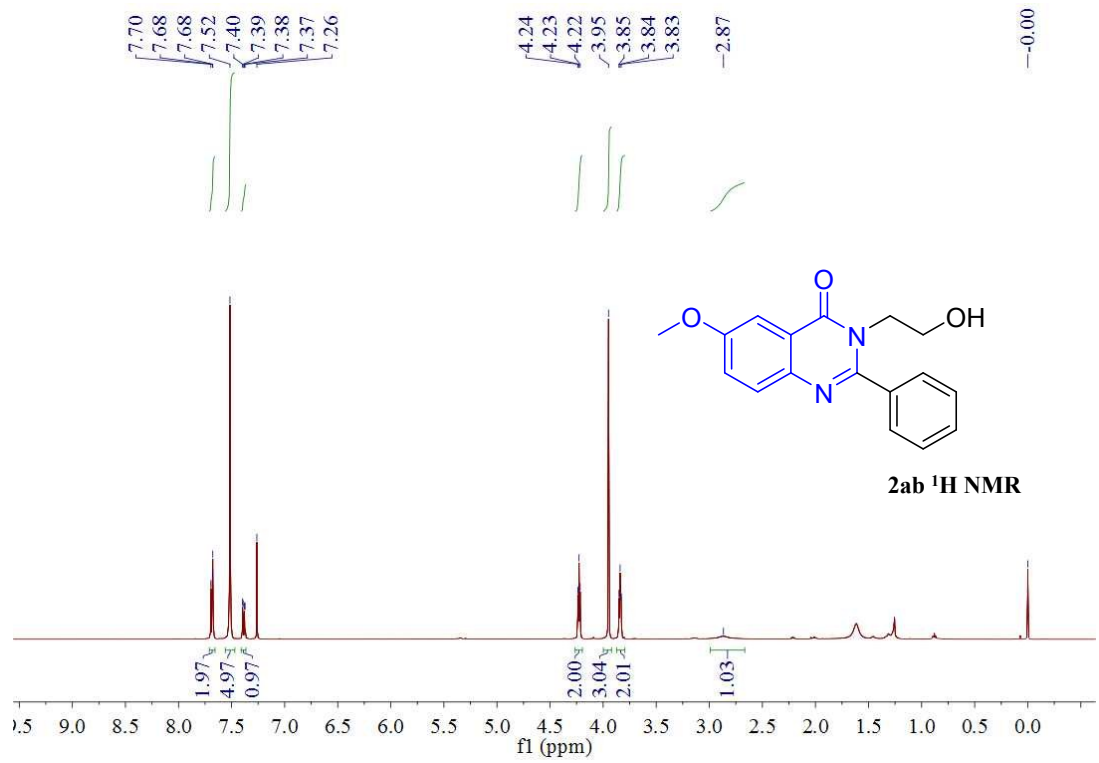

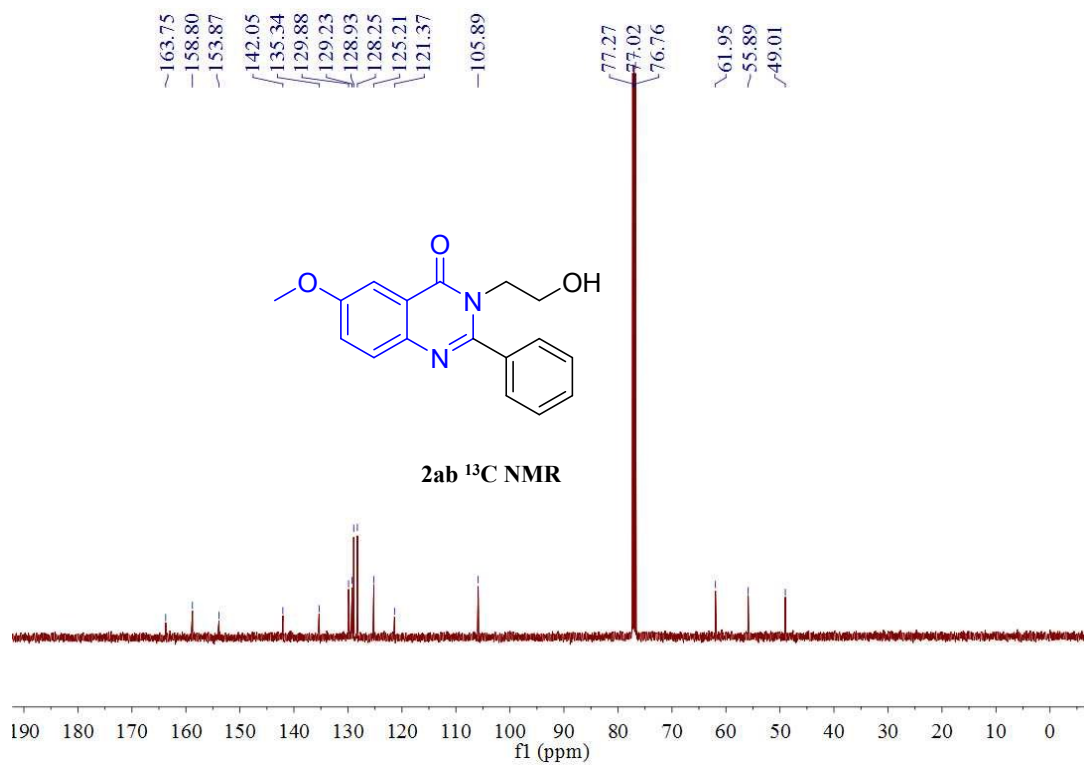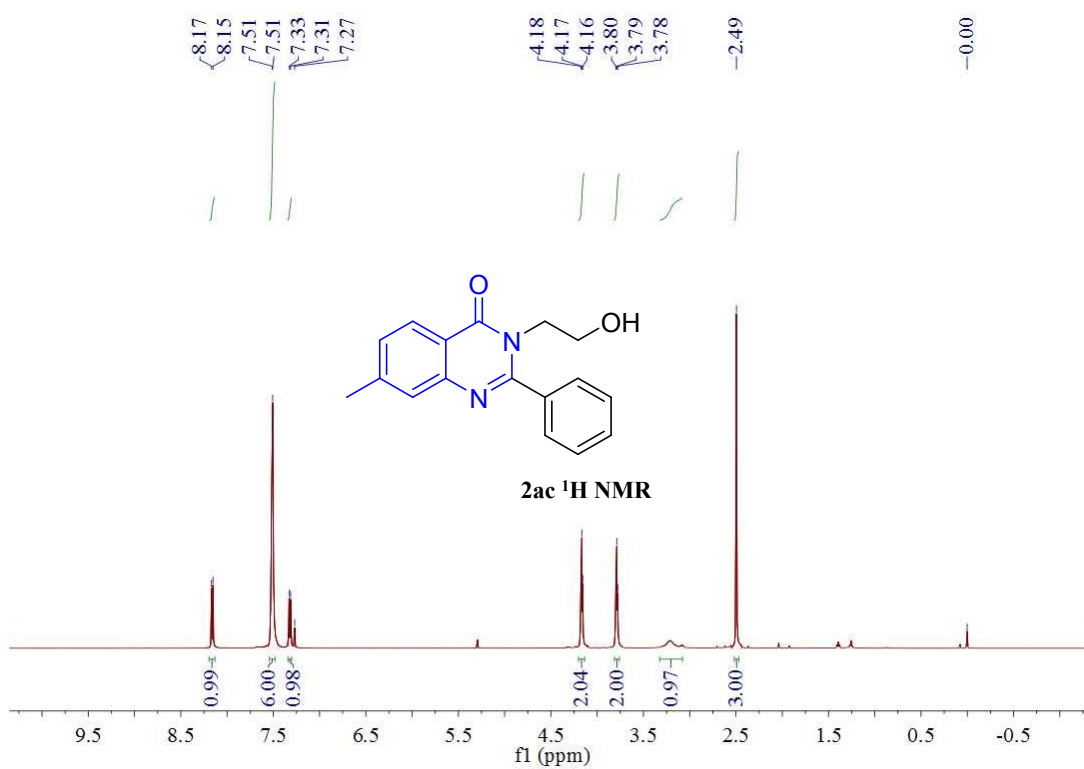

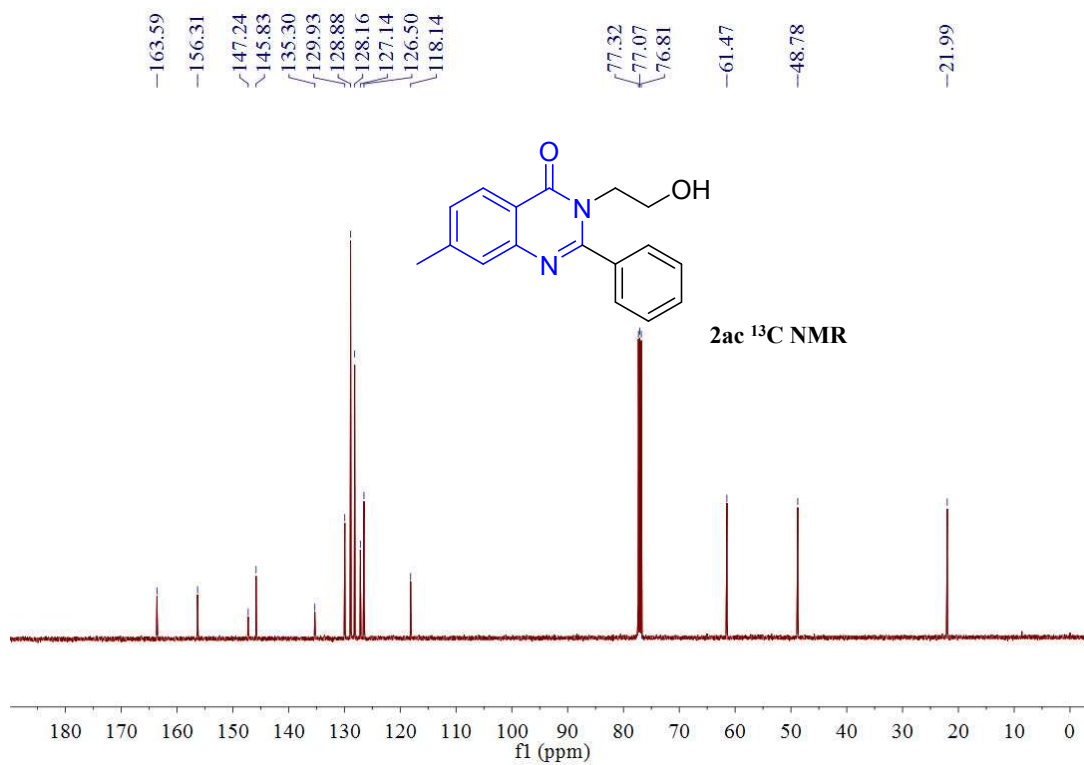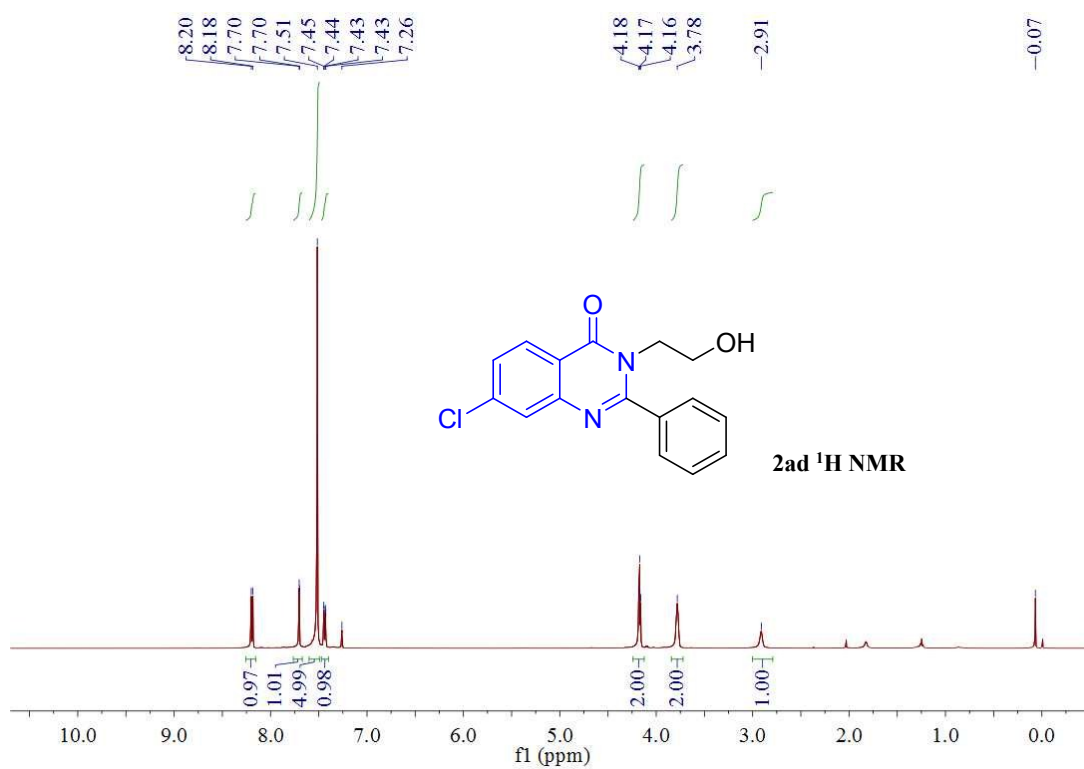

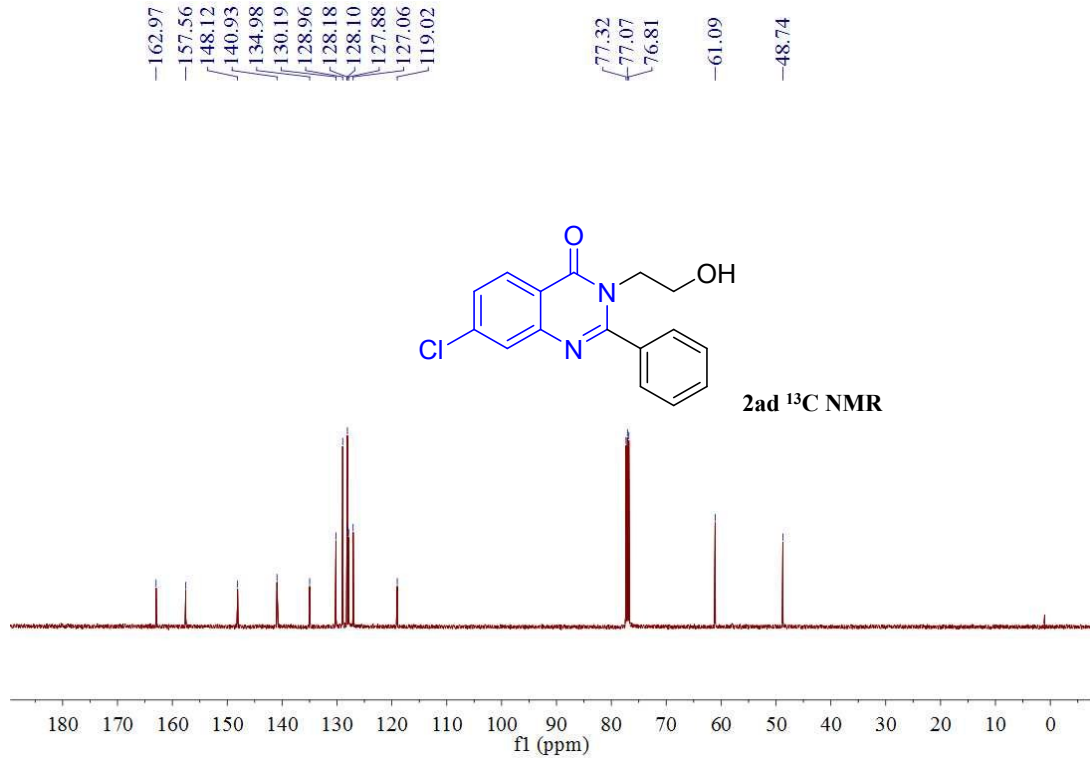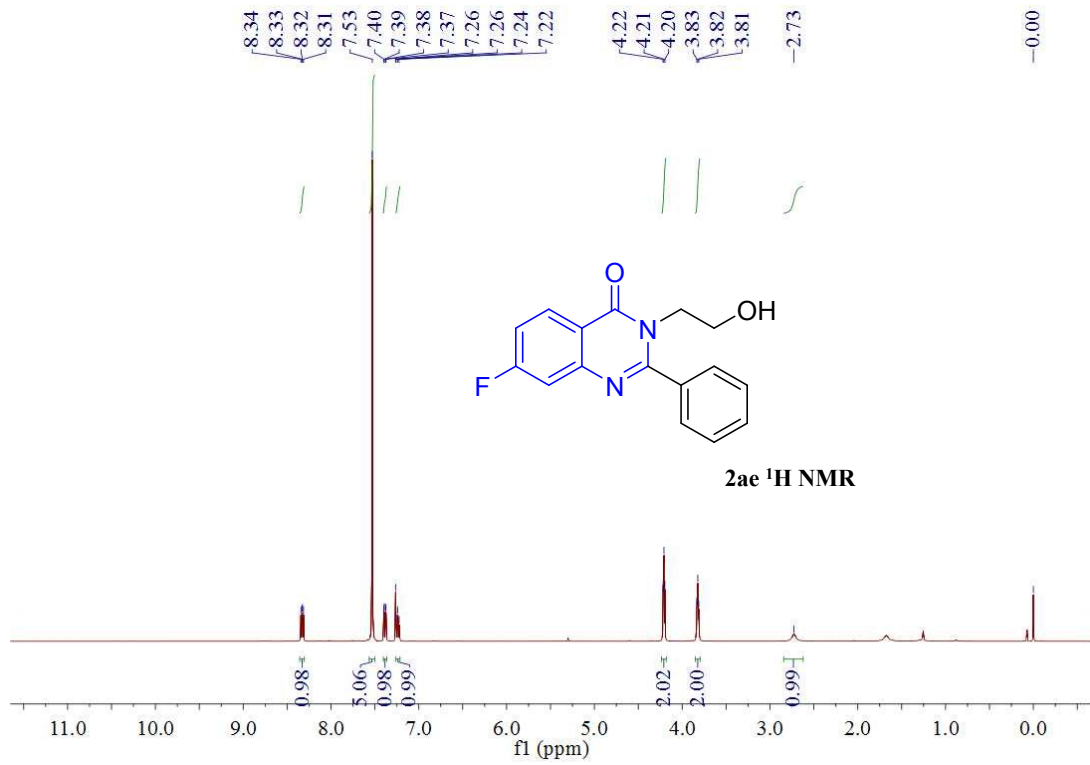

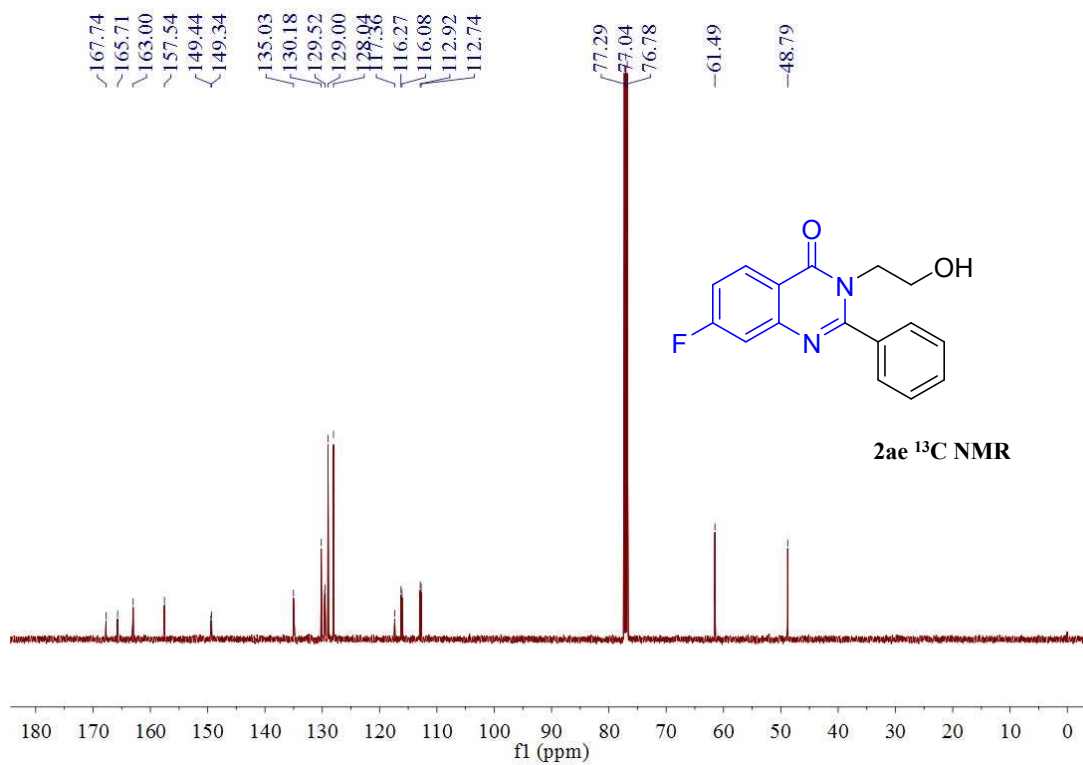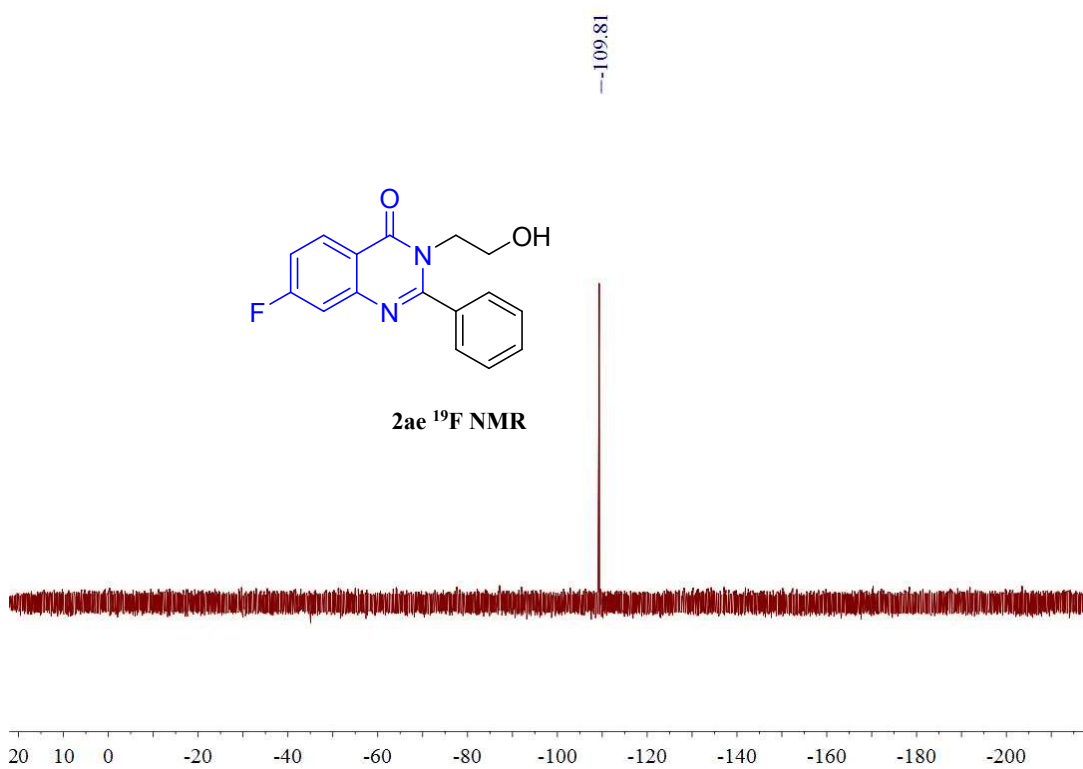

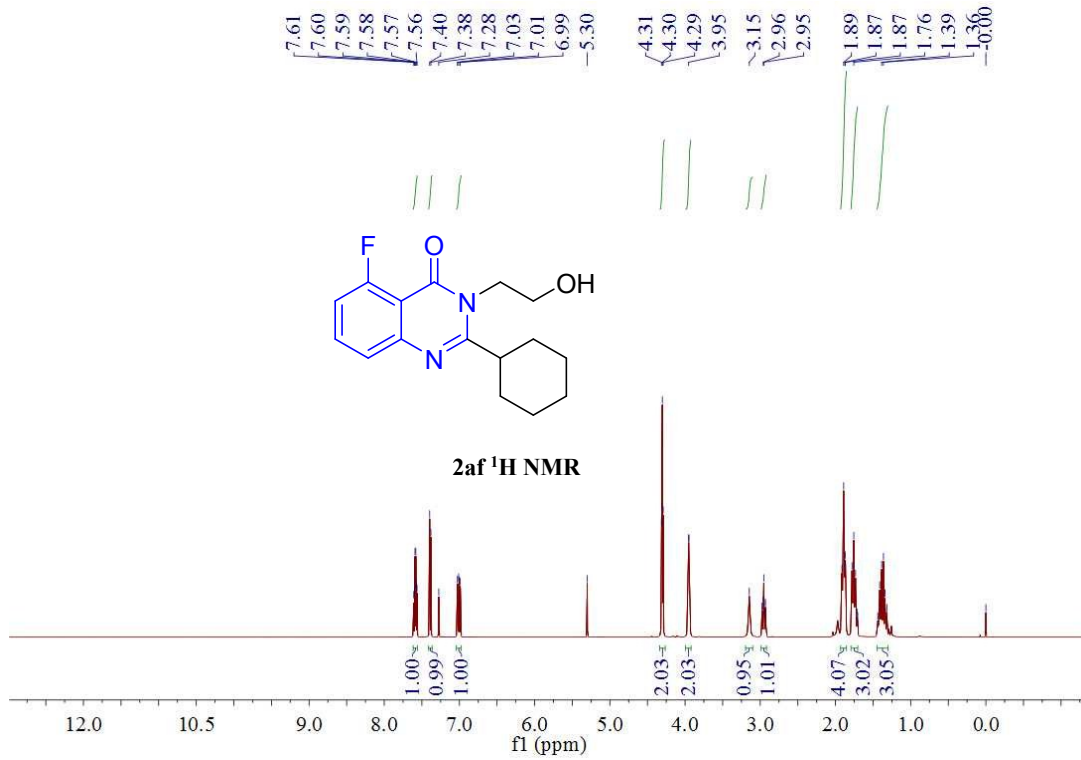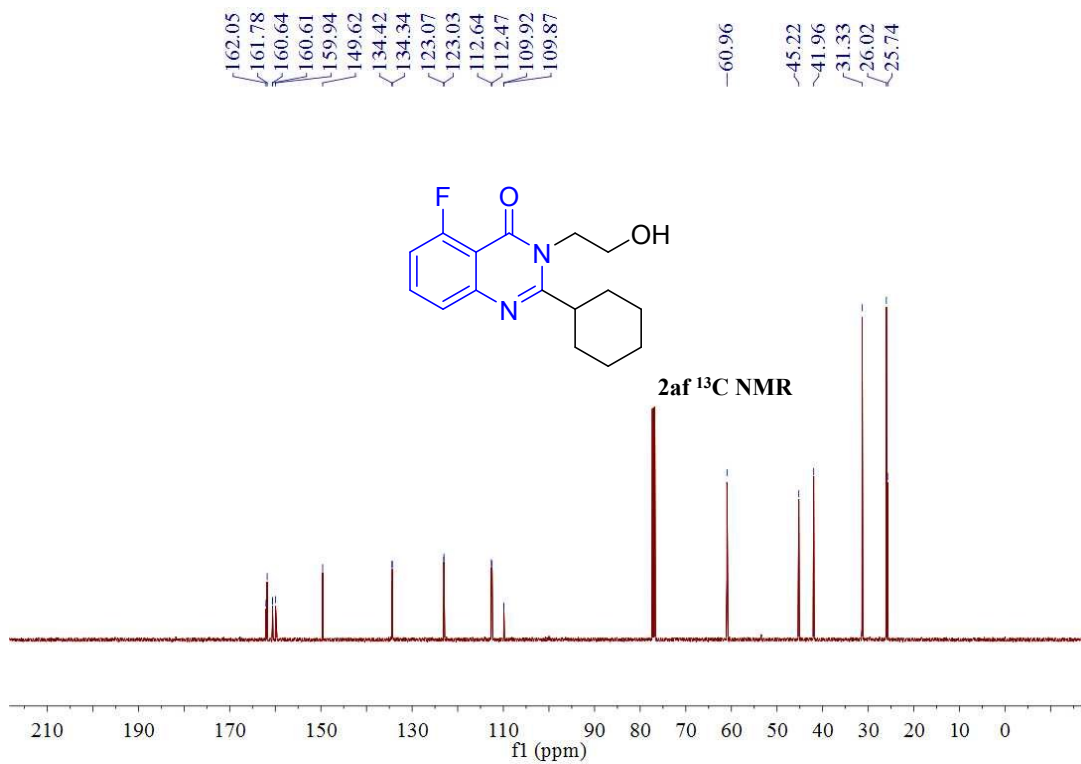

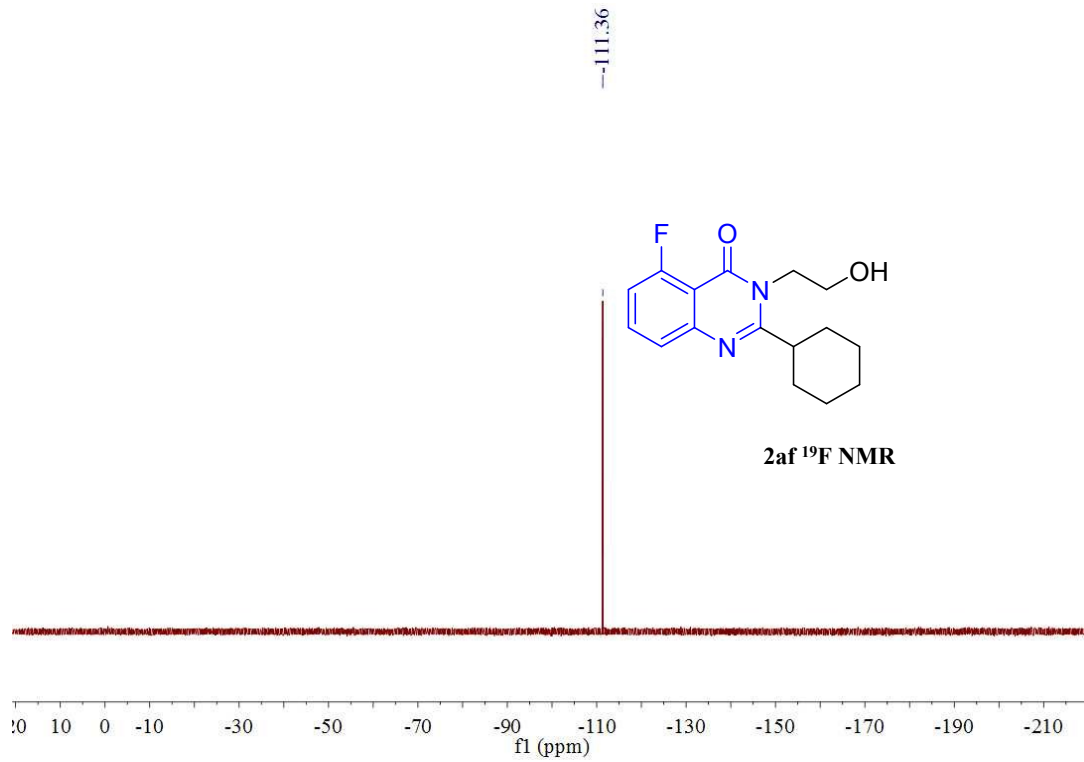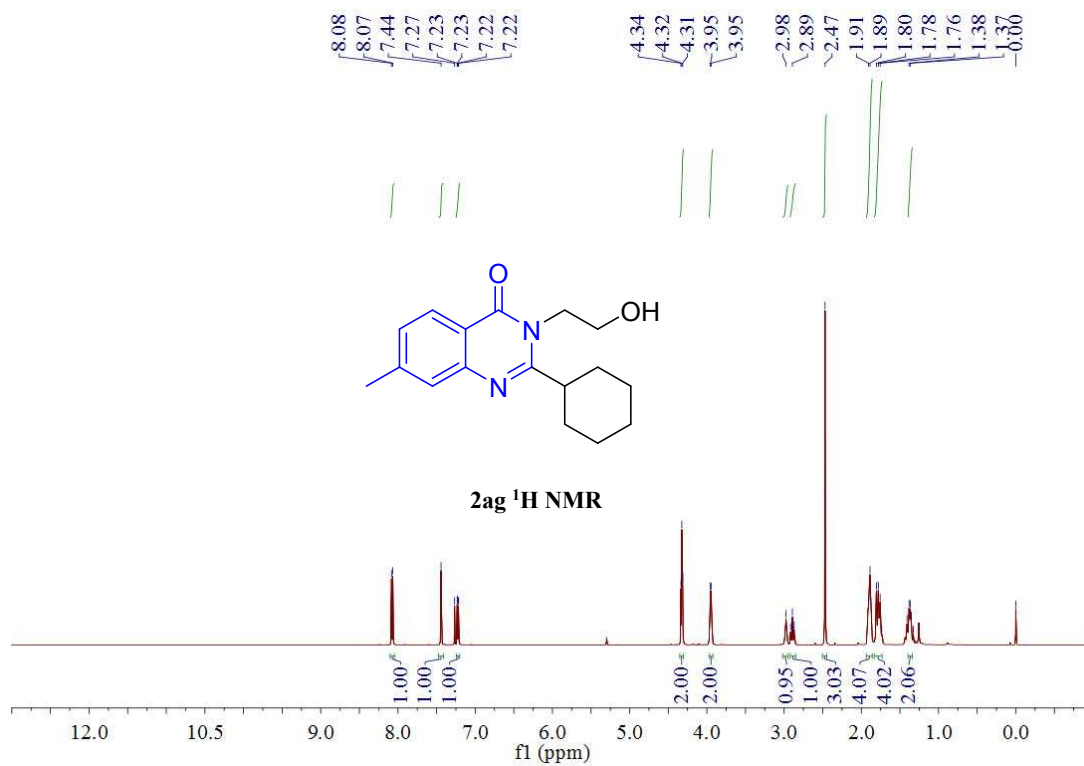

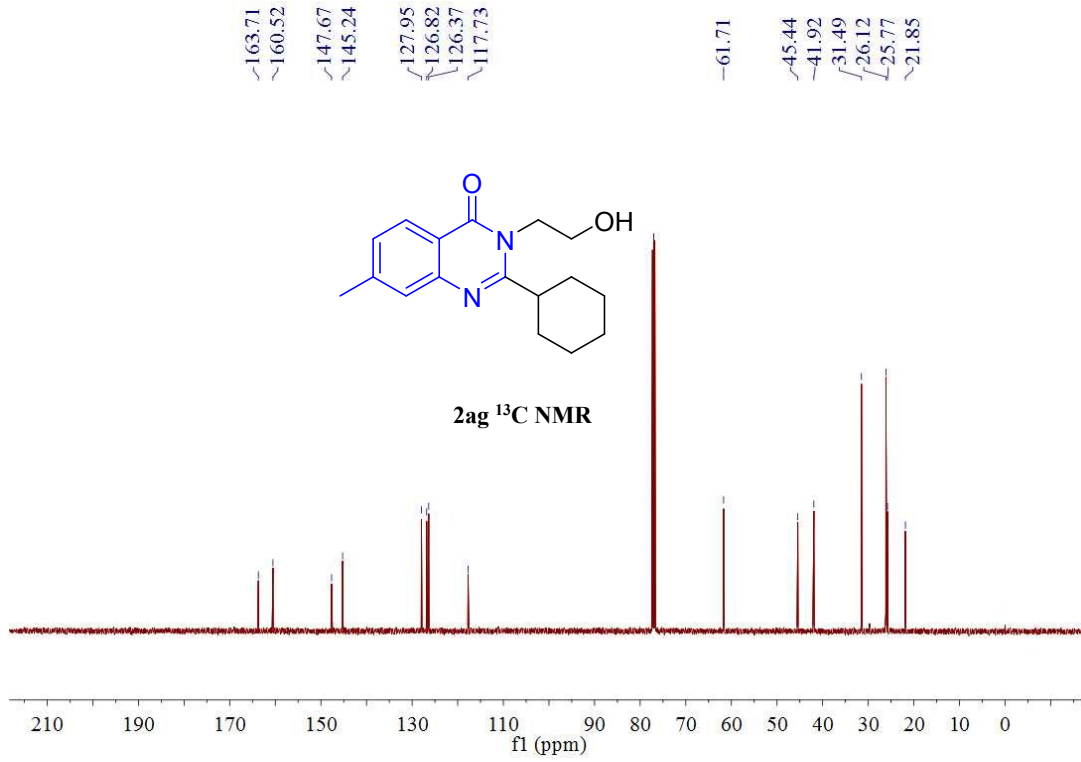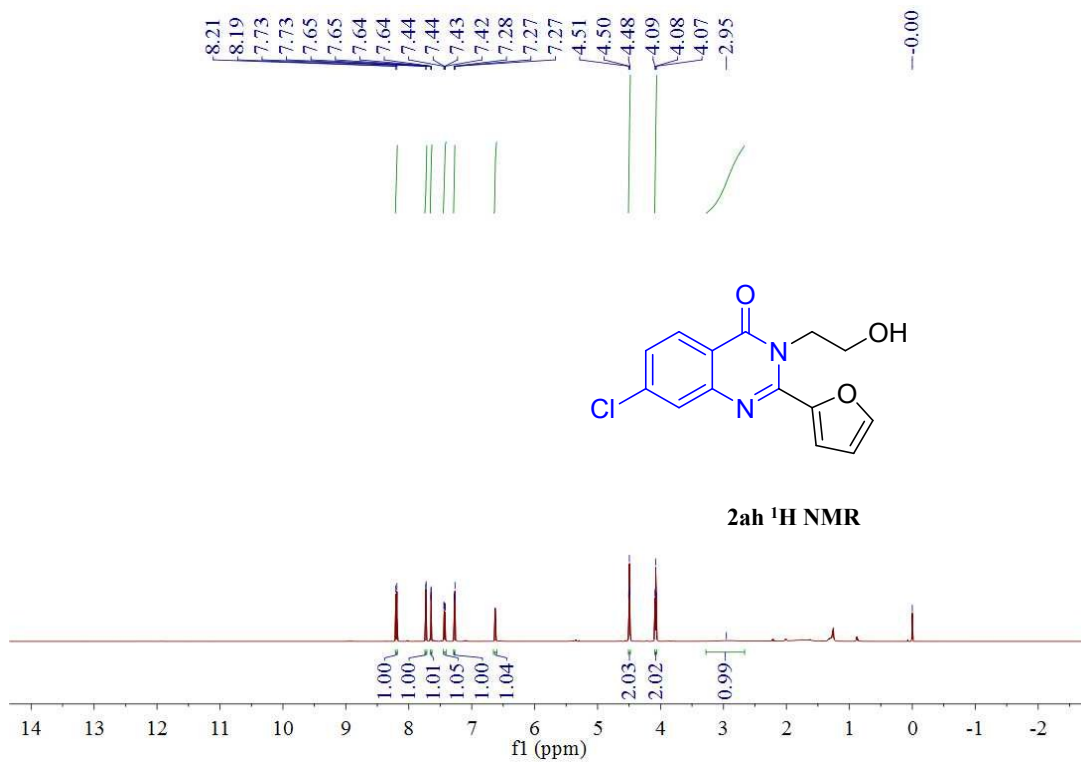



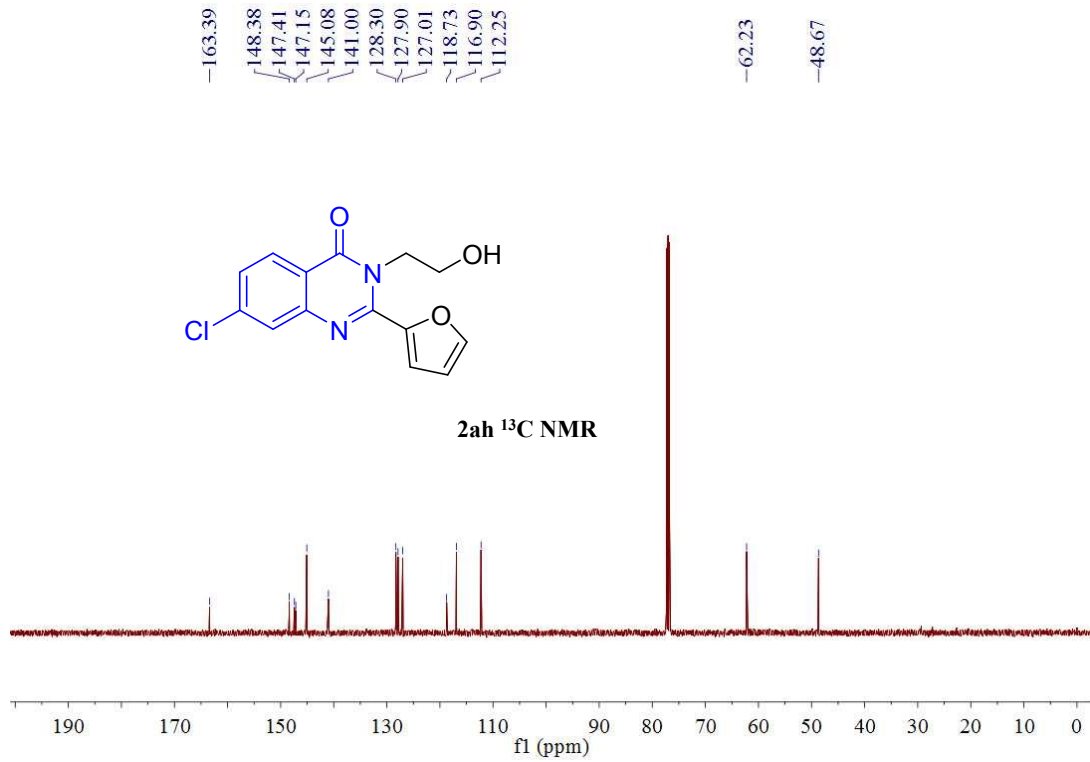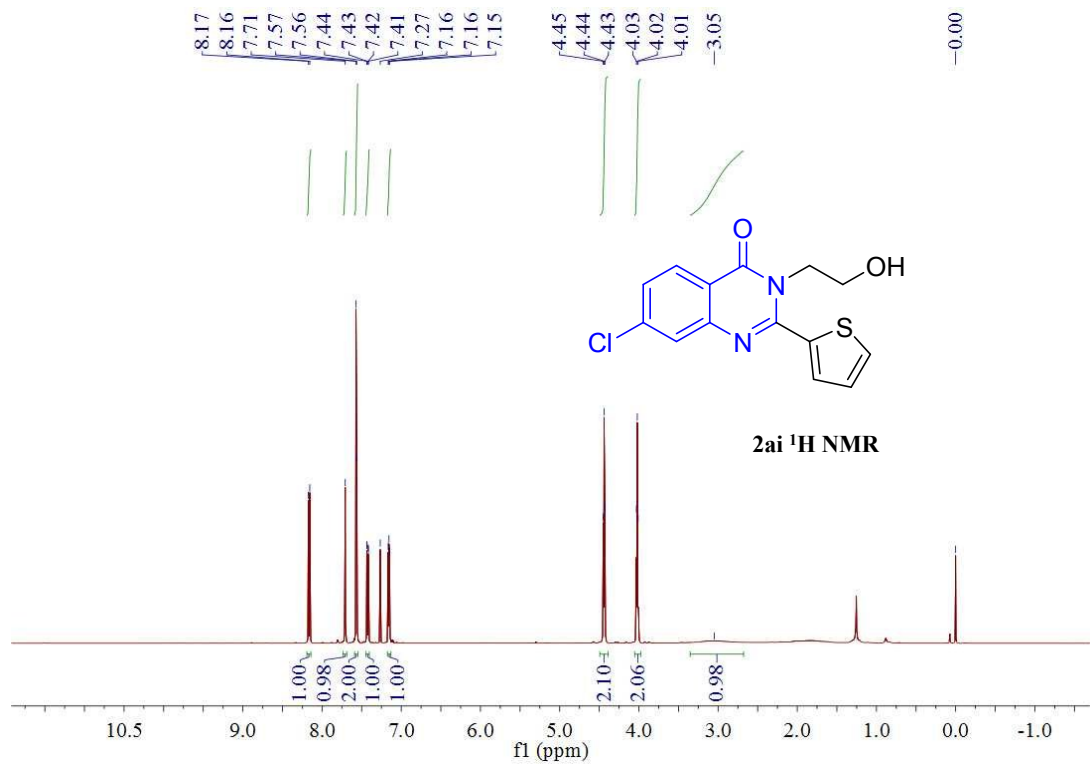

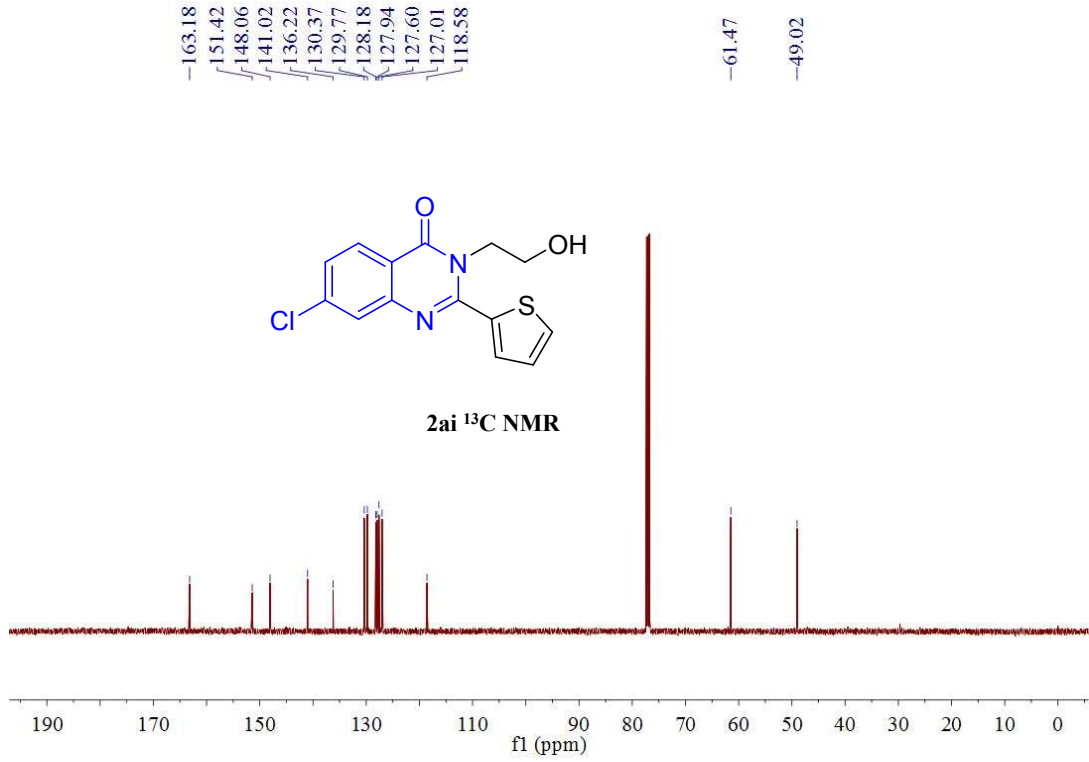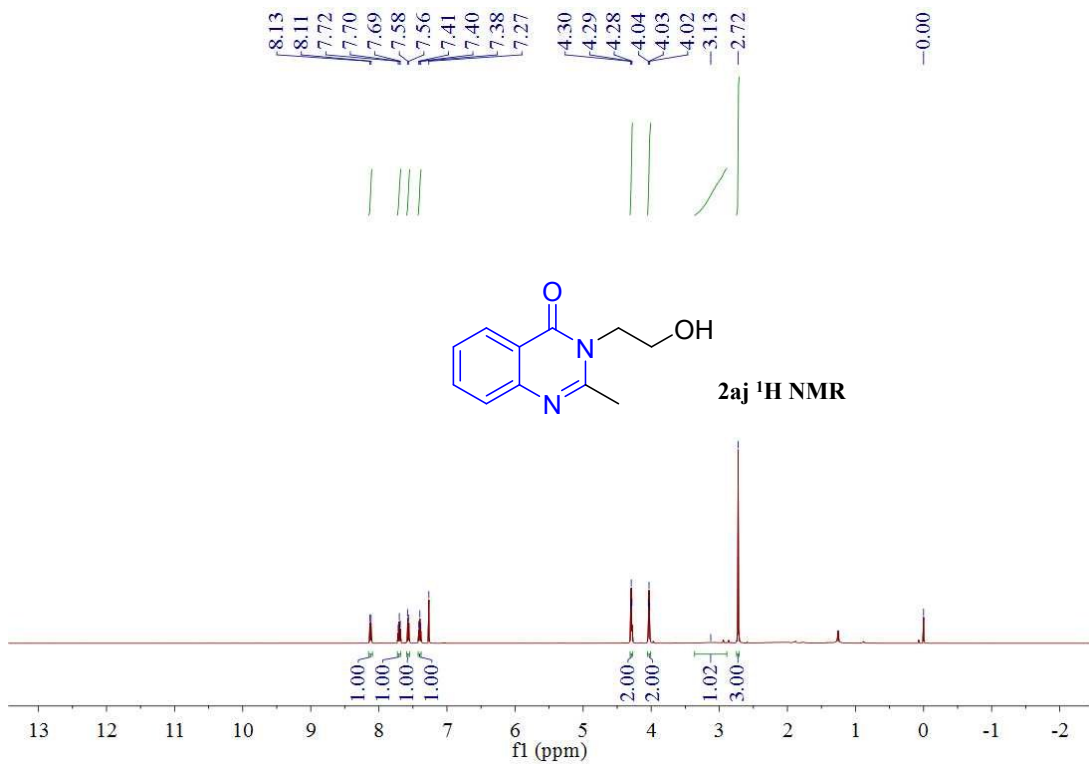

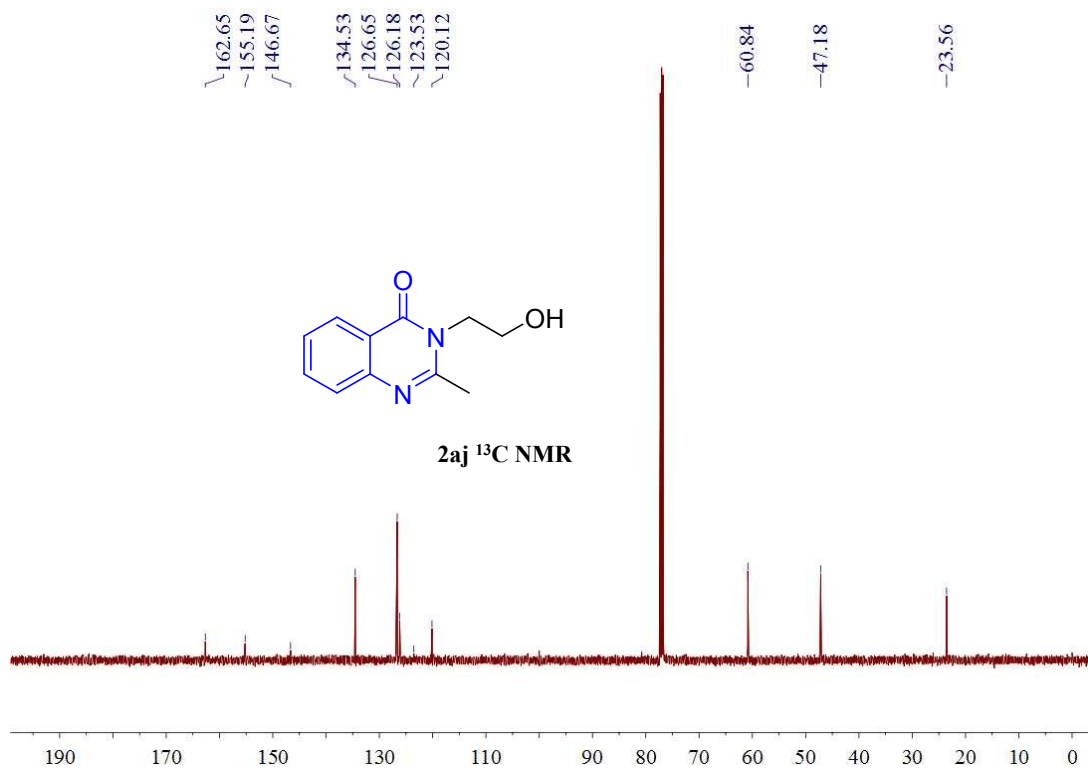

Supplement: d0ob00881h1.pdf [file d0ob00881h1.pdf]
